# Supplementary material for: Effect of Antibiotics on Gut and Vaginal Microbiomes Associated with Cervical Cancer Development in Mice
Source: Oxford University Press journal article supplement (doi:10.1158/1940-6207.capr-20-0103), 2020-09-11
Supplement: 19406207capr200103-sup-238593_2_supp_6478102_q4lylh.xlsx [file 19406207capr200103-sup-238593_2_supp_6478102_q4lylh.xlsx]

## Sheet: Table S1
Table S1. OTUs and their normalized abundances in the discovery cohort
Each sample ID includes the sampled environment, Gut (G) or Vagina (V) and the mouse ID (M1, M10 and so on)
Metadata of the samples are given in Supplementary table S3
Taxa/Samples	G_M1	G_M10	G_M11	G_M12	G_M13	G_M14	G_M15	G_M17	G_M18	G_M19	G_M2	G_M20	G_M21	G_M22	G_M23	G_M24	G_M25	G_M27	G_M28	G_M29	G_M3	G_M30	G_M31	G_M32	G_M33	G_M34	G_M35	G_M36	G_M37	G_M39	G_M4	G_M40	G_M41	G_M42	G_M43	G_M44	G_M45	G_M46	G_M48	G_M49	G_M5	G_M51	G_M6	G_M7	G_M8	G_M9	V_M1	V_M10	V_M11
Archaea	0	0	0	0	0	0	0	0	0	0	0	0	0	0	0	0	0	0	0	0	0	0	0	0	0	0	0	0	0	0	0	0	0	0	0	0	0	0	0	0	0	0	0	0	0	0	0	0	0
Archaea|Euryarchaeota|Halobacteria|Halobacteriales|Halobacteriaceae|Halorubellus	0	0	0	0	0	0	0	0	0	0	0	0	0	0	0	0	0	0	0	0	0	0	0	0	0	0	0	0	0	0	0	0	0	0	0	0	0	0	0	0	0	0	0	0	0	0	0	0	0
Archaea|Euryarchaeota|Halobacteria|Halobacteriales|Halobacteriaceae|Halorubrum	0	0	0	0	0	0	0	0	0	0	0	0	0	0	0	0	0	0	0	0	0	0	0	0	0	0	0	0	0	0	0	0	0	0	0	0	0	0	0	0	0	0	0	0	0	0	0	0	0
Bacteria	1	1	1	1	1	1	1	1	1	1	1	1	1	1	1	1	1	1	1	1	1	1	1	1	1	1	1	1	1	1	1	1	1	1	1	1	1	1	1	1	1	1	1	1	1	1	1	1	1
Bacteria|Acidobacteria	0	0	0	0	0	0	0	0	0	0	0	0	0	0	0	0	0	0	0	0	0	0	0	0	0	0	0	0	0	0	0	0	0	0	0	0	0	0	0	0	0	0	0	0	0	0	0	0	0
Bacteria|Acidobacteria|Blastocatellia|Blastocatellales	0	0	0	0	0	0	0	0	0	0	0	0	0	0	0	0	0	0	0	0	0	0	0	0	0	0	0	0	0	0	0	0	0	0	0	0	0	0	0	0	0	0	0	0	0	0	0	0	0
Bacteria|Acidobacteria|Solibacteres|Solibacterales	0	0	0	0	0	0	0	0	0	0	0	0	0	0	0	0	0	0	0	0.00535619	0	0	0	0	0	0	0	0	0	0	0	0	0	0	0	0	0	0	0	0	0	0	0	0	0	0	0	0	0
Bacteria|Actinobacteria|Acidimicrobiia|Acidimicrobiales	0	0	0	0	0	0	0	0	0	0	0	0	0	0	0	0	0	0	0	0.00696304	0	0	0	0	0	0	0	0	0	0	0	0	0	0	0	0	0	0	0	0	0	0	0	0	0	0	0	0	0
Bacteria|Actinobacteria|Acidimicrobiia|Acidimicrobiales|Acidimicrobiaceae	0	0	0	0	0	0	0	0	0	0	0	0	0	0	0	0	0	0	0	0	0	0	0	0	0	0	0	0	0	0	0	0	0	0	0	0	0	0	0	0	0	0	0	0	0	0	0	0	0
Bacteria|Actinobacteria|Acidimicrobiia|Acidimicrobiales|Acidimicrobiaceae|Ilumatobacter	0	0	0	0	0	0	0	0	0	0	0	0	0	0	0	0	0	0	0	0	0	0	0	0	0	0	0	0	0	0	0	0	0	0	0	0	0	0	0	0	0	0	0	0	0	0	0	0	0
Bacteria|Actinobacteria|Actinobacteria|Actinomycetales|Actinomycetaceae|Actinomyces	0	0	0	0	0	0	0	0	0	0	0	0	0	0	0	0	0	0	0	0	0	0	0	0	0	0	0	0	0	0	0	0	0	0	0	0	0	0	0	0	0	0	0	0	0	0	0	0	0
Bacteria|Actinobacteria|Actinobacteria|Bifidobacteriales|Bifidobacteriaceae|Bifidobacterium	0	0	0	0	0	0	0	0	0	0	0	0	0	0	0	0	0	0	0	0	0	0	0.00428495	0	0.00964114	0	0	0	0	0	0	0.000535619	0	0	0	0	0	0	0	0	0	0	0	0	0	0	0.00183038	0	0
Bacteria|Actinobacteria|Actinobacteria|Bifidobacteriales|Bifidobacteriaceae|Gardnerella	0	0	0	0	0	0	0	0	0	0	0	0	0	0	0	0	0	0	0	0	0	0	0	0	0	0	0	0	0	0	0	0	0	0	0	0	0	0	0	0	0	0	0	0	0	0	0	0	0
Bacteria|Actinobacteria|Actinobacteria|Corynebacteriales|Corynebacteriaceae	0	0	0	0	0	0	0	0	0	0	0	0	0.0192823	0.00910552	0.00535619	0.00803428	0.00107124	0	0.0192823	0.00374933	0	0.00160686	0.00428495	0.00964114	0.00107124	0.00214247	0.00803428	0	0	0.00482057	0	0	0	0	0	0	0	0	0	0	0	0	0	0	0	0	0.0140329	0	0
Bacteria|Actinobacteria|Actinobacteria|Corynebacteriales|Corynebacteriaceae|Corynebacterium	0	0	0	0	0	0	0	0	0	0	0	0	0	0	0	0	0	0	0	0	0	0	0	0	0	0	0	0	0	0	0	0	0	0	0	0	0	0	0	0	0	0	0	0	0	0	0	0	0
Bacteria|Actinobacteria|Actinobacteria|Corynebacteriales|Corynebacteriaceae|Lawsonella	0	0	0	0	0	0	0	0	0	0	0	0	0	0	0	0	0	0	0	0	0	0.00107124	0	0	0.0658811	0	0	0	0	0.0203535	0	0	0	0	0	0	0	0	0	0	0	0	0	0	0	0	0.00854179	0	0
Bacteria|Actinobacteria|Actinobacteria|Corynebacteriales|Mycobacteriaceae|Mycobacterium	0	0	0	0	0	0	0	0	0	0	0	0	0	0.00267809	0	0	0	0	0	0.00482057	0	0	0	0	0	0	0	0	0	0	0	0	0	0	0	0	0	0	0	0	0	0	0	0	0	0	0	0	0
Bacteria|Actinobacteria|Actinobacteria|Corynebacteriales|Nocardiaceae|Gordonia	0	0	0	0	0	0	0	0	0	0	0	0	0	0	0	0	0	0	0	0	0	0	0	0	0	0	0	0	0	0	0	0.000535619	0	0	0	0	0	0	0	0	0	0	0	0	0	0	0	0	0
Bacteria|Actinobacteria|Actinobacteria|Corynebacteriales|Nocardiaceae|Rhodococcus	0	0	0	0	0	0	0	0	0	0	0	0	0.00107124	0	0	0	0	0	0	0	0	0	0	0	0	0	0	0	0	0	0	0	0	0	0	0	0	0	0	0	0	0	0	0	0	0	0	0	0
Bacteria|Actinobacteria|Actinobacteria|Frankiales|Frankiaceae|Jatrophihabitans	0	0	0	0	0	0	0	0	0	0	0	0	0	0	0	0	0	0	0	0	0	0	0	0	0	0	0	0	0	0	0	0	0	0	0	0	0	0	0	0	0	0	0	0	0	0	0	0	0
Bacteria|Actinobacteria|Actinobacteria|Frankiales|Geodermatophilaceae	0	0	0	0	0	0	0	0	0	0	0	0	0	0	0	0	0	0	0	0	0	0	0	0	0	0	0	0	0	0	0	0	0	0	0	0	0	0	0	0	0	0	0	0	0	0	0	0	0
Bacteria|Actinobacteria|Actinobacteria|Frankiales|Geodermatophilaceae|Blastococcus	0	0	0	0	0	0	0	0	0	0	0	0	0	0	0	0	0	0	0	0	0	0	0	0	0	0	0	0	0	0	0	0	0	0	0	0	0	0	0	0	0	0	0	0	0	0	0	0	0
Bacteria|Actinobacteria|Actinobacteria|Frankiales|Geodermatophilaceae|Geodermatophilus	0	0	0	0	0	0	0	0	0	0	0	0	0	0.00374933	0	0	0	0	0	0	0	0	0	0	0	0	0	0	0	0	0	0	0	0	0	0	0	0	0	0	0	0	0	0	0	0	0	0	0
Bacteria|Actinobacteria|Actinobacteria|Kineosporiales|Kineosporiaceae|Kineococcus	0	0	0	0	0	0	0	0	0	0	0	0	0	0	0	0	0.00482057	0	0	0	0	0	0	0	0	0	0	0	0	0	0	0	0	0	0	0	0	0	0	0	0	0	0	0	0	0	0	0	0
Bacteria|Actinobacteria|Actinobacteria|Kineosporiales|Kineosporiaceae|Quadrisphaera	0	0	0	0	0	0	0	0	0	0	0	0	0	0	0	0	0	0	0.00107124	0	0	0	0	0	0	0	0.00214247	0	0	0	0	0	0	0	0	0	0	0	0	0	0	0	0	0	0	0	0	0	0
Bacteria|Actinobacteria|Actinobacteria|Micrococcales|Bogoriellaceae|Georgenia	0	0	0	0	0	0	0	0	0	0	0	0	0	0	0	0	0	0	0	0	0	0	0	0	0	0	0	0	0	0	0	0	0	0	0	0	0	0	0	0	0	0	0	0	0	0	0	0	0
Bacteria|Actinobacteria|Actinobacteria|Micrococcales|Brevibacteriaceae|Brevibacterium	0	0	0	0	0	0	0	0	0	0	0	0	0	0	0	0.00107124	0	0	0	0	0	0	0	0	0	0	0	0	0	0	0	0	0	0	0	0	0	0	0	0	0	0	0	0	0	0	0	0	0
Bacteria|Actinobacteria|Actinobacteria|Micrococcales|Cellulomonadaceae|Actinotalea	0	0	0	0	0	0	0	0	0	0	0	0	0	0	0	0	0	0	0	0	0	0	0	0	0	0	0	0	0	0	0	0	0	0	0	0	0	0	0	0	0	0	0	0	0	0	0	0	0
Bacteria|Actinobacteria|Actinobacteria|Micrococcales|Dermabacteraceae|Brachybacterium	0	0	0	0	0	0	0	0	0	0	0	0	0	0	0	0	0	0	0	0	0	0	0	0	0.00321371	0	0	0	0	0	0	0	0	0	0	0	0	0	0	0	0	0	0	0	0	0	0	0	0
Bacteria|Actinobacteria|Actinobacteria|Micrococcales|Intrasporangiaceae|Janibacter	0	0	0	0	0	0	0	0	0	0	0	0	0	0	0	0	0	0	0	0	0	0	0	0	0	0	0	0	0	0	0	0	0	0	0	0	0	0	0	0	0	0	0	0	0	0	0	0	0
Bacteria|Actinobacteria|Actinobacteria|Micrococcales|Intrasporangiaceae|Ornithinimicrobium	0	0	0	0	0	0	0	0	0	0	0	0	0	0	0	0	0	0	0	0	0	0	0	0	0	0	0	0	0	0	0	0	0	0	0	0	0	0	0	0	0	0	0	0	0	0	0	0	0
Bacteria|Actinobacteria|Actinobacteria|Micrococcales|Intrasporangiaceae|Phycicoccus	0	0	0	0	0	0	0	0	0	0	0	0	0	0	0	0	0	0	0	0.0101768	0	0	0	0	0	0	0	0	0	0	0	0	0	0	0	0	0	0	0	0	0	0	0	0	0	0	0	0	0
Bacteria|Actinobacteria|Actinobacteria|Micrococcales|Microbacteriaceae|Curtobacterium	0	0	0	0	0	0	0	0	0	0	0	0	0.00589181	0.00321371	0	0	0.00214247	0	0.0235672	0.0144617	0	0.00267809	0.00482057	0.0139261	0	0.00482057	0.00803428	0	0	0.00482057	0	0	0	0	0	0	0	0	0	0	0	0	0	0	0	0	0	0	0
Bacteria|Actinobacteria|Actinobacteria|Micrococcales|Microbacteriaceae|Frondihabitans	0	0	0	0	0	0	0	0	0	0	0	0	0	0	0	0	0	0	0	0	0	0	0	0	0	0	0	0	0	0	0	0	0	0	0	0	0	0	0	0	0	0	0	0	0	0	0	0	0
Bacteria|Actinobacteria|Actinobacteria|Micrococcales|Micrococcaceae|Glutamicibacter	0	0	0	0	0	0	0	0	0	0	0	0	0	0	0	0	0	0	0	0	0	0	0	0	0	0	0	0	0	0	0	0	0	0	0	0	0	0	0	0	0	0	0	0	0	0	0	0	0
Bacteria|Actinobacteria|Actinobacteria|Micrococcales|Micrococcaceae|Kocuria	0	0	0	0	0	0	0	0	0	0	0	0	0	0	0	0	0	0	0	0	0	0	0	0	0	0	0	0	0	0.0171398	0	0	0	0	0	0	0	0	0	0	0	0	0	0	0	0	0	0	0
Bacteria|Actinobacteria|Actinobacteria|Micrococcales|Micrococcaceae|Micrococcus	0	0	0	0	0	0	0	0	0	0	0	0	0	0	0	0	0	0	0	0	0	0	0	0	0	0	0	0	0	0	0	0	0	0	0	0	0	0	0	0	0	0	0	0	0	0	0	0	0
Bacteria|Actinobacteria|Actinobacteria|Micrococcales|Micrococcaceae|Nesterenkonia	0	0	0	0	0	0	0	0	0	0	0	0	0	0	0	0	0	0	0	0	0	0	0	0	0	0	0	0	0	0	0	0	0	0	0	0	0	0	0	0	0	0	0	0	0	0	0	0	0
Bacteria|Actinobacteria|Actinobacteria|Micrococcales|Micrococcaceae|Pseudarthrobacter	0	0	0	0	0	0	0	0	0	0	0	0	0.00267809	0	0.00214247	0	0	0	0	0.0621318	0	0.00267809	0	0	0	0.00482057	0	0	0	0	0	0	0	0	0	0	0	0	0	0	0	0	0	0	0	0	0	0	0
Bacteria|Actinobacteria|Actinobacteria|Micrococcales|Micrococcaceae|Rothia	0	0	0	0	0	0	0	0	0	0	0	0	0	0	0	0	0	0	0.00964114	0	0	0	0	0	0	0	0	0	0	0.00428495	0	0	0	0	0	0	0	0	0	0	0	0	0	0	0	0	0	0.00244051	0
Bacteria|Actinobacteria|Actinobacteria|Micrococcales|Sanguibacteraceae|Sanguibacter	0	0	0	0	0	0	0	0	0	0	0	0	0	0	0.00482057	0	0	0	0	0	0	0	0	0	0	0	0	0	0	0.0107124	0	0	0	0	0	0	0	0	0	0	0	0	0	0	0	0	0	0	0
Bacteria|Actinobacteria|Actinobacteria|Micromonosporales|Micromonosporaceae|Actinoplanes	0	0	0	0	0	0	0	0	0	0	0	0	0	0	0	0	0	0	0	0	0	0	0	0	0	0	0	0	0	0	0	0	0	0	0	0	0	0	0	0	0	0	0	0	0	0	0	0	0
Bacteria|Actinobacteria|Actinobacteria|Propionibacteriales|Nocardioidaceae|Aeromicrobium	0	0	0	0	0	0	0	0	0	0	0	0	0	0	0	0	0	0	0	0	0	0	0	0	0	0	0	0	0	0	0	0	0	0	0	0	0	0	0	0	0	0	0	0	0	0	0	0	0
Bacteria|Actinobacteria|Actinobacteria|Propionibacteriales|Nocardioidaceae|Nocardioides	0	0	0	0	0	0	0	0	0	0	0	0	0	0	0	0	0	0.00160686	0	0.0733798	0	0	0	0	0	0	0	0	0	0	0	0	0	0	0	0	0	0	0	0	0	0	0	0	0	0	0	0	0
Bacteria|Actinobacteria|Actinobacteria|Propionibacteriales|Propionibacteriaceae|Propionibacterium	0	0	0	0	0	0	0	0	0	0	0	0	0	0	0	0	0	0	0	0	0	0	0	0.000535619	0.000535619	0	0	0	0	0.00214247	0	0	0	0	0	0	0	0	0	0	0	0	0	0	0	0	0	0	0
Bacteria|Actinobacteria|Actinobacteria|Pseudonocardiales|Pseudonocardiaceae|Pseudonocardia	0	0	0	0	0	0	0	0	0	0	0	0	0	0	0	0	0	0	0.00107124	0	0	0	0	0	0	0	0	0	0	0.00535619	0	0	0	0	0	0	0	0	0	0	0	0	0	0	0	0	0	0	0
Bacteria|Actinobacteria|Actinobacteria|Pseudonocardiales|Pseudonocardiaceae|Saccharopolyspora	0	0	0	0	0	0	0	0	0	0	0	0	0	0	0	0	0	0	0	0	0	0	0	0	0	0	0	0	0	0	0	0	0	0	0	0	0	0	0	0	0	0	0	0	0	0	0	0	0
Bacteria|Actinobacteria|Actinobacteria|Streptomycetales|Streptomycetaceae|Streptomyces	0	0	0	0	0	0	0	0	0	0	0	0	0	0	0	0	0	0	0	0	0	0	0	0	0	0	0	0	0	0	0	0	0	0	0	0	0	0	0	0	0	0	0	0	0	0	0	0	0
Bacteria|Actinobacteria|Coriobacteriia|Coriobacteriales|Coriobacteriaceae	0.011248	0.00535619	0.00535619	0.00321371	0.00214247	0.00107124	0.00321371	0.00482057	0.00160686	0.00428495	0.00428495	0.00267809	0.0117836	0.00214247	0	0.00107124	0	0.00267809	0	0	0.00214247	0.00428495	0	0	0.00696304	0	0	0	0	0	0.00428495	0.000535619	0.000535619	0.00160686	0	0.00160686	0.00160686	0.00107124	0.00160686	0.00160686	0.00214247	0.00160686	0.00267809	0.00535619	0.00107124	0.00267809	0.0115924	0.0134228	0.0158633
Bacteria|Actinobacteria|Coriobacteriia|Coriobacteriales|Coriobacteriaceae|Atopobium	0	0	0	0	0	0	0	0	0	0	0	0	0	0	0	0	0	0	0	0	0	0	0	0	0	0	0	0	0	0	0	0.00107124	0	0	0	0	0	0	0	0	0	0	0	0	0	0	0	0	0
Bacteria|Actinobacteria|Coriobacteriia|Coriobacteriales|Coriobacteriaceae|Collinsella	0	0	0	0	0	0	0	0	0	0	0	0	0	0	0	0	0	0	0	0	0	0	0	0.0123192	0	0	0	0	0	0	0	0	0	0	0	0	0	0	0	0	0	0	0	0	0	0	0	0.000610128	0
Bacteria|Actinobacteria|Coriobacteriia|Coriobacteriales|Coriobacteriaceae|Enterorhabdus	0	0.000535619	0	0	0	0	0	0.000535619	0.000535619	0	0	0	0	0	0	0	0	0.000535619	0	0	0	0	0	0	0	0	0	0	0	0	0	0	0	0	0	0	0	0	0.000535619	0	0.000535619	0	0	0	0	0	0	0	0
Bacteria|Actinobacteria|Coriobacteriia|Coriobacteriales|Coriobacteriaceae|Parvibacter	0	0	0	0	0	0	0	0	0	0	0	0	0	0	0	0	0	0	0	0.00214247	0	0	0	0	0	0	0	0	0	0	0	0	0	0	0	0	0	0	0	0	0	0	0	0	0	0	0.00122026	0	0
Bacteria|Actinobacteria|Coriobacteriia|Coriobacteriales|Coriobacteriaceae|Senegalimassilia	0	0	0	0	0	0	0	0	0	0	0	0	0	0	0	0	0	0	0	0	0	0	0	0	0	0	0	0	0	0	0	0	0	0	0	0	0	0	0	0	0	0	0	0	0	0	0	0	0
Bacteria|Actinobacteria|Coriobacteriia|Coriobacteriales|Coriobacteriaceae|Slackia	0	0	0	0	0	0	0	0	0	0	0	0	0	0	0	0	0	0	0	0	0	0	0	0	0	0	0	0	0	0	0	0	0	0	0	0	0	0	0	0	0	0	0	0	0	0	0	0	0
Bacteria|Actinobacteria|Rubrobacteria|Rubrobacterales|Rubrobacteriaceae|Rubrobacter	0	0	0	0	0	0	0	0	0	0	0	0	0	0	0	0	0	0	0	0	0	0	0	0	0	0	0	0	0	0	0	0	0	0	0	0	0	0	0	0	0	0	0	0	0	0	0	0	0
Bacteria|Actinobacteria|Thermoleophilia|Gaiellales	0	0	0	0	0	0	0	0	0	0	0	0	0	0	0	0	0	0.00267809	0	0.00803428	0	0	0	0	0	0	0	0	0	0	0	0	0	0	0	0	0	0	0	0	0	0	0	0	0	0	0	0	0
Bacteria|Actinobacteria|Thermoleophilia|Solirubrobacterales	0	0	0	0	0	0	0	0	0	0	0	0	0	0	0	0	0	0	0	0	0	0	0	0	0	0	0	0	0	0	0	0	0	0	0	0	0	0	0	0	0	0	0	0	0	0	0	0	0
Bacteria|Actinobacteria|Thermoleophilia|Solirubrobacterales|Conexibacteraceae|Conexibacter	0	0	0	0	0	0	0	0	0	0	0	0	0	0	0	0.00589181	0	0	0	0	0	0	0	0	0	0	0	0	0	0	0	0	0	0	0	0	0	0	0	0	0	0	0	0	0	0	0	0	0
Bacteria|Actinobacteria|Thermoleophilia|Solirubrobacterales|Patulibacteraceae|Patulibacter	0	0	0	0	0	0	0	0	0	0	0	0	0	0	0	0	0	0	0	0	0	0	0	0	0	0	0	0	0	0	0	0	0	0	0	0	0	0	0	0	0	0	0	0	0	0	0	0	0
Bacteria|Actinobacteria|Thermoleophilia|Solirubrobacterales|Solirubrobacteraceae|Solirubrobacter	0	0	0	0	0	0	0	0	0	0	0	0	0	0	0	0	0	0	0	0.0176754	0	0	0	0	0	0	0	0	0	0	0	0	0	0	0	0	0	0	0	0	0	0	0	0	0	0	0	0	0
Bacteria|Armatimonadetes|Fimbriimonadia|Fimbriimonadales|Fimbriimonadaceae	0	0	0	0	0	0	0	0	0	0	0	0	0	0	0	0	0	0	0	0	0	0	0	0	0	0	0	0	0	0	0	0	0	0	0	0	0	0	0	0	0	0	0	0	0	0	0	0	0
Bacteria|Bacteroidetes	0	0	0	0	0	0	0	0	0	0	0	0	0	0	0	0	0	0	0	0	0	0	0	0	0	0	0	0	0	0	0	0	0	0	0	0	0	0	0	0	0	0	0	0	0	0	0	0	0
Bacteria|Bacteroidetes|Bacteroidia|Bacteroidales	0.656668	0.632566	0.577397	0.501339	0.763257	0.574719	0.553294	0.517943	0.435994	0.652919	0.6015	0.555972	0.299411	0.286556	0.096947	0.136047	0.394215	0.521157	0.155865	0.0123192	0.574719	0.591859	0.0674879	0.0819497	0.0342796	0.00107124	0.155865	0.0444563	0.0417783	0.0380289	0.520621	0.363149	0.358864	0.713444	0.840921	0.694162	0.752544	0.544724	0.729513	0.628281	0.540439	0.817354	0.609534	0.655062	0.623996	0.566149	0.0305064	0.00183038	0.148871
Bacteria|Bacteroidetes|Bacteroidia|Bacteroidales|Bacteroidaceae|Bacteroides	0	0	0	0	0	0	0	0	0	0	0	0	0.00160686	0.00428495	0.00910552	0.00374933	0.00267809	0.00428495	0.0637386	0	0	0	0	0.051955	0.0133905	0.00589181	0.0101768	0.0471344	0.0428495	0.0417783	0	0.0176754	0	0	0	0	0.00160686	0	0	0	0	0	0	0	0	0	0	0.00366077	0
Bacteria|Bacteroidetes|Bacteroidia|Bacteroidales|Porphyromonadaceae|Barnesiella	0	0	0	0	0	0	0	0	0	0	0	0	0	0	0	0	0	0	0	0	0	0	0	0	0	0.00428495	0	0	0	0	0	0	0	0	0	0	0	0	0	0	0	0	0	0	0	0	0	0	0
Bacteria|Bacteroidetes|Bacteroidia|Bacteroidales|Porphyromonadaceae|Paludibacter	0	0	0	0	0	0	0	0	0	0	0	0	0	0	0	0	0	0	0	0	0	0	0	0	0	0	0	0	0	0	0	0	0	0	0	0	0	0	0	0	0	0	0	0	0	0	0	0	0
Bacteria|Bacteroidetes|Bacteroidia|Bacteroidales|Porphyromonadaceae|Parabacteroides	0	0	0	0	0	0	0	0	0	0	0	0	0	0	0	0	0	0	0	0	0	0	0	0	0	0	0	0	0	0	0	0	0	0	0	0	0	0	0	0	0	0	0	0	0	0	0	0	0
Bacteria|Bacteroidetes|Bacteroidia|Bacteroidales|Porphyromonadaceae|Proteiniphilum	0	0	0	0	0	0	0	0	0	0	0	0	0	0	0	0	0	0	0	0	0	0	0	0	0	0	0	0	0	0	0	0	0	0	0	0	0	0	0	0	0	0	0	0	0	0	0	0	0
Bacteria|Bacteroidetes|Bacteroidia|Bacteroidales|Prevotellaceae	0	0	0	0	0	0	0	0	0	0	0	0	0	0	0	0.0133905	0.029459	0.00964114	0.00482057	0	0	0	0	0.0101768	0.0107124	0	0.00964114	0.0851634	0.0728441	0.0219604	0	0.00589181	0.000535619	0	0	0	0	0	0	0	0	0	0	0	0	0	0	0	0.00122026
Bacteria|Bacteroidetes|Bacteroidia|Bacteroidales|Prevotellaceae|Alloprevotella	0	0	0	0	0	0	0	0	0	0	0	0	0.00589181	0.011248	0	0	0	0	0.0123192	0	0	0.00160686	0	0.0128548	0.0262453	0.0117836	0	0	0.0123192	0.00321371	0	0.0085699	0	0	0	0	0	0	0	0	0	0	0	0	0	0	0	0	0
Bacteria|Bacteroidetes|Bacteroidia|Bacteroidales|Prevotellaceae|Paraprevotella	0	0	0	0	0	0	0	0	0	0	0	0	0	0	0	0	0	0	0	0	0	0	0	0	0	0	0	0	0	0	0	0	0	0	0	0	0	0	0	0	0	0	0	0	0	0	0	0	0
Bacteria|Bacteroidetes|Bacteroidia|Bacteroidales|Prevotellaceae|Prevotella	0	0	0	0	0	0	0	0	0	0	0	0	0	0	0	0	0	0	0	0	0	0	0	0	0	0	0	0	0	0.0187467	0	0	0.000535619	0	0	0	0	0	0	0	0	0	0	0	0	0	0	0	0
Bacteria|Bacteroidetes|Bacteroidia|Bacteroidales|Rikenellaceae	0	0	0	0	0	0	0	0	0	0	0	0	0	0	0	0	0	0	0	0	0	0	0	0	0	0	0	0	0	0	0	0	0	0	0	0	0	0	0	0	0	0	0	0	0	0	0	0	0
Bacteria|Bacteroidetes|Bacteroidia|Bacteroidales|Rikenellaceae|Alistipes	0	0	0	0	0	0	0	0	0	0	0	0	0	0	0.0176754	0.0187467	0.0412426	0.0273166	0	0	0	0	0	0	0	0	0.011248	0	0	0	0	0.0107124	0	0	0	0	0.0251741	0.0840921	0.0626674	0	0	0	0	0	0	0	0	0	0
Bacteria|Bacteroidetes|Cytophagia|Cytophagales|Cytophagaceae	0	0	0	0	0	0	0	0	0	0	0	0	0	0	0	0	0	0	0	0	0	0	0	0	0	0	0	0	0	0	0	0	0	0	0	0	0	0	0	0	0	0	0	0	0	0	0	0	0
Bacteria|Bacteroidetes|Cytophagia|Cytophagales|Cytophagaceae|Cytophaga	0	0	0	0	0	0	0	0	0	0	0	0	0	0	0	0	0	0	0	0	0	0	0	0	0	0	0	0	0	0	0	0	0	0	0	0	0	0	0	0	0	0	0	0	0	0	0	0	0
Bacteria|Bacteroidetes|Cytophagia|Cytophagales|Cytophagaceae|Emticicia	0	0	0	0	0	0	0	0	0	0	0	0	0	0	0	0	0	0	0	0.00482057	0	0	0	0	0	0	0	0	0	0	0	0	0	0	0	0	0	0	0	0	0	0	0	0	0	0	0	0	0
Bacteria|Bacteroidetes|Cytophagia|Cytophagales|Cytophagaceae|Hymenobacter	0	0	0	0	0	0	0	0	0	0	0	0	0	0	0	0	0	0	0	0.00321371	0	0	0	0	0	0	0	0	0	0	0	0	0	0	0	0	0	0	0	0	0	0	0	0	0	0	0	0	0
Bacteria|Bacteroidetes|Cytophagia|Cytophagales|Cytophagaceae|Persicitalea	0	0	0	0	0	0	0	0	0	0	0	0	0	0	0	0	0	0	0	0	0	0	0	0	0	0	0	0	0	0	0	0	0	0	0	0	0	0	0	0	0	0	0	0	0	0	0	0	0
Bacteria|Bacteroidetes|Flavobacteriia|Flavobacteriales	0	0	0	0	0	0	0	0	0	0	0	0	0	0	0	0	0	0	0	0	0	0	0	0	0	0	0	0	0	0	0	0	0	0	0	0	0	0	0	0	0	0	0	0	0	0	0	0	0
Bacteria|Bacteroidetes|Flavobacteriia|Flavobacteriales|Cryomorphaceae|Fluviicola	0	0	0	0	0	0	0	0	0	0	0	0	0	0	0	0	0	0	0	0	0	0	0	0	0	0	0	0	0	0	0	0	0	0	0	0	0	0	0	0	0	0	0	0	0	0	0	0	0
Bacteria|Bacteroidetes|Flavobacteriia|Flavobacteriales|Flavobacteriaceae	0	0	0	0	0	0	0	0	0	0	0	0	0	0	0	0	0	0	0	0	0	0	0	0	0	0	0	0	0	0	0	0	0	0	0	0	0	0	0	0	0	0	0	0	0	0	0	0	0
Bacteria|Bacteroidetes|Flavobacteriia|Flavobacteriales|Flavobacteriaceae|Bergeyella	0	0	0	0	0	0	0	0	0	0	0	0	0	0	0	0	0	0	0	0	0	0	0	0	0	0	0	0	0	0	0	0	0	0	0	0	0	0	0	0	0	0	0	0	0	0	0	0	0
Bacteria|Bacteroidetes|Flavobacteriia|Flavobacteriales|Flavobacteriaceae|Capnocytophaga	0	0	0	0	0	0	0	0	0	0	0	0	0	0	0	0	0	0	0	0	0	0	0	0	0	0	0	0	0	0	0	0	0	0	0	0	0	0	0	0	0	0	0	0	0	0	0	0	0
Bacteria|Bacteroidetes|Flavobacteriia|Flavobacteriales|Flavobacteriaceae|Chryseobacterium	0	0	0	0	0	0	0	0	0	0	0	0	0	0	0	0	0	0	0	0	0	0	0	0	0	0	0	0	0	0	0	0	0	0	0	0	0	0	0	0	0	0	0	0	0	0	0	0	0
Bacteria|Bacteroidetes|Flavobacteriia|Flavobacteriales|Flavobacteriaceae|Cloacibacterium	0	0	0	0	0	0	0	0	0	0	0	0	0	0	0.00910552	0	0	0	0	0	0	0	0	0	0	0	0	0	0	0	0	0	0	0	0	0	0	0	0	0	0	0	0	0	0	0	0	0	0
Bacteria|Bacteroidetes|Flavobacteriia|Flavobacteriales|Flavobacteriaceae|Epilithonimonas	0	0	0	0	0	0	0	0	0	0	0	0	0	0	0	0	0	0	0	0	0	0	0	0	0	0	0	0	0	0	0	0	0	0	0	0	0	0	0	0	0	0	0	0	0	0	0	0	0
Bacteria|Bacteroidetes|Flavobacteriia|Flavobacteriales|Flavobacteriaceae|Flavobacterium	0	0	0	0	0	0	0	0	0	0	0	0	0	0	0	0	0	0	0	0.00160686	0	0	0	0	0	0	0	0	0	0	0	0	0	0	0	0	0	0	0	0	0	0	0	0	0	0	0	0	0
Bacteria|Bacteroidetes|Flavobacteriia|Flavobacteriales|Flavobacteriaceae|Moheibacter	0	0	0	0	0	0	0	0	0	0	0	0	0	0	0	0	0	0	0	0	0	0	0	0	0	0	0	0	0	0	0	0	0	0	0	0	0	0	0	0	0	0	0	0	0	0	0.00122026	0	0
Bacteria|Bacteroidetes|Sphingobacteriia|Sphingobacteriales	0	0	0	0	0	0	0	0	0	0	0	0	0	0	0	0	0	0	0	0	0	0	0	0	0	0	0	0	0	0	0	0	0	0	0	0	0	0	0	0	0	0	0	0	0	0	0	0.00793167	0
Bacteria|Bacteroidetes|Sphingobacteriia|Sphingobacteriales|Chitinophagaceae	0	0	0	0	0	0	0	0	0	0	0	0	0	0	0	0	0	0	0	0	0	0	0	0	0	0	0	0	0	0	0	0	0	0	0	0	0	0	0	0	0	0	0	0	0	0	0	0	0
Bacteria|Bacteroidetes|Sphingobacteriia|Sphingobacteriales|Chitinophagaceae|Cnuella	0	0	0	0	0	0	0	0	0	0	0	0	0	0	0	0	0	0	0	0	0	0	0	0	0.0332084	0	0	0	0	0	0	0	0	0	0	0	0	0	0	0	0	0	0	0	0	0	0	0	0
Bacteria|Bacteroidetes|Sphingobacteriia|Sphingobacteriales|Chitinophagaceae|Filimonas	0	0	0	0	0	0	0	0	0	0	0	0	0	0	0	0	0	0	0	0	0	0	0	0	0	0	0	0	0	0	0	0	0	0	0	0	0	0	0	0	0	0	0	0	0	0	0	0	0
Bacteria|Bacteroidetes|Sphingobacteriia|Sphingobacteriales|Chitinophagaceae|Terrimonas	0	0	0	0	0	0	0	0	0	0	0	0	0	0	0	0	0	0	0	0.0101768	0	0	0	0	0	0	0	0	0	0	0	0	0	0	0	0	0	0	0	0	0	0	0	0	0	0	0	0	0
Bacteria|Bacteroidetes|Sphingobacteriia|Sphingobacteriales|Lentimicrobiaceae	0	0	0	0	0	0	0	0	0	0	0	0	0	0	0	0	0	0	0	0	0	0	0	0	0	0	0	0	0	0	0	0	0	0	0	0	0	0	0	0	0	0	0	0	0	0	0	0	0
Bacteria|Bacteroidetes|Sphingobacteriia|Sphingobacteriales|Saprospiraceae	0	0	0	0	0	0	0	0	0	0	0	0	0	0	0	0	0	0	0	0	0	0	0	0	0	0	0	0	0	0	0	0	0	0	0	0	0	0	0	0	0	0	0	0	0	0	0	0	0
Bacteria|Bacteroidetes|Sphingobacteriia|Sphingobacteriales|Saprospiraceae|Haliscomenobacter	0	0	0	0	0	0	0	0	0	0	0	0	0	0	0	0	0	0	0	0	0	0	0	0	0	0	0	0	0	0	0	0	0	0	0	0	0	0	0	0	0	0	0	0	0	0	0	0	0
Bacteria|Bacteroidetes|Sphingobacteriia|Sphingobacteriales|Saprospiraceae|Lewinella	0	0	0	0	0	0	0	0	0	0	0	0	0	0	0	0	0	0	0	0	0	0	0	0	0	0	0	0	0	0	0	0	0	0	0	0	0	0	0	0	0	0	0	0	0	0	0	0	0
Bacteria|Bacteroidetes|Sphingobacteriia|Sphingobacteriales|Sphingobacteriaceae|Mucilaginibacter	0	0	0	0	0	0	0	0	0	0	0	0	0	0	0	0	0	0	0	0	0	0	0	0	0	0	0	0	0	0	0	0	0	0	0	0	0	0	0	0	0	0	0	0	0	0	0	0	0
Bacteria|Bacteroidetes|Sphingobacteriia|Sphingobacteriales|Sphingobacteriaceae|Pedobacter	0	0	0	0	0	0	0	0	0	0	0	0	0	0	0	0	0	0	0	0	0	0.000535619	0	0	0	0	0	0	0	0	0	0	0	0	0	0	0	0	0	0	0	0	0	0	0	0	0.000610128	0	0
Bacteria|Bacteroidetes|Sphingobacteriia|Sphingobacteriales|Sphingobacteriaceae|Sphingobacterium	0	0	0	0	0	0	0	0	0	0	0	0	0	0	0.0241028	0	0	0	0	0	0	0	0	0	0	0	0	0	0	0	0	0	0	0	0	0	0	0	0	0	0	0	0	0	0	0	0	0	0
Bacteria|Chlorobi|Chlorobia|Chlorobiales	0	0	0	0	0	0	0	0	0	0	0	0	0	0	0	0	0	0	0	0	0	0	0	0	0	0	0	0	0	0	0	0	0	0	0	0	0	0	0	0	0	0	0	0	0	0	0	0	0
Bacteria|Chloroflexi	0	0	0	0	0	0	0	0	0	0	0	0	0	0	0	0	0	0.00107124	0	0	0	0	0	0	0	0	0	0	0	0	0	0	0	0	0	0	0	0	0	0	0	0	0	0	0	0	0	0	0
Bacteria|Chloroflexi|Anaerolineae|Anaerolineales|Anaerolineaceae	0	0	0	0	0	0	0	0	0	0	0	0	0	0	0	0	0	0	0	0	0	0	0	0	0	0	0	0	0	0	0	0	0	0	0	0	0	0	0	0	0	0	0	0	0	0	0	0	0
Bacteria|Chloroflexi|Anaerolineae|Anaerolineales|Anaerolineaceae|Bellilinea	0	0	0	0	0	0	0	0	0	0	0	0	0	0	0	0	0	0	0	0	0	0	0	0	0	0	0	0	0	0	0	0	0	0	0	0	0	0	0	0	0	0	0	0	0	0	0	0	0
Bacteria|Chloroflexi|Ardenticatenia	0	0	0	0	0	0	0	0	0	0	0	0	0	0	0	0	0	0	0	0	0	0	0	0	0	0	0	0	0	0	0	0	0	0	0	0	0	0	0	0	0	0	0	0	0	0	0	0	0
Bacteria|Chloroflexi|Ardenticatenia|Ardenticatenales	0	0	0	0	0	0	0	0	0	0	0	0	0	0	0	0	0	0	0	0	0	0	0	0	0	0	0	0	0	0	0	0	0	0	0	0	0	0	0	0	0	0	0	0	0	0	0	0	0
Bacteria|Chloroflexi|Caldilineae|Caldilineales|Caldilineaceae	0	0	0	0	0	0	0	0	0	0	0	0	0	0	0	0.00107124	0	0	0	0	0	0	0	0	0	0	0	0	0	0	0	0	0	0	0	0	0	0	0	0	0	0	0	0	0	0	0	0	0
Bacteria|Chloroflexi|Thermomicrobia	0	0	0	0	0	0	0	0	0	0	0	0	0	0	0	0	0	0	0	0	0	0	0	0	0	0	0	0	0	0	0	0	0	0	0	0	0	0	0	0	0	0	0	0	0	0	0	0	0
Bacteria|Cyanobacteria	0	0	0	0	0	0	0	0	0	0	0	0	0	0	0	0	0	0	0	0	0	0	0	0	0	0	0	0	0	0	0	0	0	0	0	0	0	0	0	0	0	0	0	0	0	0	0	0	0
Bacteria|Cyanobacteria|Chloroplast	0	0	0	0	0	0	0	0	0.00107124	0	0	0	0.244778	0.286556	0.313873	0.193358	0.16015	0.119443	0.253348	0.230316	0	0.0658811	0.413498	0.26406	0.116765	0.615426	0.508302	0.344938	0.411891	0.322978	0	0.18586	0	0	0	0	0	0	0	0.000535619	0	0	0	0	0	0	0.0994509	0.216595	0.0353874
Bacteria|Cyanobacteria|Cyanobacteria	0	0	0	0	0	0	0	0	0	0	0	0	0	0	0	0	0	0	0	0	0	0	0	0	0	0	0	0	0	0	0	0	0	0	0	0	0	0	0	0	0	0	0	0	0	0	0.00305064	0	0
Bacteria|Cyanobacteria|Melainabacteria|Gastranaerophilales	0	0	0	0	0	0	0	0	0	0	0	0	0	0	0	0	0	0	0	0	0	0	0	0	0	0	0	0	0	0	0	0	0	0	0	0	0	0	0	0	0	0	0	0	0	0	0	0	0
Bacteria|Cyanobacteria|Melainabacteria|Obscuribacterales	0	0	0	0	0	0	0	0	0	0	0	0	0	0	0	0	0	0	0	0	0	0	0	0	0	0	0	0	0	0	0	0	0	0	0	0	0	0	0	0	0	0	0	0	0	0	0	0	0
Bacteria|Deferribacteres|Deferribacteres|Deferribacterales|Deferribacteraceae|Mucispirillum	0	0	0	0	0	0	0	0	0	0	0	0.000535619	0	0	0	0	0	0.000535619	0	0	0	0	0	0	0	0	0	0	0	0	0	0	0	0	0	0	0	0	0	0	0	0	0	0	0	0	0	0	0
Bacteria|Deinococcus_Thermus|Deinococci|Deinococcales|Deinococcaceae|Deinococcus	0	0	0	0	0	0	0	0	0	0	0	0	0	0	0	0	0	0	0	0	0	0	0	0	0	0	0	0	0	0	0	0	0	0	0	0	0	0	0	0	0	0	0	0	0	0	0	0	0
Bacteria|Deinococcus_Thermus|Deinococci|Thermales|Thermaceae|Thermus	0	0	0	0	0	0	0	0	0	0	0	0	0	0	0	0	0	0	0	0	0	0	0	0	0.0476701	0	0	0	0	0	0	0	0	0	0	0	0	0	0	0	0	0	0	0	0	0	0	0	0
Bacteria|Firmicutes|Bacilli|Bacillales	0	0	0	0	0	0	0	0	0	0	0	0	0	0	0	0	0	0	0	0	0	0	0	0	0	0	0	0.0401714	0	0	0	0	0	0	0	0	0	0	0	0	0	0	0	0	0	0	0	0	0
Bacteria|Firmicutes|Bacilli|Bacillales|Alicyclobacillaceae|Alicyclobacillus	0	0	0	0	0	0	0	0	0	0	0	0	0	0	0	0	0	0	0	0	0	0	0	0	0	0	0	0	0	0	0	0	0	0	0	0	0	0	0	0	0	0	0	0	0	0	0	0	0
Bacteria|Firmicutes|Bacilli|Bacillales|Bacillaceae|Anoxybacillus	0	0	0	0	0	0	0	0	0	0	0	0	0	0	0	0	0	0	0	0	0	0	0	0	0	0	0	0	0	0	0	0	0	0	0	0	0	0	0	0	0	0	0	0	0	0	0.00244051	0	0
Bacteria|Firmicutes|Bacilli|Bacillales|Bacillaceae|Bacillus	0	0	0	0	0	0	0	0	0	0	0	0	0	0	0	0	0.000535619	0	0	0	0	0	0	0	0	0	0	0	0	0.00214247	0	0	0	0	0	0	0	0	0	0	0	0	0	0	0	0	0	0	0
Bacteria|Firmicutes|Bacilli|Bacillales|Bacillaceae|Caldibacillus	0	0	0	0	0	0	0	0	0	0	0	0	0	0	0	0	0	0	0	0	0	0	0	0	0	0	0	0	0	0	0	0	0	0	0	0	0	0	0	0	0	0	0	0	0	0	0	0	0
Bacteria|Firmicutes|Bacilli|Bacillales|Bacillaceae|Geobacillus	0	0	0	0	0	0	0	0	0	0	0	0	0	0.00321371	0	0	0.00160686	0	0.00214247	0.00589181	0	0.00107124	0.00749866	0	0.0144617	0.00696304	0	0.00214247	0	0	0	0	0	0	0	0	0	0	0	0	0	0	0	0	0	0	0	0	0
Bacteria|Firmicutes|Bacilli|Bacillales|Bacillaceae|Lentibacillus	0	0	0	0	0	0	0	0	0	0	0	0	0	0	0	0	0	0	0	0	0	0	0	0	0	0	0	0	0	0	0	0.00160686	0	0	0	0	0	0	0	0	0	0	0	0	0	0	0	0	0
Bacteria|Firmicutes|Bacilli|Bacillales|Bacillaceae|Oceanobacillus	0	0	0	0	0	0	0	0	0	0	0	0	0	0	0	0	0	0	0	0	0	0	0	0	0	0.00482057	0	0	0.00374933	0	0	0	0	0	0	0	0	0	0	0	0	0	0	0	0	0	0	0	0
Bacteria|Firmicutes|Bacilli|Bacillales|Bacillaceae|Terribacillus	0	0	0	0	0	0	0	0	0	0	0	0	0	0	0.0208891	0	0	0	0	0	0	0	0	0	0	0	0	0	0	0	0	0	0	0	0	0	0	0	0	0	0	0	0	0	0	0	0	0	0
Bacteria|Firmicutes|Bacilli|Bacillales|Paenibacillaceae|Paenibacillus	0	0	0	0	0	0	0	0	0	0	0	0	0.00428495	0.00803428	0	0.00428495	0.00374933	0.000535619	0	0.000535619	0	0	0	0.092662	0	0.00749866	0	0	0.00696304	0	0	0	0	0	0	0	0	0	0	0	0	0	0	0	0	0	0	0	0
Bacteria|Firmicutes|Bacilli|Bacillales|Planococcaceae|Kurthia	0	0	0	0	0	0	0	0	0	0	0	0	0	0	0	0	0	0	0	0	0	0.00107124	0	0	0	0	0	0	0	0.0107124	0	0	0	0	0	0	0	0	0	0	0	0	0	0	0	0	0	0	0
Bacteria|Firmicutes|Bacilli|Bacillales|Planococcaceae|Sporosarcina	0	0	0	0	0	0	0	0	0	0	0	0	0	0	0	0.00696304	0	0	0	0	0	0	0	0	0	0	0	0	0	0	0	0	0	0	0	0	0	0	0	0	0	0	0	0	0	0	0	0	0
Bacteria|Firmicutes|Bacilli|Bacillales|Staphylococcaceae|Jeotgalicoccus	0	0	0	0	0	0	0	0	0	0	0	0	0	0	0	0	0	0	0	0	0	0	0	0	0	0	0	0	0	0	0	0	0	0	0	0	0	0	0	0	0	0	0	0	0	0	0	0	0
Bacteria|Firmicutes|Bacilli|Bacillales|Staphylococcaceae|Staphylococcus	0	0	0	0	0	0	0	0	0	0	0	0	0.00428495	0.00803428	0	0	0.00374933	0	0.00267809	0.000535619	0	0	0	0.00910552	0	0.00267809	0.00321371	0.00428495	0.00642742	0.0283878	0	0.00428495	0	0	0	0	0	0	0	0	0	0	0	0	0	0	0.00122026	0.0134228	0.00183038
Bacteria|Firmicutes|Bacilli|Bacillales|Thermoactinomycetaceae|Thermoactinomyces	0	0	0	0	0	0	0	0	0	0	0	0	0	0	0	0	0	0	0	0	0	0	0	0	0	0	0	0	0	0	0	0	0	0	0	0	0	0	0	0	0	0	0	0	0	0	0	0	0
Bacteria|Firmicutes|Bacilli|Lactobacillales|Aerococcaceae|Abiotrophia	0	0	0	0	0	0	0	0	0	0	0	0	0	0	0	0	0	0	0	0	0	0	0	0	0	0	0	0	0	0	0	0	0	0	0	0	0	0	0	0	0	0	0	0	0	0	0	0	0
Bacteria|Firmicutes|Bacilli|Lactobacillales|Aerococcaceae|Aerococcus	0	0	0	0	0	0	0	0	0	0	0	0	0	0	0	0.00107124	0	0	0	0	0	0	0	0	0	0	0	0	0	0	0	0	0	0	0	0	0	0	0	0	0	0	0	0	0	0	0	0	0
Bacteria|Firmicutes|Bacilli|Lactobacillales|Carnobacteriaceae|Atopostipes	0	0	0	0	0	0	0	0	0	0	0	0	0	0	0	0	0	0	0	0	0	0	0	0	0	0	0	0	0	0	0	0	0	0	0	0	0	0	0	0	0	0	0	0	0	0	0	0	0
Bacteria|Firmicutes|Bacilli|Lactobacillales|Carnobacteriaceae|Desemzia	0	0	0	0	0	0	0	0	0	0	0	0	0	0	0	0	0	0	0	0.00910552	0	0	0	0	0	0	0	0	0	0	0	0	0	0	0	0	0	0	0	0	0	0	0	0	0	0	0	0	0
Bacteria|Firmicutes|Bacilli|Lactobacillales|Carnobacteriaceae|Granulicatella	0	0	0	0	0	0	0	0	0	0	0	0	0	0	0	0	0	0	0	0	0	0	0	0	0	0	0	0	0	0	0	0	0	0	0	0	0	0	0	0	0	0	0	0	0	0	0	0	0
Bacteria|Firmicutes|Bacilli|Lactobacillales|Carnobacteriaceae|Marinilactibacillus	0	0	0	0	0	0	0	0	0	0	0	0	0	0	0	0	0	0	0	0	0	0	0	0	0	0	0	0	0	0	0	0	0	0	0	0	0	0	0	0	0	0	0	0	0	0	0	0	0
Bacteria|Firmicutes|Bacilli|Lactobacillales|Enterococcaceae|Enterococcus	0	0	0	0	0	0	0	0	0	0	0	0	0	0	0	0	0	0	0	0	0	0	0	0	0	0	0	0	0	0	0	0	0	0	0	0	0	0	0	0	0	0	0	0	0	0	0	0	0
Bacteria|Firmicutes|Bacilli|Lactobacillales|Lactobacillaceae|Lactobacillus	0.0482057	0.0401714	0.0101768	0.0085699	0.0171398	0.0198179	0.00910552	0.0107124	0.0246385	0.0219604	0.0208891	0.0101768	0.00482057	0.00803428	0.018211	0.00696304	0.022496	0.0187467	0.00642742	0.00535619	0.0155329	0.0085699	0	0.00535619	0.00428495	0.000535619	0.000535619	0.00910552	0.00589181	0.00107124	0.0626674	0.00428495	0.00482057	0.0246385	0.0155329	0.00482057	0.0085699	0.0299946	0.0203535	0.0133905	0.00482057	0.018211	0.0101768	0.0160686	0.00589181	0.0198179	0.0677242	0.0115924	0.510677
Bacteria|Firmicutes|Bacilli|Lactobacillales|Lactobacillaceae|Pediococcus	0	0	0	0	0	0	0	0	0	0	0	0	0	0.00160686	0	0.00267809	0	0	0	0	0	0	0	0.00321371	0	0.00535619	0	0	0	0	0	0.00214247	0	0	0	0	0	0	0	0	0	0	0	0	0	0	0	0	0
Bacteria|Firmicutes|Bacilli|Lactobacillales|Leuconostocaceae|Leuconostoc	0	0	0	0	0	0	0	0	0	0	0	0	0	0	0	0	0	0	0	0	0	0	0	0	0	0	0	0	0	0	0	0	0	0	0	0	0	0	0	0	0	0	0	0	0	0	0	0	0
Bacteria|Firmicutes|Bacilli|Lactobacillales|Leuconostocaceae|Weissella	0	0	0	0	0	0	0	0	0	0	0	0	0.00374933	0.00910552	0.0107124	0.00696304	0.0149973	0	0.00374933	0.00428495	0	0.00964114	0.00482057	0.00107124	0.0235672	0	0.000535619	0	0	0.00482057	0	0.00107124	0	0	0	0	0	0	0	0	0	0	0	0	0	0	0	0	0
Bacteria|Firmicutes|Bacilli|Lactobacillales|Streptococcaceae|Lactococcus	0	0	0	0	0	0	0	0	0	0	0	0	0	0	0	0	0.00803428	0	0	0	0	0	0	0	0	0	0	0	0	0	0	0	0	0	0	0	0	0	0	0	0	0	0	0	0	0	0	0	0
Bacteria|Firmicutes|Bacilli|Lactobacillales|Streptococcaceae|Streptococcus	0	0	0	0	0	0	0	0	0	0	0	0	0.12962	0.0782003	0.0942689	0.0648099	0.0798072	0.0342796	0.0551687	0.0696304	0	0.0476701	0.0594537	0.0776647	0.096947	0.186395	0.0540975	0.0985538	0.15158	0.159079	0	0.0444563	0.000535619	0	0	0	0	0.000535619	0	0	0	0	0	0	0	0	0.0213545	0.0414887	0.0457596
Bacteria|Firmicutes|Clostridia|Clostridiales	0.0717729	0.0546331	0.0492769	0.0455276	0.0283878	0.0273166	0.0332084	0.0605249	0.096947	0.0342796	0.0669523	0.0664167	0.0664167	0.118372	0.0498125	0.0492769	0.0230316	0.0401714	0.136583	0.029459	0.0717729	0.0583824	0.101232	0.0198179	0.0364221	0	0.0230316	0.00107124	0.051955	0.029459	0.0498125	0.0171398	0.0605249	0.0128548	0.00803428	0.0326727	0.00107124	0.00374933	0.00696304	0.0530262	0.0417783	0.0374933	0.0321371	0.0374933	0.0396358	0.0610605	0.108603	0.183649	0.0555217
Bacteria|Firmicutes|Clostridia|Clostridiales|Christensenellaceae	0	0	0	0	0	0	0	0	0	0	0	0	0	0	0	0	0	0.00267809	0.00642742	0	0	0	0	0	0	0	0	0	0	0	0	0	0	0	0	0	0.00160686	0	0.00107124	0	0	0	0	0	0	0	0	0	0
Bacteria|Firmicutes|Clostridia|Clostridiales|Defluviitaleaceae	0	0	0	0	0	0	0	0	0	0	0	0	0	0	0	0	0	0	0	0	0	0	0	0	0	0	0	0	0	0	0	0	0	0	0	0	0	0	0	0	0	0	0	0	0	0	0	0	0
Bacteria|Firmicutes|Clostridia|Clostridiales|Eubacteriaceae|Anaerofustis	0	0	0	0	0	0	0	0	0	0	0	0	0	0	0	0	0	0	0	0	0	0	0	0	0	0	0	0	0	0	0	0	0	0	0	0	0	0	0	0	0	0	0	0	0	0	0	0	0
Bacteria|Firmicutes|Clostridia|Clostridiales|Lachnospiraceae	0.0524906	0.0428495	0.13444	0.130155	0.0192823	0.0482057	0.0964114	0.202464	0.175147	0.0230316	0.081414	0.11248	0.0101768	0.022496	0.0664167	0.0540975	0.0155329	0.0369577	0.00803428	0	0.106588	0.0460632	0.0412426	0.00696304	0.00107124	0	0.0123192	0.0305303	0.0149973	0.0101768	0.137654	0.0380289	0.294055	0.0674879	0.0262453	0.0873058	0.0257097	0.0567756	0.0187467	0.0974826	0.0214247	0.0508838	0.181575	0.0176754	0.167113	0.096947	0.0744356	0.0311165	0.00976205
Bacteria|Firmicutes|Clostridia|Clostridiales|Lachnospiraceae|Acetitomaculum	0.000535619	0	0.00160686	0.00107124	0	0.00267809	0.00321371	0.00267809	0.000535619	0.000535619	0.00107124	0.00428495	0	0	0	0	0	0	0	0	0	0	0	0	0	0	0	0	0	0	0.00160686	0	0.000535619	0.000535619	0	0	0	0	0	0	0	0	0.000535619	0	0.00107124	0.00160686	0	0	0
Bacteria|Firmicutes|Clostridia|Clostridiales|Lachnospiraceae|Anaerostipes	0	0	0	0	0	0	0	0	0	0	0	0	0	0	0	0.0101768	0	0	0	0	0	0	0.00160686	0	0	0	0	0	0	0	0	0.0101768	0	0	0	0	0	0	0	0	0	0	0	0	0	0	0	0	0
Bacteria|Firmicutes|Clostridia|Clostridiales|Lachnospiraceae|Blautia	0	0	0.000535619	0	0	0	0.000535619	0	0	0	0.000535619	0.00107124	0	0	0	0	0	0	0	0	0	0	0	0	0	0	0	0	0	0	0	0	0	0	0	0	0	0	0	0.00107124	0	0	0	0	0.000535619	0	0	0	0
Bacteria|Firmicutes|Clostridia|Clostridiales|Lachnospiraceae|Epulopiscium	0	0	0	0	0	0	0	0	0	0	0	0	0	0	0	0	0	0	0	0	0	0	0	0	0	0	0	0	0	0	0	0	0	0	0	0	0	0	0	0	0	0	0	0	0	0	0	0	0
Bacteria|Firmicutes|Clostridia|Clostridiales|Lachnospiraceae|Fusicatenibacter	0	0	0	0	0	0	0	0	0	0	0	0	0	0	0.0235672	0	0	0	0	0	0	0	0.00214247	0	0	0	0	0	0	0	0	0.00321371	0	0	0	0	0	0	0	0	0	0	0	0	0	0	0	0	0
Bacteria|Firmicutes|Clostridia|Clostridiales|Lachnospiraceae|Lachnoanaerobaculum	0	0	0	0	0	0	0	0	0	0	0	0	0	0	0	0	0	0	0	0	0	0	0	0	0	0	0	0	0	0	0	0	0	0	0	0	0	0	0	0	0	0	0	0	0	0	0	0	0
Bacteria|Firmicutes|Clostridia|Clostridiales|Lachnospiraceae|Lachnoclostridium	0.00321371	0.00107124	0.00267809	0.00160686	0	0	0.00107124	0.00267809	0.00321371	0.00160686	0.00374933	0.00214247	0	0	0	0.00749866	0.00267809	0	0	0	0.00964114	0	0	0.00910552	0	0	0	0.0203535	0	0.0171398	0.00696304	0.018211	0.00267809	0.00374933	0.00107124	0.000535619	0.000535619	0.000535619	0.000535619	0.00321371	0.00267809	0.00214247	0.00321371	0	0	0.00214247	0.0726052	0.0482001	0.0378279
Bacteria|Firmicutes|Clostridia|Clostridiales|Lachnospiraceae|Lachnospira	0	0	0	0	0	0	0	0	0	0	0	0	0	0	0	0	0	0	0	0	0	0	0	0	0	0	0	0	0	0	0	0	0	0	0	0	0	0	0	0	0	0	0	0	0	0	0	0	0
Bacteria|Firmicutes|Clostridia|Clostridiales|Lachnospiraceae|Marvinbryantia	0.00107124	0.00321371	0.00428495	0.000535619	0	0.00160686	0.000535619	0.000535619	0.00267809	0.000535619	0.00107124	0	0.00160686	0	0	0	0	0	0	0	0.00214247	0	0.00267809	0	0	0	0	0	0	0	0.0139261	0	0.00107124	0.00321371	0	0.00107124	0	0	0	0.00160686	0.000535619	0.000535619	0	0.000535619	0.000535619	0.00107124	0	0	0.0109823
Bacteria|Firmicutes|Clostridia|Clostridiales|Lachnospiraceae|Oribacterium	0	0	0	0	0	0	0	0	0	0	0	0	0	0	0	0	0	0	0	0	0	0	0	0	0	0	0	0	0	0	0	0	0	0	0	0	0	0	0	0	0	0	0	0	0	0	0	0	0
Bacteria|Firmicutes|Clostridia|Clostridiales|Lachnospiraceae|Roseburia	0.00428495	0.00160686	0.00589181	0.0171398	0.00214247	0.00589181	0.00482057	0.0149973	0.0155329	0.00374933	0.0192823	0.0283878	0.00803428	0	0.000535619	0	0.00428495	0	0.0149973	0	0.0107124	0.00803428	0.0085699	0	0.00589181	0	0	0	0	0	0.0160686	0.00803428	0.0257097	0.00321371	0.00267809	0.011248	0.000535619	0.00214247	0.00428495	0.00428495	0.00642742	0.00642742	0.0144617	0.00214247	0.00696304	0.0107124	0	0.00122026	0
Bacteria|Firmicutes|Clostridia|Clostridiales|Lachnospiraceae|Sellimonas	0	0	0	0	0	0	0	0	0	0	0	0	0	0	0	0	0	0	0	0	0	0	0	0	0	0	0	0	0	0	0	0	0	0	0	0	0	0	0	0	0	0	0	0	0	0	0	0	0
Bacteria|Firmicutes|Clostridia|Clostridiales|Lachnospiraceae|Stomatobaculum	0	0	0	0	0	0	0	0	0	0	0	0	0	0	0	0	0	0	0	0	0	0	0	0	0	0	0	0	0	0	0	0	0	0	0	0	0	0	0	0	0	0	0	0	0	0	0	0	0
Bacteria|Firmicutes|Clostridia|Clostridiales|Lachnospiraceae|Tyzzerella	0	0	0.000535619	0	0	0	0	0	0.000535619	0	0	0	0	0	0	0	0	0	0	0	0.000535619	0	0	0	0	0	0	0	0	0	0	0	0.000535619	0.000535619	0	0.000535619	0.000535619	0	0	0.00160686	0	0.000535619	0.00107124	0	0	0	0	0	0
Bacteria|Firmicutes|Clostridia|Clostridiales|Peptococcaceae	0	0	0.000535619	0	0	0	0.000535619	0.000535619	0	0	0	0	0	0	0	0	0	0	0	0	0	0.00321371	0	0	0	0	0	0	0	0	0	0	0.000535619	0.000535619	0	0	0.00107124	0	0.000535619	0	0	0.000535619	0.00267809	0	0.000535619	0.000535619	0	0	0
Bacteria|Firmicutes|Clostridia|Clostridiales|Peptococcaceae|Desulfotomaculum	0	0	0	0	0	0	0	0	0	0	0	0	0	0	0	0	0	0	0	0.00589181	0	0	0	0	0	0	0	0	0	0	0	0	0	0	0	0	0	0	0	0	0	0	0	0	0	0	0	0	0
Bacteria|Firmicutes|Clostridia|Clostridiales|Peptococcaceae|Peptococcus	0	0	0	0	0	0	0	0	0	0	0	0	0	0	0	0	0	0	0	0	0	0	0	0	0	0	0	0	0	0	0	0	0	0	0	0	0	0	0	0	0	0	0	0	0	0	0	0	0
Bacteria|Firmicutes|Clostridia|Clostridiales|Peptostreptococcaceae|Intestinibacter	0	0	0	0	0	0	0	0	0	0	0	0	0.00749866	0.00749866	0.0717729	0.167649	0.0283878	0	0.000535619	0	0	0	0.101232	0.0332084	0.0739154	0.0262453	0	0.0235672	0.00428495	0.0455276	0	0.10391	0	0	0	0	0	0	0	0	0	0	0	0	0	0	0	0	0
Bacteria|Firmicutes|Clostridia|Clostridiales|Peptostreptococcaceae|Paeniclostridium	0	0	0	0	0	0	0	0	0	0	0	0	0	0	0	0	0	0	0	0	0	0	0	0	0	0	0	0	0	0	0	0	0	0	0	0	0	0	0	0	0	0	0	0	0	0	0.0164735	0.0353874	0.00854179
Bacteria|Firmicutes|Clostridia|Clostridiales|Peptostreptococcaceae|Peptoclostridium	0	0	0	0	0	0	0	0	0	0	0	0	0	0.0101768	0	0	0	0.0085699	0	0	0	0.00214247	0	0	0	0	0	0	0.0230316	0	0	0.00321371	0	0	0	0	0	0	0	0	0	0	0	0	0	0	0	0	0
Bacteria|Firmicutes|Clostridia|Clostridiales|Peptostreptococcaceae|Peptostreptococcus	0	0	0	0	0	0	0	0	0	0	0	0	0	0.00160686	0	0	0	0	0	0	0	0	0	0.0133905	0	0.00482057	0	0.0085699	0.000535619	0	0	0	0	0	0	0	0	0	0	0	0	0	0	0	0	0	0.00488103	0	0
Bacteria|Firmicutes|Clostridia|Clostridiales|Peptostreptococcaceae|Romboutsia	0	0	0	0	0	0	0	0	0.00214247	0	0	0	0	0.00749866	0	0	0	0.000535619	0	0.000535619	0	0	0	0	0	0	0	0	0	0	0	0	0	0	0	0	0	0	0	0	0	0	0	0	0.000535619	0	0.0225747	0.0469799	0.00244051
Bacteria|Firmicutes|Clostridia|Clostridiales|Peptostreptococcaceae|Terrisporobacter	0	0	0	0	0	0	0	0	0	0	0	0	0	0	0	0	0	0	0	0	0	0	0	0	0	0	0	0	0	0	0	0	0	0	0	0	0	0	0	0	0	0	0	0	0	0	0.000610128	0.0103722	0.00183038
Bacteria|Firmicutes|Clostridia|Clostridiales|Ruminococcaceae	0.0685592	0.120514	0.121585	0.214783	0.132298	0.261918	0.198715	0.074451	0.040707	0.186395	0.123192	0.170862	0.0396358	0.0369577	0.0117836	0.0310659	0.0257097	0.0771291	0.0267809	0.00589181	0.119979	0.0712373	0.0428495	0.0299946	0.0257097	0.00642742	0.0396358	0.0149973	0.00696304	0.0573112	0.0567756	0.0289234	0.156936	0.0974826	0.0439207	0.101768	0.0358864	0.0203535	0.0755222	0.115694	0.312266	0.0241028	0.0439207	0.217997	0.0974826	0.123728	0.0219646	0.023795	0.0262355
Bacteria|Firmicutes|Clostridia|Clostridiales|Ruminococcaceae|Anaerobacterium	0	0	0	0	0	0	0	0	0	0	0	0	0	0	0	0	0	0	0	0	0	0	0	0	0	0	0	0	0	0	0	0	0	0	0	0	0	0	0	0	0	0	0	0	0	0	0	0	0
Bacteria|Firmicutes|Clostridia|Clostridiales|Ruminococcaceae|Anaerofilum	0	0	0	0	0	0	0	0	0	0	0	0	0	0	0	0	0	0	0	0	0	0	0	0	0	0	0	0	0	0	0	0	0	0	0	0	0	0	0	0	0	0	0	0	0	0	0	0	0
Bacteria|Firmicutes|Clostridia|Clostridiales|Ruminococcaceae|Anaerotruncus	0.00214247	0.00107124	0.00160686	0.00107124	0	0.000535619	0.00482057	0.0128548	0.00214247	0.00107124	0.00321371	0.000535619	0	0	0	0	0.0139261	0	0	0	0.00160686	0.00107124	0	0	0.00749866	0	0	0	0	0	0.00267809	0	0.00589181	0.000535619	0.000535619	0.00321371	0	0.000535619	0	0.000535619	0	0	0.00321371	0	0.000535619	0.00267809	0	0	0
Bacteria|Firmicutes|Clostridia|Clostridiales|Ruminococcaceae|Butyricicoccus	0.000535619	0	0	0	0	0	0.00160686	0.000535619	0	0	0	0	0	0	0	0	0	0	0	0	0	0.000535619	0	0	0	0	0	0	0	0	0	0	0.00107124	0	0	0	0	0	0	0.000535619	0	0	0.000535619	0	0	0	0	0	0
Bacteria|Firmicutes|Clostridia|Clostridiales|Ruminococcaceae|Caproiciproducens	0	0	0	0	0	0	0	0	0	0	0	0	0	0	0	0	0	0	0	0	0	0	0	0	0	0	0	0	0	0	0	0	0	0	0	0	0	0	0	0	0	0	0	0	0	0	0	0	0
Bacteria|Firmicutes|Clostridia|Clostridiales|Ruminococcaceae|Faecalibacterium	0	0	0	0	0	0	0	0	0.000535619	0	0	0	0	0	0	0	0	0	0	0	0	0	0	0	0	0.00642742	0	0.0187467	0	0	0	0	0	0	0	0	0	0	0	0	0	0	0	0	0	0	0	0	0
Bacteria|Firmicutes|Clostridia|Clostridiales|Ruminococcaceae|Flavonifractor	0	0	0	0	0	0	0	0	0	0	0	0	0	0	0	0	0	0	0	0	0	0	0	0	0	0	0	0	0	0	0	0	0	0	0	0	0	0	0	0	0	0	0	0	0	0	0	0	0
Bacteria|Firmicutes|Clostridia|Clostridiales|Ruminococcaceae|Hydrogenoanaerobacterium	0	0	0	0	0	0	0	0	0	0	0	0	0	0.00214247	0	0	0	0	0	0	0	0	0	0	0	0	0	0	0	0	0	0	0	0	0	0	0	0	0	0	0	0	0	0	0	0	0	0	0
Bacteria|Firmicutes|Clostridia|Clostridiales|Ruminococcaceae|Intestinimonas	0	0	0	0	0	0	0	0	0	0	0	0	0	0	0	0	0	0	0	0	0	0	0	0	0	0	0	0	0	0	0	0	0	0	0	0	0	0	0	0	0	0	0	0	0	0	0.00610128	0	0
Bacteria|Firmicutes|Clostridia|Clostridiales|Ruminococcaceae|Oscillibacter	0.00267809	0.00642742	0.0117836	0.00374933	0.000535619	0.011248	0.00482057	0.011248	0.0149973	0.00267809	0.0101768	0.0085699	0.000535619	0	0	0	0.00803428	0	0	0	0.011248	0	0.011248	0	0	0	0	0.0144617	0	0	0.00749866	0.00267809	0.0573112	0.011248	0.00374933	0.0299946	0.00642742	0.00910552	0.0085699	0.0208891	0.00964114	0.0085699	0.00374933	0.000535619	0.0133905	0.00482057	0.00793167	0	0
Bacteria|Firmicutes|Clostridia|Clostridiales|Ruminococcaceae|Ruminiclostridium	0.00160686	0.000535619	0.00374933	0.000535619	0	0.00321371	0	0.00642742	0.0123192	0.000535619	0.00482057	0.00214247	0	0	0	0	0	0	0	0	0.00803428	0	0	0	0	0	0	0	0	0	0.00482057	0	0.00160686	0.00267809	0.00267809	0.00160686	0.000535619	0.000535619	0	0.000535619	0	0.00107124	0.00160686	0	0.000535619	0.00374933	0.0103722	0	0
Bacteria|Firmicutes|Clostridia|Clostridiales|Ruminococcaceae|Subdoligranulum	0	0	0	0	0	0	0	0	0	0	0	0	0	0	0	0	0	0	0	0	0	0	0	0	0	0.00535619	0	0	0	0	0	0.0101768	0	0	0	0	0	0	0	0	0	0	0	0	0	0	0	0	0
Bacteria|Firmicutes|Clostridia|Halanaerobiales	0	0	0	0	0	0	0	0	0	0	0	0	0	0	0	0	0	0	0	0	0	0	0	0	0	0	0	0	0	0	0	0	0	0	0	0	0	0	0	0	0	0	0	0	0	0	0.00122026	0	0
Bacteria|Firmicutes|Clostridia|Halanaerobiales|Halanaerobiaceae|Halanaerobium	0	0	0	0	0	0	0	0	0	0	0	0	0	0	0	0	0	0	0	0	0	0	0	0	0	0	0	0	0	0	0	0	0	0	0	0	0	0	0	0	0	0	0	0	0	0	0	0	0
Bacteria|Firmicutes|Clostridia|Thermoanaerobacterales	0	0	0	0	0	0	0	0	0	0	0	0	0	0	0	0	0	0	0	0	0	0	0	0	0	0	0	0	0	0	0	0	0	0	0	0	0	0	0	0	0	0	0	0	0	0	0	0	0
Bacteria|Firmicutes|Erysipelotrichia|Erysipelotrichales|Erysipelotrichaceae	0	0.000535619	0	0.00107124	0	0	0.000535619	0	0	0.000535619	0	0.000535619	0	0	0	0	0	0.00160686	0	0	0.000535619	0.00160686	0	0	0	0	0	0	0	0	0	0	0.00107124	0.000535619	0	0.00160686	0.000535619	0.000535619	0.000535619	0	0.000535619	0	0.00107124	0.000535619	0.000535619	0	0.00549115	0.00305064	0.00549115
Bacteria|Firmicutes|Erysipelotrichia|Erysipelotrichales|Erysipelotrichaceae|Allobaculum	0	0	0	0	0	0	0	0	0	0	0	0	0.00589181	0	0	0	0.00482057	0	0.00642742	0	0	0	0.0149973	0	0	0.0176754	0	0	0	0	0	0	0	0	0	0	0	0	0	0	0	0	0	0	0	0	0	0	0
Bacteria|Firmicutes|Erysipelotrichia|Erysipelotrichales|Erysipelotrichaceae|Catenibacterium	0	0	0	0	0	0	0	0	0	0	0	0	0	0	0	0	0	0	0	0.00321371	0	0	0	0	0	0	0	0	0	0	0	0	0	0	0	0	0	0	0	0	0	0	0	0	0	0	0	0	0
Bacteria|Firmicutes|Erysipelotrichia|Erysipelotrichales|Erysipelotrichaceae|Erysipelatoclostridium	0	0.00267809	0	0.000535619	0.000535619	0.000535619	0	0	0.00160686	0.000535619	0	0.000535619	0	0	0.00267809	0	0	0.00321371	0	0	0	0	0	0	0	0	0	0	0	0	0.00214247	0	0.00107124	0.00160686	0	0.000535619	0.00214247	0.00482057	0.000535619	0.00482057	0.000535619	0	0.000535619	0.00267809	0	0.000535619	0	0.00244051	0
Bacteria|Firmicutes|Erysipelotrichia|Erysipelotrichales|Erysipelotrichaceae|Faecalibaculum	0	0	0	0	0	0	0	0	0	0	0	0	0	0	0	0	0	0	0	0	0	0	0	0	0	0	0	0	0	0	0	0.00160686	0	0	0	0	0	0.00107124	0.000535619	0	0	0	0	0	0	0	0	0	0
Bacteria|Firmicutes|Erysipelotrichia|Erysipelotrichales|Erysipelotrichaceae|Holdemanella	0	0	0	0	0	0	0	0	0	0	0	0	0	0	0	0	0	0	0	0	0	0	0	0	0	0	0	0	0	0	0	0	0	0	0	0	0	0	0	0	0	0	0	0	0	0	0.00610128	0	0
Bacteria|Firmicutes|Erysipelotrichia|Erysipelotrichales|Erysipelotrichaceae|Solobacterium	0	0	0	0	0	0	0	0	0	0	0	0	0	0	0	0	0	0	0	0	0	0	0	0	0	0	0	0	0	0	0	0	0	0	0	0	0	0	0	0	0	0	0	0	0	0	0	0.00122026	0.00244051
Bacteria|Firmicutes|Erysipelotrichia|Erysipelotrichales|Erysipelotrichaceae|Turicibacter	0.0465988	0.0219604	0.040707	0.0299946	0.0219604	0.0208891	0.0567756	0.0610605	0.147831	0.0192823	0.0310659	0.0139261	0.0433851	0.0198179	0.0171398	0.0203535	0.00160686	0.0230316	0.0299946	0.0166042	0.0439207	0.0385645	0.0299946	0	0.0160686	0.00910552	0	0.0219604	0.0374933	0.0176754	0.0739154	0.00803428	0.0107124	0.0342796	0.0385645	0.0144617	0.00321371	0.00964114	0.00910552	0.0305303	0.011248	0.0219604	0.074451	0.0198179	0.0171398	0.081414	0.0201342	0.0103722	0.00976205
Bacteria|Firmicutes|Negativicutes|Selenomonadales|Acidaminococcaceae|Phascolarctobacterium	0	0	0	0	0	0	0	0	0	0	0	0.000535619	0	0	0	0	0	0	0.00749866	0	0	0	0	0	0.022496	0	0	0	0	0.00535619	0	0	0	0	0	0	0	0	0	0	0	0	0	0	0	0	0	0	0
Bacteria|Firmicutes|Negativicutes|Selenomonadales|Veillonellaceae	0	0	0	0	0	0	0	0	0	0	0	0	0	0	0	0	0	0	0	0	0	0	0	0	0	0	0	0	0	0	0	0	0	0	0	0	0	0	0	0	0	0	0	0	0	0	0	0	0
Bacteria|Firmicutes|Negativicutes|Selenomonadales|Veillonellaceae|Anaerovibrio	0	0	0	0	0	0	0	0	0	0	0	0	0	0	0	0	0	0	0	0	0	0	0	0	0	0	0	0	0	0	0	0	0	0	0	0	0	0	0	0	0	0	0	0	0	0	0	0	0
Bacteria|Firmicutes|Negativicutes|Selenomonadales|Veillonellaceae|Dialister	0	0	0	0	0	0	0	0	0	0	0	0	0	0	0	0	0	0	0	0	0	0	0	0	0	0	0	0.0171398	0	0	0	0.00107124	0	0	0	0	0	0	0	0	0	0	0	0	0	0	0	0	0
Bacteria|Firmicutes|Negativicutes|Selenomonadales|Veillonellaceae|Megasphaera	0	0	0	0	0	0	0	0	0	0	0	0	0	0	0	0	0	0	0	0	0	0	0	0	0	0	0	0	0	0	0	0	0	0	0	0	0	0	0	0	0	0	0	0	0	0	0	0	0
Bacteria|Firmicutes|Negativicutes|Selenomonadales|Veillonellaceae|Negativicoccus	0	0	0	0	0	0	0	0	0	0	0	0	0	0	0	0	0	0	0	0	0	0	0	0	0	0	0	0	0	0	0	0	0	0	0	0	0	0	0	0	0	0	0	0	0	0	0	0	0
Bacteria|Firmicutes|Negativicutes|Selenomonadales|Veillonellaceae|Veillonella	0	0	0	0	0	0	0	0	0	0	0	0	0	0	0	0.0128548	0	0	0	0	0	0	0	0	0	0	0	0	0	0	0	0	0	0	0	0	0	0	0	0	0	0	0	0	0	0	0	0	0
Bacteria|Fusobacteria|Fusobacteriia|Fusobacteriales|Fusobacteriaceae|Fusobacterium	0	0	0	0	0	0	0	0	0	0	0	0	0.0321371	0.0133905	0.0412426	0.0471344	0.0171398	0.00321371	0.0171398	0.0326727	0	0	0.00910552	0	0.109802	0	0.0658811	0.0776647	0.0278522	0.0257097	0	0.00482057	0	0	0	0	0	0	0	0	0	0	0	0	0	0	0	0	0
Bacteria|Fusobacteria|Fusobacteriia|Fusobacteriales|Leptotrichiaceae|Leptotrichia	0	0	0	0	0	0	0	0	0	0	0	0	0	0	0	0	0	0	0	0	0	0	0	0	0	0	0	0	0	0	0	0	0	0	0	0	0	0	0	0	0	0	0	0	0	0	0	0	0
Bacteria|Gemmatimonadetes|Gemmatimonadetes|Gemmatimonadales|Gemmatimonadaceae	0	0	0	0	0	0	0	0	0	0	0	0	0	0	0	0	0	0	0	0.00428495	0	0	0	0	0	0	0	0	0	0	0	0	0	0	0	0	0	0	0	0	0	0	0	0	0	0	0	0	0
Bacteria|Ignavibacteriae|Ignavibacteria|Ignavibacteriales	0	0	0	0	0	0	0	0	0	0	0	0	0	0	0	0	0	0	0	0	0	0	0	0	0	0	0	0	0	0	0	0	0	0	0	0	0	0	0	0	0	0	0	0	0	0	0	0	0
Bacteria|Ignavibacteriae|Ignavibacteria|Ignavibacteriales|Ignavibacteriaceae|Ignavibacterium	0	0	0	0	0	0	0	0	0	0	0	0	0	0	0	0	0	0	0	0	0	0	0	0	0	0	0	0	0	0	0	0	0	0	0	0	0	0	0	0	0	0	0	0	0	0	0	0	0
Bacteria|Planctomycetes|Phycisphaerae|Phycisphaerales|Phycisphaeraceae	0	0	0	0	0	0	0	0	0	0	0	0	0	0	0	0	0	0	0	0	0	0	0	0	0	0	0	0	0	0	0	0	0	0	0	0	0	0	0	0	0	0	0	0	0	0	0	0	0
Bacteria|Planctomycetes|Phycisphaerae|Tepidisphaerales|Tepidisphaeraceae	0	0	0	0	0	0	0	0	0	0	0	0	0	0	0	0	0	0	0	0.00107124	0	0	0	0	0	0	0	0	0	0	0	0	0	0	0	0	0	0	0	0	0	0	0	0	0	0	0	0	0
Bacteria|Planctomycetes|Planctomycetacia|Planctomycetales|Planctomycetaceae	0	0	0	0	0	0	0	0	0	0	0	0	0	0	0	0	0	0	0	0	0	0	0	0	0	0	0	0	0	0	0	0	0	0	0	0	0	0	0	0	0	0	0	0	0	0	0	0	0
Bacteria|Planctomycetes|Planctomycetacia|Planctomycetales|Planctomycetaceae|Gemmata	0	0	0	0	0	0	0	0	0	0	0	0	0	0	0	0	0	0	0	0.00321371	0	0	0	0	0	0	0	0	0	0	0	0	0	0	0	0	0	0	0	0	0	0	0	0	0	0	0	0	0
Bacteria|Planctomycetes|Planctomycetacia|Planctomycetales|Planctomycetaceae|Planctomyces	0	0	0	0	0	0	0	0	0	0	0	0	0	0	0	0	0	0	0	0	0	0	0	0	0	0	0	0	0	0	0	0	0	0	0	0	0	0	0	0	0	0	0	0	0	0	0	0	0
Bacteria|Proteobacteria|Alphaproteobacteria	0	0	0	0	0	0	0	0	0	0	0	0	0	0	0	0	0	0	0	0	0	0	0	0	0	0	0	0	0	0	0	0	0	0	0	0	0	0	0	0	0	0	0	0	0	0	0	0	0
Bacteria|Proteobacteria|Alphaproteobacteria|Caulobacterales|Caulobacteraceae	0	0	0	0	0	0	0	0	0	0	0	0	0	0	0	0	0	0	0	0.0139261	0	0	0	0	0	0	0	0	0	0	0	0	0	0	0	0	0	0	0	0	0	0	0	0	0	0	0	0	0
Bacteria|Proteobacteria|Alphaproteobacteria|Caulobacterales|Caulobacteraceae|Asticcacaulis	0	0	0	0	0	0	0	0	0	0	0	0	0	0	0	0	0	0	0	0	0	0	0	0	0	0	0	0	0	0	0	0	0	0	0	0	0	0	0	0	0	0	0	0	0	0	0	0	0.00122026
Bacteria|Proteobacteria|Alphaproteobacteria|Caulobacterales|Caulobacteraceae|Brevundimonas	0	0	0	0	0	0	0	0	0	0	0	0	0	0	0	0	0	0	0	0	0	0	0	0	0	0	0	0	0	0	0	0	0	0	0	0	0	0	0	0	0	0	0	0	0	0	0.0103722	0	0
Bacteria|Proteobacteria|Alphaproteobacteria|Caulobacterales|Caulobacteraceae|Phenylobacterium	0	0	0	0	0	0	0	0	0	0	0	0	0	0	0	0.00160686	0	0	0	0.0208891	0	0	0	0	0	0	0	0	0	0	0	0	0	0	0	0	0	0	0	0	0	0	0	0	0	0	0	0	0
Bacteria|Proteobacteria|Alphaproteobacteria|Caulobacterales|Hyphomonadaceae|Hirschia	0	0	0	0	0	0	0	0	0	0	0	0	0	0	0	0	0	0	0	0	0	0	0	0	0	0	0	0	0	0	0	0	0	0	0	0	0	0	0	0	0	0	0	0	0	0	0	0	0
Bacteria|Proteobacteria|Alphaproteobacteria|Caulobacterales|Hyphomonadaceae|Woodsholea	0	0	0	0	0	0	0	0	0	0	0	0	0	0	0	0	0	0	0	0	0	0	0	0	0	0	0	0	0	0	0	0	0	0	0	0	0	0	0	0	0	0	0	0	0	0	0	0	0
Bacteria|Proteobacteria|Alphaproteobacteria|Rhizobiales	0	0	0	0	0	0	0	0	0	0	0	0	0	0	0	0	0	0	0	0.0155329	0	0	0	0	0	0	0	0	0	0	0	0	0	0	0	0	0	0	0	0	0	0	0	0	0	0	0	0	0
Bacteria|Proteobacteria|Alphaproteobacteria|Rhizobiales|Bradyrhizobiaceae	0	0	0	0	0	0	0	0	0	0	0	0	0	0	0	0	0	0	0	0.00321371	0	0	0	0	0	0	0	0	0	0	0	0	0	0	0	0	0	0	0	0	0	0	0	0	0	0	0	0	0
Bacteria|Proteobacteria|Alphaproteobacteria|Rhizobiales|Bradyrhizobiaceae|Bosea	0	0	0	0	0	0	0	0	0	0	0	0	0	0	0	0	0	0	0	0	0	0	0	0	0	0	0	0	0	0	0	0	0	0	0	0	0	0	0	0	0	0	0	0	0	0	0	0	0.00366077
Bacteria|Proteobacteria|Alphaproteobacteria|Rhizobiales|Bradyrhizobiaceae|Bradyrhizobium	0	0	0	0	0	0	0	0	0	0	0	0	0	0	0	0	0	0	0	0	0	0	0	0	0	0	0	0	0	0	0	0	0	0	0	0	0	0	0	0	0	0	0	0	0	0	0	0	0
Bacteria|Proteobacteria|Alphaproteobacteria|Rhizobiales|Bradyrhizobiaceae|Rhodopseudomonas	0	0	0	0	0	0	0	0	0	0	0	0	0	0	0	0	0	0	0	0.0128548	0	0	0	0	0	0	0	0	0	0	0	0	0	0	0	0	0	0	0	0	0	0	0	0	0	0	0	0	0
Bacteria|Proteobacteria|Alphaproteobacteria|Rhizobiales|Brucellaceae|Ochrobactrum	0	0	0	0	0	0	0	0	0	0	0	0	0.00107124	0	0	0.00214247	0	0	0.00160686	0	0	0	0	0	0	0	0	0.00964114	0	0	0	0.00214247	0	0	0	0	0	0	0	0	0	0	0	0	0	0	0	0	0
Bacteria|Proteobacteria|Alphaproteobacteria|Rhizobiales|Brucellaceae|Pseudochrobactrum	0	0	0	0	0	0	0	0	0	0	0	0	0	0.000535619	0.00107124	0.0149973	0.00160686	0	0.000535619	0	0	0	0	0	0	0	0	0	0	0.011248	0	0	0	0	0	0	0	0	0	0	0	0	0	0	0	0	0	0	0
Bacteria|Proteobacteria|Alphaproteobacteria|Rhizobiales|Hyphomicrobiaceae|Devosia	0	0	0	0	0	0	0	0	0	0	0	0	0	0	0	0	0	0	0	0.00160686	0	0	0	0	0	0	0	0	0.0176754	0	0	0	0	0	0	0	0	0	0	0	0	0	0	0	0	0	0	0.0103722	0
Bacteria|Proteobacteria|Alphaproteobacteria|Rhizobiales|Hyphomicrobiaceae|Hyphomicrobium	0	0	0	0	0	0	0	0	0	0	0	0	0	0	0	0	0	0	0	0.0235672	0	0	0	0	0	0	0	0	0	0	0	0	0	0	0	0	0	0	0	0	0	0	0	0	0	0	0	0	0
Bacteria|Proteobacteria|Alphaproteobacteria|Rhizobiales|Hyphomicrobiaceae|Pedomicrobium	0	0	0	0	0	0	0	0	0	0	0	0	0	0	0	0	0	0	0	0	0	0	0	0	0	0	0	0	0	0	0	0	0	0	0	0	0	0	0	0	0	0	0	0	0	0	0	0	0
Bacteria|Proteobacteria|Alphaproteobacteria|Rhizobiales|Methylobacteriaceae	0	0	0	0	0	0	0	0	0	0	0	0	0	0	0	0	0	0	0	0	0	0	0	0	0	0	0	0	0	0	0	0	0	0	0	0	0	0	0	0	0	0	0	0	0	0	0	0	0
Bacteria|Proteobacteria|Alphaproteobacteria|Rhizobiales|Methylobacteriaceae|Methylobacterium	0	0	0	0	0	0	0	0	0	0	0	0	0	0.00160686	0.00107124	0.00321371	0	0	0	0	0	0	0	0	0.00696304	0	0	0	0	0	0	0.00107124	0	0	0	0	0	0	0	0	0	0	0	0	0	0	0	0	0
Bacteria|Proteobacteria|Alphaproteobacteria|Rhizobiales|Methylobacteriaceae|Microvirga	0	0	0	0	0	0	0	0	0	0	0	0	0	0	0	0.0101768	0	0	0	0.000535619	0	0	0	0	0	0	0	0	0	0	0	0	0	0	0	0	0	0	0	0	0	0	0	0	0	0	0	0	0
Bacteria|Proteobacteria|Alphaproteobacteria|Rhizobiales|Methylobacteriaceae|Psychroglaciecola	0	0	0	0	0	0	0	0	0	0	0	0	0	0	0	0	0	0	0	0	0	0	0	0	0	0	0	0	0	0	0	0	0	0	0	0	0	0	0	0	0	0	0	0	0	0	0	0	0.00488103
Bacteria|Proteobacteria|Alphaproteobacteria|Rhizobiales|Phyllobacteriaceae	0	0	0	0	0	0	0	0	0	0	0	0	0	0	0	0	0	0	0	0	0	0	0	0	0	0	0	0	0	0	0	0	0	0	0	0	0	0	0	0	0	0	0	0	0	0	0	0	0
Bacteria|Proteobacteria|Alphaproteobacteria|Rhizobiales|Phyllobacteriaceae|Phyllobacterium	0	0	0	0	0	0	0	0	0	0	0	0	0	0	0	0	0	0	0	0	0	0	0	0	0	0	0	0	0	0	0	0	0	0	0	0	0	0	0	0	0	0	0	0	0	0	0	0	0
Bacteria|Proteobacteria|Alphaproteobacteria|Rhizobiales|Rhizobiaceae|Rhizobium	0	0	0	0	0	0	0	0	0	0	0	0	0	0	0.00428495	0	0	0	0.0310659	0.0192823	0	0	0	0.0508838	0	0	0	0	0	0.0144617	0	0.000535619	0	0	0	0	0	0	0	0	0	0	0	0	0	0	0.028676	0	0
Bacteria|Proteobacteria|Alphaproteobacteria|Rhizobiales|Rhizobiaceae|Shinella	0	0	0	0	0	0	0	0	0	0	0	0	0	0	0	0	0	0	0	0	0	0	0	0	0	0	0	0	0	0	0	0	0	0	0	0	0	0	0	0	0	0	0	0	0	0	0	0	0
Bacteria|Proteobacteria|Alphaproteobacteria|Rhizobiales|Rhodobiaceae|Tepidamorphus	0	0	0	0	0	0	0	0	0	0	0	0	0	0	0	0	0	0	0	0	0	0	0	0	0	0	0	0	0	0	0	0	0	0	0	0	0	0	0	0	0	0	0	0	0	0	0	0	0
Bacteria|Proteobacteria|Alphaproteobacteria|Rhizobiales|Xanthobacteraceae|Pseudolabrys	0	0	0	0	0	0	0	0	0	0	0	0	0	0	0	0	0	0	0	0.00107124	0	0	0	0	0	0	0	0	0	0	0	0	0	0	0	0	0	0	0	0	0	0	0	0	0	0	0	0	0
Bacteria|Proteobacteria|Alphaproteobacteria|Rhizobiales|Xanthobacteraceae|Variibacter	0	0	0	0	0	0	0	0	0	0	0	0	0	0	0	0	0	0	0	0.00214247	0	0	0	0	0	0	0	0	0	0	0	0	0	0	0	0	0	0	0	0	0	0	0	0	0	0	0	0	0
Bacteria|Proteobacteria|Alphaproteobacteria|Rhodobacterales|Rhodobacteraceae|Paracoccus	0	0	0	0	0	0	0	0	0	0	0	0	0	0	0	0	0	0	0.00267809	0	0	0	0	0	0	0	0	0	0	0.00749866	0	0	0	0	0	0	0	0	0	0	0	0	0	0	0	0	0	0	0
Bacteria|Proteobacteria|Alphaproteobacteria|Rhodobacterales|Rhodobacteraceae|Rubellimicrobium	0	0	0	0	0	0	0	0	0	0	0	0	0	0	0	0	0	0	0	0	0	0	0	0	0	0	0	0	0	0	0	0	0	0	0	0	0	0	0	0	0	0	0	0	0	0	0	0	0
Bacteria|Proteobacteria|Alphaproteobacteria|Rhodobacterales|Rhodobacteraceae|Tabrizicola	0	0	0	0	0	0	0	0	0	0	0	0	0	0	0	0	0	0	0	0	0	0	0	0	0	0	0	0	0	0	0	0	0	0	0	0	0	0	0	0	0	0	0	0	0	0	0	0	0
Bacteria|Proteobacteria|Alphaproteobacteria|Rhodospirillales	0	0	0	0	0	0	0	0	0	0	0	0	0	0	0	0	0	0	0	0.0128548	0	0	0	0	0	0	0	0	0	0	0	0	0	0	0	0	0	0	0	0	0	0	0	0	0	0	0	0	0
Bacteria|Proteobacteria|Alphaproteobacteria|Rhodospirillales|Acetobacteraceae|Roseomonas	0	0	0	0	0	0	0	0	0	0	0	0	0	0	0	0	0	0	0	0.00374933	0	0	0	0	0	0	0	0	0	0	0	0	0	0	0	0	0	0	0	0	0	0	0	0	0	0	0	0	0
Bacteria|Proteobacteria|Alphaproteobacteria|Rhodospirillales|Rhodospirillaceae	0	0	0	0	0	0	0	0	0	0	0	0	0	0	0	0.00107124	0.0107124	0.00107124	0	0	0	0	0	0	0	0	0.00267809	0	0	0	0	0.00107124	0	0	0	0	0.00267809	0.000535619	0.00374933	0	0	0	0	0	0	0	0	0	0
Bacteria|Proteobacteria|Alphaproteobacteria|Rhodospirillales|Rhodospirillaceae|Skermanella	0	0	0	0	0	0	0	0	0	0	0	0	0	0	0	0	0	0	0	0	0	0	0	0	0	0	0	0	0	0	0	0	0	0	0	0	0	0	0	0	0	0	0	0	0	0	0	0	0
Bacteria|Proteobacteria|Alphaproteobacteria|Rickettsiales	0	0	0	0	0	0	0	0	0	0	0	0	0	0	0	0	0	0	0	0	0	0	0	0	0	0	0	0	0	0	0	0	0	0	0	0	0	0	0	0	0	0	0	0	0	0	0	0	0
Bacteria|Proteobacteria|Alphaproteobacteria|Rickettsiales|Mitochondria	0	0	0	0	0	0	0	0	0	0	0	0	0.00642742	0.00321371	0.0192823	0.0128548	0.0235672	0.00589181	0.0149973	0.0123192	0	0.00482057	0.033744	0.00321371	0.0085699	0.0107124	0.0433851	0.0208891	0.0107124	0.0107124	0	0.00642742	0	0	0	0	0	0	0	0	0	0	0	0	0	0	0	0.0115924	0
Bacteria|Proteobacteria|Alphaproteobacteria|Sphingomonadales	0	0	0	0	0	0	0	0	0	0	0	0	0	0	0	0	0	0	0	0.0332084	0	0	0	0	0	0	0	0	0	0	0	0	0	0	0	0	0	0	0	0	0	0	0	0	0	0	0	0	0
Bacteria|Proteobacteria|Alphaproteobacteria|Sphingomonadales|Erythrobacteraceae|Altererythrobacter	0	0	0	0	0	0	0	0	0	0	0	0	0	0	0	0	0	0	0	0	0	0	0	0	0	0	0	0	0	0	0	0	0	0	0	0	0	0	0	0	0	0	0	0	0	0	0	0	0
Bacteria|Proteobacteria|Alphaproteobacteria|Sphingomonadales|Erythrobacteraceae|Porphyrobacter	0	0	0	0	0	0	0	0	0	0	0	0	0	0	0	0	0	0	0	0	0	0	0	0	0	0	0	0	0	0	0	0	0	0	0	0	0	0	0	0	0	0	0	0	0	0	0	0	0
Bacteria|Proteobacteria|Alphaproteobacteria|Sphingomonadales|Sphingomonadaceae|Novosphingobium	0	0	0	0	0	0	0	0	0	0	0	0	0	0	0	0	0	0	0	0.00428495	0	0	0	0	0	0	0	0	0	0	0	0	0	0	0	0	0	0	0	0	0	0	0	0	0	0	0	0	0
Bacteria|Proteobacteria|Alphaproteobacteria|Sphingomonadales|Sphingomonadaceae|Sphingobium	0	0	0	0	0	0	0	0	0	0	0	0	0	0	0	0	0	0	0	0	0	0	0	0	0	0	0	0	0	0	0	0	0	0	0	0	0	0	0	0	0	0	0	0	0	0	0	0	0
Bacteria|Proteobacteria|Alphaproteobacteria|Sphingomonadales|Sphingomonadaceae|Sphingomonas	0	0	0	0	0	0	0	0	0	0	0	0	0	0	0	0.000535619	0	0	0	0.00642742	0	0	0	0	0	0	0	0	0	0	0	0	0	0	0	0	0	0	0	0	0	0	0	0	0	0	0	0	0
Bacteria|Proteobacteria|Alphaproteobacteria|Sphingomonadales|Sphingomonadaceae|Sphingopyxis	0	0	0	0	0	0	0	0	0	0	0	0	0	0	0	0.00321371	0	0	0	0.00642742	0	0	0	0	0	0	0	0	0	0	0	0	0	0	0	0	0	0	0	0	0	0	0	0	0	0	0	0	0
Bacteria|Proteobacteria|Betaproteobacteria|Burkholderiales|Alcaligenaceae|Parasutterella	0	0	0	0	0	0	0	0	0	0	0	0	0	0	0.00428495	0	0	0	0	0	0	0	0	0.0235672	0	0.022496	0	0	0	0	0	0	0	0	0	0	0	0	0	0	0	0	0	0	0	0	0	0	0
Bacteria|Proteobacteria|Betaproteobacteria|Burkholderiales|Alcaligenaceae|Sutterella	0	0	0	0	0	0	0	0	0	0	0	0	0	0	0	0	0	0	0.0107124	0	0	0.00267809	0	0	0	0.000535619	0	0	0	0	0	0	0	0	0	0	0	0.000535619	0	0	0	0	0	0	0	0	0	0	0
Bacteria|Proteobacteria|Betaproteobacteria|Burkholderiales|Burkholderiaceae|Limnobacter	0	0	0	0	0	0	0	0	0	0	0	0	0	0	0	0	0	0	0	0	0	0	0	0	0	0	0	0	0	0	0	0	0	0	0	0	0	0	0	0	0	0	0	0	0	0	0	0	0
Bacteria|Proteobacteria|Betaproteobacteria|Burkholderiales|Burkholderiaceae|Ralstonia	0	0	0	0	0	0	0	0	0	0	0	0	0	0	0	0	0	0	0	0	0	0	0	0	0	0	0	0	0	0	0	0.00107124	0	0	0	0	0	0	0	0	0	0	0	0	0	0	0.00183038	0	0
Bacteria|Proteobacteria|Betaproteobacteria|Burkholderiales|Comamonadaceae|Pelomonas	0	0	0	0	0	0	0	0	0	0	0	0	0	0	0.00107124	0	0	0	0	0.00214247	0	0	0	0.0283878	0.00696304	0	0	0.000535619	0.00267809	0	0	0	0	0	0	0	0	0	0	0	0	0	0	0	0	0	0	0	0
Bacteria|Proteobacteria|Betaproteobacteria|Burkholderiales|Comamonadaceae|Tepidimonas	0	0	0	0	0	0	0	0	0	0	0	0	0	0	0	0	0	0	0	0	0	0	0	0	0	0	0	0	0	0	0	0	0	0	0	0	0	0	0	0	0	0	0	0	0	0	0	0.00854179	0
Bacteria|Proteobacteria|Betaproteobacteria|Burkholderiales|Oxalobacteraceae|Duganella	0	0	0	0	0	0	0	0	0	0	0	0	0	0	0	0	0	0	0	0	0	0	0	0	0	0	0	0	0	0	0	0	0	0	0	0	0	0	0	0	0	0	0	0	0	0	0	0	0
Bacteria|Proteobacteria|Betaproteobacteria|Burkholderiales|Oxalobacteraceae|Massilia	0	0	0	0	0	0	0	0	0	0	0	0	0	0	0	0	0	0	0.00107124	0.00374933	0	0	0	0	0	0	0.00428495	0	0	0	0	0	0	0	0	0	0	0	0	0	0	0	0	0	0	0	0.00488103	0	0
Bacteria|Proteobacteria|Betaproteobacteria|Hydrogenophilales|Hydrogenophilaceae|Tepidiphilus	0	0	0	0	0	0	0	0	0	0	0	0	0	0	0	0	0	0	0	0	0	0	0	0	0	0	0	0	0	0	0	0	0	0	0	0	0	0	0	0	0	0	0	0	0	0	0	0	0
Bacteria|Proteobacteria|Betaproteobacteria|Neisseriales|Neisseriaceae	0	0	0	0	0	0	0	0	0	0	0	0	0	0	0.00374933	0	0	0	0	0	0	0	0	0	0	0	0	0	0	0	0	0	0.000535619	0	0	0	0	0	0	0	0	0	0	0	0	0	0	0	0
Bacteria|Proteobacteria|Betaproteobacteria|Neisseriales|Neisseriaceae|Kingella	0	0	0	0	0	0	0	0	0	0	0	0	0	0	0	0	0	0	0	0	0	0	0	0	0	0	0	0	0	0	0	0	0	0	0	0	0	0	0	0	0	0	0	0	0	0	0	0	0
Bacteria|Proteobacteria|Betaproteobacteria|Nitrosomonadales|Nitrosomonadaceae	0	0	0	0	0	0	0	0	0	0	0	0	0	0	0	0	0	0	0	0.033744	0	0	0	0	0	0	0	0	0	0	0	0	0	0	0	0	0	0	0	0	0	0	0	0	0	0	0	0	0
Bacteria|Proteobacteria|Betaproteobacteria|Rhodocyclales|Rhodocyclaceae	0	0	0	0	0	0	0	0	0	0	0	0	0	0	0	0	0	0	0	0	0	0	0	0	0	0	0	0	0	0	0	0	0	0	0	0	0	0	0	0	0	0	0	0	0	0	0	0	0
Bacteria|Proteobacteria|Betaproteobacteria|Rhodocyclales|Rhodocyclaceae|Azovibrio	0	0	0	0	0	0	0	0	0	0	0	0	0	0	0	0	0	0	0	0	0	0	0	0	0	0	0	0	0	0	0	0	0	0	0	0	0	0	0	0	0	0	0	0	0	0	0	0	0
Bacteria|Proteobacteria|Betaproteobacteria|Rhodocyclales|Rhodocyclaceae|Thauera	0	0	0	0	0	0	0	0	0	0	0	0	0	0	0	0	0	0	0	0	0	0	0	0	0	0	0	0	0	0	0	0	0	0	0	0	0	0	0	0	0	0	0	0	0	0	0	0	0
Bacteria|Proteobacteria|Deltaproteobacteria	0	0	0	0	0	0	0	0	0	0	0	0	0	0	0	0	0	0	0	0	0	0	0	0	0	0	0	0	0	0	0	0	0	0	0	0	0	0	0	0	0	0	0	0	0	0	0	0	0
Bacteria|Proteobacteria|Deltaproteobacteria|Bdellovibrionales|Bdellovibrionaceae|Bdellovibrio	0	0	0	0	0	0	0	0	0	0	0	0	0	0	0	0	0	0	0	0	0	0	0	0	0	0	0	0	0	0	0	0	0	0	0	0	0	0	0	0	0	0	0	0	0	0	0	0	0
Bacteria|Proteobacteria|Deltaproteobacteria|Desulfovibrionales|Desulfohalobiaceae|Desulfovermiculus	0	0	0	0	0	0	0	0	0	0	0	0	0	0	0	0	0	0	0	0	0	0	0	0	0	0	0	0	0	0	0	0	0	0	0	0	0	0	0	0	0	0	0	0	0	0	0	0	0
Bacteria|Proteobacteria|Deltaproteobacteria|Desulfovibrionales|Desulfovibrionaceae|Bilophila	0	0	0	0	0	0	0	0	0	0	0	0	0	0	0	0	0	0	0	0	0	0	0	0	0	0	0	0	0	0	0	0	0	0	0	0	0	0	0	0	0	0	0	0	0	0	0	0	0
Bacteria|Proteobacteria|Deltaproteobacteria|Desulfovibrionales|Desulfovibrionaceae|Desulfovibrio	0	0	0	0	0	0	0	0	0	0	0	0	0.000535619	0	0	0	0	0	0	0	0	0	0	0	0	0	0	0	0	0	0	0	0	0	0	0	0.000535619	0.00321371	0.00107124	0	0	0	0	0	0	0	0	0	0
Bacteria|Proteobacteria|Deltaproteobacteria|Myxococcales	0	0	0	0	0	0	0	0	0	0	0	0	0	0	0	0	0	0	0	0.0241028	0	0	0	0	0	0	0	0	0	0	0	0	0	0	0	0	0	0	0	0	0	0	0	0	0	0	0	0	0
Bacteria|Proteobacteria|Deltaproteobacteria|Myxococcales|Myxococcaceae	0	0	0	0	0	0	0	0	0	0	0	0	0	0	0	0	0	0	0	0	0	0	0	0	0	0	0	0	0	0	0	0	0	0	0	0	0	0	0	0	0	0	0	0	0	0	0	0	0
Bacteria|Proteobacteria|Deltaproteobacteria|Myxococcales|Phaselicystidaceae|Phaselicystis	0	0	0	0	0	0	0	0	0	0	0	0	0	0	0	0	0	0	0	0	0	0	0	0	0	0	0	0	0	0	0	0	0	0	0	0	0	0	0	0	0	0	0	0	0	0	0	0	0
Bacteria|Proteobacteria|Deltaproteobacteria|Myxococcales|Polyangiaceae|Sorangium	0	0	0	0	0	0	0	0	0	0	0	0	0	0	0	0	0	0	0	0.00374933	0	0	0	0	0	0	0	0	0	0	0	0	0	0	0	0	0	0	0	0	0	0	0	0	0	0	0	0	0
Bacteria|Proteobacteria|Epsilonproteobacteria|Campylobacterales|Campylobacteraceae|Campylobacter	0	0	0	0	0	0	0	0	0	0	0	0	0	0	0.011248	0	0	0	0	0	0	0	0	0	0	0	0	0	0	0	0	0	0	0	0	0	0	0	0	0	0	0	0	0	0	0	0	0	0
Bacteria|Proteobacteria|Epsilonproteobacteria|Campylobacterales|Helicobacteraceae|Helicobacter	0	0	0	0	0	0	0	0	0	0	0	0	0	0.000535619	0	0	0	0	0	0	0	0	0	0	0.00267809	0	0	0	0	0	0	0	0	0	0	0	0	0	0	0	0	0	0	0	0	0	0	0	0
Bacteria|Proteobacteria|Gammaproteobacteria|Aeromonadales|Aeromonadaceae|Aeromonas	0	0	0	0	0	0	0	0	0	0	0	0	0	0	0	0	0	0	0	0	0	0	0	0	0	0	0	0	0	0	0	0	0	0	0	0	0	0	0	0	0	0	0	0	0	0	0	0	0
Bacteria|Proteobacteria|Gammaproteobacteria|Aeromonadales|Aeromonadaceae|Tolumonas	0	0	0	0	0	0	0	0	0	0	0	0	0	0	0	0	0	0	0	0	0	0	0	0	0	0	0	0	0	0	0	0	0	0	0	0	0	0	0	0	0	0	0	0	0	0	0	0	0
Bacteria|Proteobacteria|Gammaproteobacteria|Aeromonadales|Succinivibrionaceae|Anaerobiospirillum	0	0	0	0	0	0	0	0	0	0	0	0	0.00374933	0.00589181	0	0	0	0.00214247	0.00749866	0	0	0	0.0128548	0.0278522	0	0	0	0.00803428	0	0	0	0.00535619	0	0	0	0	0	0	0	0	0	0	0	0	0	0	0	0	0
Bacteria|Proteobacteria|Gammaproteobacteria|Alteromonadales|Alteromonadaceae|Alishewanella	0	0	0	0	0	0	0	0	0	0	0	0	0	0	0	0	0	0	0	0	0	0	0	0	0	0	0	0	0	0	0	0	0	0	0	0	0	0	0	0	0	0	0	0	0	0	0	0	0
Bacteria|Proteobacteria|Gammaproteobacteria|Alteromonadales|Shewanellaceae|Shewanella	0	0	0	0	0	0	0	0	0	0	0	0	0	0	0	0	0	0	0	0	0	0	0	0	0	0	0	0	0.00107124	0	0	0.000535619	0	0	0	0	0	0	0	0	0	0	0	0	0	0	0	0	0
Bacteria|Proteobacteria|Gammaproteobacteria|Cellvibrionales|Porticoccaceae	0	0	0	0	0	0	0	0	0	0	0	0	0	0	0	0	0	0	0	0	0	0	0	0	0	0	0	0	0	0	0	0	0	0	0	0	0	0	0	0	0	0	0	0	0	0	0	0	0
Bacteria|Proteobacteria|Gammaproteobacteria|Chromatiales|Chromatiaceae|Rheinheimera	0	0	0	0	0	0	0	0	0	0	0	0	0	0	0	0	0	0	0	0	0	0	0	0	0	0	0	0	0	0	0	0	0	0	0	0	0	0	0	0	0	0	0	0	0	0	0	0	0
Bacteria|Proteobacteria|Gammaproteobacteria|Enterobacteriales|Enterobacteriaceae|Citrobacter	0	0	0	0	0	0	0	0	0	0	0	0	0	0	0	0	0	0	0	0	0	0	0	0	0	0	0	0	0	0	0	0	0	0	0	0	0	0	0	0	0	0	0	0	0	0	0.0207444	0	0.0115924
Bacteria|Proteobacteria|Gammaproteobacteria|Enterobacteriales|Enterobacteriaceae|Escherichia/Shigella	0	0	0	0	0	0	0	0	0	0	0	0	0.033744	0.0123192	0.0299946	0.0171398	0.0257097	0.0160686	0.0417783	0.0160686	0	0.00374933	0.00535619	0.070166	0.107659	0.0257097	0.0208891	0.00535619	0.0444563	0.0176754	0	0.0305303	0	0.000535619	0	0	0	0	0	0	0	0	0	0	0	0	0	0	0
Bacteria|Proteobacteria|Gammaproteobacteria|Legionellales|Legionellaceae|Legionella	0	0	0	0	0	0	0	0	0	0	0	0	0	0	0	0	0	0	0	0	0	0	0	0	0	0	0	0	0	0	0	0	0	0	0	0	0	0	0	0	0	0	0	0	0	0	0	0	0.00122026
Bacteria|Proteobacteria|Gammaproteobacteria|Oceanospirillales|Halomonadaceae|Halomonas	0	0	0	0	0	0	0	0	0	0	0	0	0	0	0	0	0	0	0	0	0	0	0	0	0	0	0	0	0	0	0	0	0	0	0	0	0	0	0	0	0	0	0	0	0	0	0	0	0
Bacteria|Proteobacteria|Gammaproteobacteria|Pasteurellales|Pasteurellaceae|Bisgaardia	0	0	0	0	0	0	0	0	0	0	0	0	0	0	0	0	0	0	0	0	0	0	0	0	0.00107124	0	0	0	0	0	0	0	0	0	0	0	0	0	0	0	0	0	0	0	0	0	0	0	0
Bacteria|Proteobacteria|Gammaproteobacteria|Pasteurellales|Pasteurellaceae|Frederiksenia	0	0	0	0	0	0	0	0	0	0	0	0	0	0	0	0	0	0	0	0	0	0	0	0	0	0	0	0	0	0	0	0	0	0	0	0	0	0	0	0	0	0	0	0	0	0	0	0	0
Bacteria|Proteobacteria|Gammaproteobacteria|Pasteurellales|Pasteurellaceae|Haemophilus	0	0	0	0	0	0	0	0	0	0	0	0	0	0	0	0	0	0	0	0	0	0	0	0	0.040707	0	0	0.0246385	0	0	0	0	0.000535619	0	0	0	0	0	0	0	0	0	0	0	0	0	0	0	0
Bacteria|Proteobacteria|Gammaproteobacteria|Pseudomonadales|Moraxellaceae|Acinetobacter	0	0	0	0	0	0	0	0	0	0	0	0	0	0	0	0.00910552	0	0.000535619	0	0	0	0	0	0.0219604	0	0	0	0	0	0	0.000535619	0	0	0	0	0	0.000535619	0	0	0	0	0	0	0	0	0	0.289201	0.254423	0.0457596
Bacteria|Proteobacteria|Gammaproteobacteria|Pseudomonadales|Moraxellaceae|Psychrobacter	0	0	0	0	0	0	0	0	0	0	0	0	0	0	0	0	0	0	0	0	0	0	0	0	0	0	0	0	0	0	0	0	0	0	0	0	0	0	0	0	0	0	0	0	0	0	0	0	0
Bacteria|Proteobacteria|Gammaproteobacteria|Pseudomonadales|Pseudomonadaceae|Pseudomonas	0	0	0	0	0	0	0	0	0	0	0	0	0	0	0.00374933	0.011248	0	0	0	0	0	0.00321371	0.00160686	0.0128548	0	0	0.0149973	0	0	0	0	0	0	0	0	0	0	0	0	0	0	0	0	0	0	0	0	0.00183038	0
Bacteria|Proteobacteria|Gammaproteobacteria|Vibrionales|Vibrionaceae|Photobacterium	0	0	0	0	0	0	0	0	0	0	0	0	0	0	0.00803428	0	0	0	0	0	0	0	0	0	0	0	0	0	0	0	0	0	0	0	0	0	0	0	0	0	0	0	0	0	0	0	0	0	0
Bacteria|Proteobacteria|Gammaproteobacteria|Xanthomonadales	0	0	0	0	0	0	0	0	0	0	0	0	0	0	0	0	0	0.00160686	0	0.0514194	0	0	0	0	0	0	0	0	0	0	0	0	0	0	0	0	0	0	0	0	0	0	0	0	0	0	0	0	0
Bacteria|Proteobacteria|Gammaproteobacteria|Xanthomonadales|Xanthomonadaceae|Luteimonas	0	0	0	0	0	0	0	0	0	0	0	0	0	0	0	0	0	0	0	0	0	0.00160686	0	0	0	0	0	0	0	0	0	0	0	0	0	0	0	0	0	0	0	0	0	0	0	0	0	0	0
Bacteria|Proteobacteria|Gammaproteobacteria|Xanthomonadales|Xanthomonadaceae|Pseudoxanthomonas	0	0	0	0	0	0	0	0	0	0	0	0	0	0	0	0.00321371	0	0	0	0	0	0	0	0	0	0	0	0	0	0	0	0	0	0	0	0	0	0	0	0	0	0	0	0	0	0	0	0	0
Bacteria|Proteobacteria|Gammaproteobacteria|Xanthomonadales|Xanthomonadaceae|Silanimonas	0	0	0	0	0	0	0	0	0	0	0	0	0	0	0	0	0	0	0	0	0	0	0	0	0	0	0	0	0	0	0	0	0	0	0	0	0	0	0	0	0	0	0	0	0	0	0	0	0
Bacteria|Proteobacteria|Gammaproteobacteria|Xanthomonadales|Xanthomonadaceae|Stenotrophomonas	0	0	0	0	0	0	0	0	0	0	0	0	0	0	0	0	0	0	0.000535619	0	0	0	0	0	0.00589181	0	0	0.00589181	0	0.00749866	0	0	0	0	0	0	0	0	0	0	0	0	0	0	0	0	0	0	0
Bacteria|Proteobacteria|Gammaproteobacteria|Xanthomonadales|Xanthomonadaceae|Thermomonas	0	0	0	0	0	0	0	0	0	0	0	0	0	0	0	0	0	0	0	0	0	0	0	0	0	0	0	0	0	0	0	0	0	0	0	0	0	0	0	0	0	0	0	0	0	0	0	0	0
Bacteria|Proteobacteria|Gammaproteobacteria|Xanthomonadales|Xanthomonadaceae|Xanthomonas	0	0	0	0	0	0	0	0	0	0	0	0	0	0	0	0.00803428	0	0	0.00107124	0.00160686	0	0.00535619	0	0	0	0	0	0	0	0	0	0	0	0	0	0	0	0	0	0	0	0	0	0	0	0	0	0	0
Bacteria|Spirochaetae|Spirochaetes|Spirochaetales|Spirochaetaceae	0	0	0	0	0	0	0	0	0	0	0	0	0	0	0	0	0	0	0	0	0	0	0	0	0	0	0	0	0	0	0	0	0	0	0	0	0	0	0	0	0	0	0	0	0	0	0	0	0
Bacteria|Tenericutes|Mollicutes	0.022496	0.00535619	0.0187467	0.0326727	0.0107124	0.0123192	0.018211	0.0085699	0.0176754	0.0364221	0.0149973	0.00803428	0	0	0	0.00964114	0.00160686	0.0144617	0.00160686	0	0.0107124	0.00589181	0	0	0	0	0.00107124	0	0	0	0.00910552	0.00374933	0.00803428	0.0192823	0.0160686	0.0117836	0	0	0.0085699	0.0149973	0.040707	0.0085699	0.0107124	0.0219604	0.00964114	0.011248	0	0	0
Bacteria|Tenericutes|Mollicutes|Anaeroplasmatales|Anaeroplasmataceae|Anaeroplasma	0.00535619	0.0589181	0.00910552	0.00642742	0.00160686	0.00803428	0.0085699	0.00642742	0.00160686	0.00964114	0.0117836	0.0101768	0	0.0101768	0	0.00321371	0.00107124	0	0.00910552	0	0.0101768	0.00107124	0	0	0	0	0	0	0	0	0.0289234	0	0.00374933	0	0	0.00107124	0	0	0	0.00535619	0.00428495	0	0.00214247	0.00214247	0.0128548	0.00910552	0	0	0
Bacteria|Verrucomicrobia	0	0	0	0	0	0	0	0	0	0	0	0	0	0	0	0	0	0	0	0	0	0	0	0	0	0	0	0	0	0	0	0	0	0	0	0	0	0	0	0	0	0	0	0	0	0	0	0	0.00122026
Bacteria|Verrucomicrobia|Spartobacteria|Chthoniobacterales	0	0	0	0	0	0	0	0	0	0	0	0	0	0	0	0	0	0	0	0	0	0	0	0	0	0	0	0	0	0	0	0	0	0	0	0	0	0	0	0	0	0	0	0	0	0	0	0.00244051	0
Bacteria|Verrucomicrobia|Verrucomicrobiae|Verrucomicrobiales	0	0	0	0	0	0	0	0	0	0	0	0	0	0	0	0	0	0	0	0	0	0	0	0	0	0	0	0	0	0	0	0	0	0	0	0	0	0	0	0	0	0	0	0	0	0	0	0	0
Bacteria|Verrucomicrobia|Verrucomicrobiae|Verrucomicrobiales|Verrucomicrobiaceae	0	0	0	0	0	0	0	0	0	0	0	0	0	0	0	0	0	0	0	0	0	0	0	0	0	0	0	0	0	0	0	0	0	0	0	0	0	0	0	0	0	0	0	0	0	0	0	0	0
Bacteria|Verrucomicrobia|Verrucomicrobiae|Verrucomicrobiales|Verrucomicrobiaceae|Akkermansia	0.000535619	0	0	0	0	0	0	0	0	0	0	0	0	0	0	0.0123192	0.0198179	0.0166042	0.00642742	0	0	0.000535619	0.0133905	0.00214247	0.0117836	0	0	0	0	0	0	0.0358864	0	0	0	0	0.126942	0.225495	0.044992	0	0	0	0	0	0	0	0	0	0
[truncated: 46 more columns]
