# Supplementary material for: Effect of Antibiotics on Gut and Vaginal Microbiomes Associated with Cervical Cancer Development in Mice
Source: Oxford University Press journal article supplement (doi:10.1158/1940-6207.capr-20-0103), 2020-09-11
Supplement: 19406207capr200103-sup-238593_2_supp_6478130_qwlylh.xlsx [file 19406207capr200103-sup-238593_2_supp_6478130_qwlylh.xlsx]

## Sheet: Table S2
Table S2. OTUs and their normalized abundances in the validation cohort
The sample ID includes 4 groups, X1.X2.X3.X4, such as M28.BL.F.NO.ABX, with the following meaning
X1 is the mouse ID
X2, BL, is an in-house label that should be ignored
X3, F or V, where F is a gut sample and V is a vaginal sample
X4, NO.ABX or ABX, where NO.ABX is a NoAB treated mouse and ABX is an AB treated mouse
The metadata of the samples are also provided in the Table S3
Taxa/Samples	M17.BL.F.NO.ABX	M18.BL.F.NO.ABX	M19.BL.F.NO.ABX	M23.BL.F.NO.ABX	M24.BL.F.NO.ABX	M25.BL.F.NO.ABX	M26.BL.F.NO.ABX	M27.BL.F.NO.ABX	M28.BL.F.NO.ABX	M29.BL.F.NO.ABX	M30.BL.F.NO.ABX	M1.BL.F.ABX	M10.BL.F.ABX	M11.BL.F.ABX	M12.BL.F.ABX	M13.BL.F.ABX	M14.BL.F.ABX	M15.BL.F.ABX	M2.BL.F.ABX	M3.BL.F.ABX	M4.BL.F.ABX	M5.BL.F.ABX	M7.BL.F.ABX	M8.BL.F.ABX	M9.BL.F.ABX	M16.BL.V.NO.ABX	M17.BL.V.NO.ABX	M18.BL.V.NO.ABX	M19.BL.V.NO.ABX	M20.BL.V.NO.ABX	M21.BL.V.NO.ABX	M22.BL.V.NO.ABX	M23.BL.V.NO.ABX	M24.BL.V.NO.ABX	M25.BL.V.NO.ABX	M26.BL.V.NO.ABX	M27.BL.V.NO.ABX	M28.BL.V.NO.ABX	M29.BL.V.NO.ABX	M30.BL.V.NO.ABX	M1.BL.V.ABX	M10.BL.V.ABX	M11.BL.V.ABX	M12.BL.V.ABX	M13.BL.V.ABX	M14.BL.V.ABX	M15.BL.V.ABX	M2.BL.V.ABX	M3.BL.V.ABX
Archaea|Euryarchaeota|Halobacteria|Halobacteriales|Halobacteriaceae|Halarchaeum	0	0	0	0	0.000773395	0	0	0	0	0	0	0	0	0	0	0	0	0	0	0	0	0	0	0	0	0	0	0	0	0	0	0	0	0	0	0	0	0	0	0	0	0	0	0	0	0	0	0	0
Archaea|Euryarchaeota|Methanobacteria|Methanobacteriales|Methanobacteriaceae|Methanobrevibacter	0	0	0	0	0	0	0	0	0	0	0	0	0	0	0	0	0	0	0.000773395	0	0	0	0	0	0	0.000773395	0	0	0	0	0	0	0	0	0	0	0	0	0	0	0	0	0	0	0	0	0	0	0
Archaea|Thaumarchaeota|Thaumarchaeota|Thaumarchaeota|Thaumarchaeota|Thaumarchaeota	0	0	0	0	0	0	0	0	0	0	0	0	0	0	0	0	0	0	0	0	0	0	0.000773395	0	0	0	0	0	0	0	0	0	0	0	0	0	0	0	0	0	0	0	0	0	0	0	0	0	0
Bacteria|Acidobacteria|Acidobacteria|Acidobacteria|Acidobacteria|Acidobacteria	0	0	0	0	0	0	0	0	0	0	0	0	0	0	0	0	0	0	0	0	0	0	0.00386698	0	0	0	0	0	0	0	0	0	0	0	0	0	0	0	0	0	0	0	0	0	0	0	0	0	0
Bacteria|Acidobacteria|Blastocatellia|Blastocatellales|Blastocatellales|Blastocatella	0	0	0	0	0	0	0	0	0	0	0	0	0	0	0	0	0	0	0	0	0	0	0.033256	0	0	0	0	0	0	0	0	0	0	0	0	0	0	0	0	0	0	0	0	0	0	0	0	0	0
Bacteria|Acidobacteria|Blastocatellia|Blastocatellales|Blastocatellales|Blastocatellales	0	0	0	0.00154679	0	0	0	0	0	0	0	0	0	0	0	0	0	0	0	0	0	0	0	0	0	0	0	0	0	0	0	0	0	0	0	0	0	0	0	0	0	0	0	0	0	0	0	0	0
Bacteria|Acidobacteria|Blastocatellia|Blastocatellales|Blastocatellales|Stenotrophobacter	0	0	0	0	0	0	0	0	0	0	0	0	0	0	0	0	0	0	0	0	0	0	0.00232019	0	0	0	0	0	0	0	0	0	0	0	0	0	0	0	0	0	0	0	0	0	0	0	0	0	0
Bacteria|Actinobacteria|Actinobacteria|Actinomycetales|Actinomycetaceae|Actinomyces	0	0	0	0.000773395	0	0	0.000773395	0.000773395	0	0.000773395	0.00154679	0	0	0	0	0	0	0	0	0	0	0	0	0	0	0	0	0	0	0	0	0.00232019	0	0.00232019	0	0	0	0	0	0	0	0	0	0	0	0	0	0	0
Bacteria|Actinobacteria|Actinobacteria|Actinomycetales|Actinomycetaceae|Actinomycetaceae	0	0	0	0	0	0	0	0	0	0	0	0	0	0	0	0	0	0	0	0	0	0	0	0	0	0	0	0	0	0	0	0	0	0	0	0	0	0	0	0	0	0	0	0	0	0.00154679	0	0	0
Bacteria|Actinobacteria|Actinobacteria|Bifidobacteriales|Bifidobacteriaceae|Bifidobacterium	0.00386698	0.000773395	0.00154679	0.00386698	0.00309358	0.000773395	0	0.00773395	0.00232019	0.000773395	0	0.00541377	0.000773395	0.00928074	0	0.0139211	0	0.00464037	0.0208817	0	0	0	0.000773395	0	0.000773395	0.00154679	0.000773395	0.0108275	0.000773395	0	0	0	0.00541377	0	0	0	0.00232019	0	0.00464037	0	0.000773395	0	0.00464037	0	0	0	0	0.00850735	0
Bacteria|Actinobacteria|Actinobacteria|Corynebacteriales|Corynebacteriaceae|Corynebacteriaceae	0	0	0	0.00773395	0.00232019	0	0	0	0.00309358	0	0.000773395	0	0	0	0	0	0	0	0.00696056	0	0	0	0	0	0	0.00232019	0	0.00154679	0	0	0	0	0	0	0	0	0	0.00154679	0.00386698	0	0	0.00232019	0	0.00154679	0.00618716	0	0	0.00309358	0
Bacteria|Actinobacteria|Actinobacteria|Corynebacteriales|Corynebacteriaceae|Corynebacterium	0	0	0	0	0	0	0	0	0	0	0.00386698	0	0	0	0	0	0	0	0	0	0	0	0	0	0	0	0	0	0	0	0	0	0	0	0	0	0	0	0	0	0	0	0	0	0	0	0	0	0
Bacteria|Actinobacteria|Actinobacteria|Corynebacteriales|Corynebacteriaceae|Lawsonella	0	0	0	0	0	0	0	0	0	0	0	0.00154679	0	0	0	0	0	0	0.0100541	0	0	0	0	0	0	0	0	0	0	0	0	0.0185615	0	0.00309358	0	0	0	0	0	0.000773395	0	0	0	0.00541377	0	0	0	0	0
Bacteria|Actinobacteria|Actinobacteria|Corynebacteriales|Dietziaceae|Dietzia	0	0	0	0	0	0	0	0	0	0	0	0	0	0	0	0	0	0	0	0	0	0	0	0	0	0	0	0	0	0	0	0	0	0	0	0	0	0	0	0	0	0	0	0	0	0	0	0	0
Bacteria|Actinobacteria|Actinobacteria|Corynebacteriales|Nocardiaceae|Rhodococcus	0	0	0	0	0.00154679	0	0	0	0	0	0	0	0	0	0	0	0	0	0	0	0	0	0	0	0	0	0	0	0	0	0	0	0	0	0	0	0	0	0	0	0	0	0	0	0	0	0	0	0
Bacteria|Actinobacteria|Actinobacteria|Frankiales|Cryptosporangiaceae|Fodinicola	0	0	0	0	0	0	0	0	0	0	0	0	0	0	0	0	0	0	0	0	0	0	0.00154679	0	0	0	0	0	0	0	0	0	0	0	0	0	0	0	0	0	0	0	0	0	0	0	0	0	0
Bacteria|Actinobacteria|Actinobacteria|Frankiales|Geodermatophilaceae|Geodermatophilus	0	0	0	0	0	0	0	0	0	0	0	0	0	0	0	0	0	0	0	0	0	0	0	0	0	0	0	0	0	0	0	0	0	0	0	0	0	0	0	0	0	0	0	0	0	0	0	0	0
Bacteria|Actinobacteria|Actinobacteria|Frankiales|Nakamurellaceae|Nakamurella	0	0	0	0	0	0	0	0	0	0	0	0	0	0	0	0	0	0	0	0	0	0	0.00386698	0	0	0	0	0	0	0	0	0	0	0	0	0	0	0	0	0	0	0	0	0	0	0	0	0	0
Bacteria|Actinobacteria|Actinobacteria|Kineosporiales|Kineosporiaceae|Kineococcus	0	0	0	0	0.00386698	0	0	0	0	0	0.000773395	0	0	0	0	0	0	0	0	0	0	0	0.0100541	0	0	0	0	0	0	0	0	0	0	0	0	0	0	0	0	0.00154679	0	0	0	0	0	0	0	0	0
Bacteria|Actinobacteria|Actinobacteria|Kineosporiales|Kineosporiaceae|Kineosporia	0	0	0	0	0.000773395	0	0	0	0.000773395	0	0	0	0	0	0	0	0	0	0	0	0	0	0.000773395	0	0	0	0	0	0	0	0	0	0	0	0	0	0	0	0.00309358	0	0	0	0	0	0	0	0	0	0
Bacteria|Actinobacteria|Actinobacteria|Micrococcales|Bogoriellaceae|Georgenia	0	0	0	0	0	0	0	0	0	0	0	0	0	0	0	0	0	0	0	0	0	0	0	0	0	0	0	0	0	0	0	0	0	0	0	0	0	0	0	0	0	0	0	0	0	0	0	0	0
Bacteria|Actinobacteria|Actinobacteria|Micrococcales|Brevibacteriaceae|Brevibacterium	0.00154679	0	0	0	0	0	0	0	0	0	0	0	0	0	0	0	0	0	0	0	0	0	0	0	0	0	0	0	0	0	0	0	0	0	0	0	0	0	0	0	0	0	0	0	0	0	0	0	0
Bacteria|Actinobacteria|Actinobacteria|Micrococcales|Intrasporangiaceae|Phycicoccus	0	0	0	0.00309358	0	0	0	0	0	0	0	0	0	0	0	0	0	0	0	0	0	0	0.0193349	0	0	0	0	0	0	0	0	0.000773395	0	0	0	0	0	0	0	0	0	0	0	0	0	0.000773395	0	0	0
Bacteria|Actinobacteria|Actinobacteria|Micrococcales|Microbacteriaceae|Curtobacterium	0.00232019	0	0.000773395	0	0	0	0	0	0.00154679	0	0	0	0	0	0	0	0	0	0.00232019	0	0	0	0.00541377	0	0	0	0	0	0	0	0	0	0	0	0	0	0	0.00232019	0.000773395	0.00154679	0	0	0.00154679	0	0	0.00309358	0	0	0
Bacteria|Actinobacteria|Actinobacteria|Micrococcales|Micrococcaceae|Arthrobacter	0	0	0	0	0	0	0	0	0	0	0.00232019	0	0	0	0	0	0	0	0	0	0	0	0	0	0	0	0	0	0	0	0	0.00386698	0	0	0	0	0	0.000773395	0.0549111	0	0	0	0	0	0	0	0	0	0
Bacteria|Actinobacteria|Actinobacteria|Micrococcales|Micrococcaceae|Kocuria	0	0	0	0	0	0	0	0	0	0	0	0	0	0	0	0	0	0	0	0	0	0	0	0	0	0	0	0	0	0	0	0	0	0.00154679	0	0	0	0	0	0	0	0	0	0	0	0	0	0	0
Bacteria|Actinobacteria|Actinobacteria|Micrococcales|Micrococcaceae|Rothia	0	0	0	0	0	0	0	0	0	0	0	0	0	0	0	0	0	0	0	0	0.00309358	0	0	0	0	0	0	0	0	0.000773395	0	0.00386698	0	0.00541377	0	0	0	0	0	0	0	0	0	0	0	0.000773395	0	0.00154679	0
Bacteria|Actinobacteria|Actinobacteria|Micrococcales|Promicromonosporaceae|Cellulosimicrobium	0	0	0	0	0.000773395	0	0	0	0	0	0	0	0	0	0	0	0	0	0	0	0	0	0	0	0	0	0	0	0	0	0	0	0	0	0	0	0	0	0	0	0	0	0.00309358	0	0	0	0	0	0
Bacteria|Actinobacteria|Actinobacteria|Micrococcales|Promicromonosporaceae|Isoptericola	0	0	0	0	0	0	0	0	0	0	0	0	0	0	0	0	0	0	0	0	0.000773395	0	0	0	0	0	0	0	0	0	0	0	0	0	0	0	0	0	0	0	0	0	0	0	0	0	0	0	0
Bacteria|Actinobacteria|Actinobacteria|Micromonosporales|Micromonosporaceae|Actinoplanes	0	0	0	0	0	0	0	0	0	0	0	0.00309358	0	0	0	0	0	0	0	0	0	0	0	0	0	0	0	0	0	0	0	0	0	0	0	0	0	0	0	0	0	0	0	0	0	0	0	0	0
Bacteria|Actinobacteria|Actinobacteria|Micromonosporales|Micromonosporaceae|Micromonospora	0	0	0	0	0	0	0	0	0	0	0	0	0	0	0	0	0	0	0	0	0	0	0	0	0	0	0	0	0	0	0	0	0	0	0	0	0	0	0	0	0	0	0	0	0	0	0	0	0
Bacteria|Actinobacteria|Actinobacteria|Propionibacteriales|Nocardioidaceae|Aeromicrobium	0	0	0	0	0	0	0	0	0	0	0	0	0	0	0	0	0	0	0	0	0	0	0.000773395	0	0	0	0	0	0	0	0	0	0	0	0	0	0	0	0	0	0	0	0	0	0	0	0	0	0
Bacteria|Actinobacteria|Actinobacteria|Propionibacteriales|Nocardioidaceae|Nocardioides	0	0	0	0.00386698	0	0	0	0	0	0	0	0	0	0	0	0	0	0	0	0	0	0	0.0402166	0	0	0	0	0	0	0	0	0	0	0	0	0	0	0	0	0	0	0	0.00154679	0	0	0	0	0	0
Bacteria|Actinobacteria|Actinobacteria|Propionibacteriales|Propionibacteriaceae|Propionibacterium	0	0	0	0	0	0	0	0	0	0	0	0	0	0	0	0	0	0	0	0	0	0	0	0	0	0	0	0	0	0	0	0	0	0	0	0.000773395	0	0	0	0	0	0	0	0	0	0	0	0	0
Bacteria|Actinobacteria|Actinobacteria|Pseudonocardiales|Pseudonocardiaceae|Pseudonocardia	0	0	0	0	0	0	0	0	0.000773395	0	0	0	0	0	0	0	0	0	0	0	0	0	0	0	0	0	0	0	0	0	0	0	0	0	0	0	0	0	0	0.000773395	0	0	0	0.00773395	0	0	0	0	0
Bacteria|Actinobacteria|Actinobacteria|Pseudonocardiales|Pseudonocardiaceae|Saccharopolyspora	0	0	0	0	0	0	0	0	0	0	0	0	0	0	0	0	0	0	0	0	0	0	0	0	0	0	0	0	0	0	0	0	0	0	0	0	0	0	0.00154679	0	0	0	0	0	0	0.000773395	0	0	0
Bacteria|Actinobacteria|Actinobacteria|Streptomycetales|Streptomycetaceae|Streptomycetaceae	0	0	0	0	0	0	0	0	0	0	0	0	0	0	0	0	0	0	0	0	0	0	0	0	0	0	0	0	0	0	0	0	0	0	0	0	0	0	0	0	0	0	0	0	0	0	0.00154679	0	0
Bacteria|Actinobacteria|Actinobacteria|Streptosporangiales|Nocardiopsaceae|Nocardiopsis	0	0	0	0	0	0	0	0	0	0	0	0	0	0	0	0	0	0	0	0	0	0	0	0	0	0	0	0	0	0	0	0	0	0	0	0	0	0	0	0	0	0	0	0	0	0	0.000773395	0	0
Bacteria|Actinobacteria|Coriobacteriia|Coriobacteriales|Coriobacteriaceae|Collinsella	0.000773395	0.00386698	0	0	0	0	0	0.00696056	0	0.00154679	0	0	0	0	0	0	0	0	0	0	0	0	0	0.0139211	0	0.00232019	0	0.00541377	0	0	0	0.00154679	0	0	0	0	0	0	0	0.00154679	0	0	0.00309358	0.00309358	0	0	0	0.00154679	0
Bacteria|Actinobacteria|Coriobacteriia|Coriobacteriales|Coriobacteriaceae|Coriobacteriaceae	0	0	0	0.00386698	0	0	0	0	0	0	0	0.00154679	0	0	0.000773395	0	0	0	0	0	0.000773395	0	0	0	0	0	0.000773395	0	0	0.00232019	0	0	0	0	0	0	0.000773395	0	0	0.000773395	0	0	0	0	0	0.00541377	0	0	0
Bacteria|Actinobacteria|Coriobacteriia|Coriobacteriales|Coriobacteriaceae|Enterorhabdus	0	0	0	0	0	0	0	0	0	0	0.000773395	0	0	0	0	0	0	0.000773395	0	0	0	0	0	0	0	0	0	0	0	0	0	0	0.000773395	0	0	0	0.000773395	0	0	0.00154679	0	0	0	0	0	0	0	0	0
Bacteria|Actinobacteria|Coriobacteriia|Coriobacteriales|Coriobacteriaceae|Senegalimassilia	0	0	0	0.00309358	0.00232019	0	0	0	0	0	0	0	0	0	0.00232019	0	0	0	0	0	0	0	0	0	0	0	0	0.00309358	0	0	0	0	0	0	0	0	0	0	0.00464037	0	0	0.000773395	0	0	0	0	0	0	0.00541377
Bacteria|Actinobacteria|Coriobacteriia|Coriobacteriales|Coriobacteriaceae|Slackia	0	0	0.000773395	0	0	0.000773395	0	0.00386698	0	0.00154679	0	0	0	0	0	0	0	0	0	0	0	0	0	0	0	0	0	0	0	0	0	0	0	0	0	0	0	0	0	0	0	0	0	0	0	0	0	0	0.00618716
Bacteria|Actinobacteria|Rubrobacteria|Rubrobacterales|Rubrobacteriaceae|Rubrobacter	0	0	0	0	0	0	0	0	0	0	0	0	0	0	0	0	0	0	0	0	0	0	0.00154679	0	0	0	0	0	0	0	0	0	0	0	0	0	0	0	0	0	0	0	0	0	0	0	0	0	0
Bacteria|Actinobacteria|Thermoleophilia|Gaiellales|Gaiellaceae|Gaiella	0	0.00154679	0	0	0	0	0	0	0	0	0	0	0	0	0	0	0	0	0	0	0	0	0	0	0	0	0	0	0	0	0	0	0	0	0	0	0	0	0	0	0	0	0	0.000773395	0	0	0	0	0
Bacteria|Actinobacteria|Thermoleophilia|Gaiellales|Gaiellales|Gaiellales	0	0	0	0	0	0	0	0	0	0	0	0	0	0	0	0	0	0	0	0	0	0	0.000773395	0	0	0	0	0	0	0	0	0	0	0	0	0	0	0	0	0	0	0	0	0	0	0	0	0	0
Bacteria|Actinobacteria|Thermoleophilia|Solirubrobacterales|Parviterribacteraceae|Parviterribacter	0	0	0	0	0	0	0	0	0	0	0	0	0	0	0	0	0	0	0	0	0	0	0.00386698	0	0	0	0	0	0	0	0	0	0	0	0	0	0	0	0	0	0	0	0	0	0	0	0	0	0
Bacteria|Actinobacteria|Thermoleophilia|Solirubrobacterales|Patulibacteraceae|Patulibacter	0	0	0	0	0	0	0	0	0	0	0	0	0	0	0	0	0	0	0	0	0	0	0.00309358	0	0	0	0	0	0	0	0	0	0	0	0	0	0	0	0	0	0	0	0	0	0	0	0	0	0
Bacteria|Actinobacteria|Thermoleophilia|Solirubrobacterales|Solirubrobacteraceae|Solirubrobacter	0	0	0	0.000773395	0	0	0	0	0	0	0	0	0	0	0	0	0	0	0	0	0	0	0	0	0	0	0	0	0	0	0	0	0	0	0	0	0	0	0	0	0	0	0	0.00309358	0	0	0	0	0
Bacteria|Actinobacteria|Thermoleophilia|Solirubrobacterales|Solirubrobacterales|Solirubrobacterales	0	0	0	0.000773395	0	0	0	0	0.00154679	0	0	0	0	0	0	0	0	0	0	0	0	0	0.00309358	0	0	0	0	0	0	0	0	0	0	0	0	0	0	0	0	0	0	0	0	0	0	0	0	0	0
Bacteria|Bacteroidetes|Bacteroidia|Bacteroidales|Bacteroidaceae|Bacteroides	0.0696056	0.0317092	0.0232019	0.0525909	0.00232019	0.0100541	0.00928074	0.0100541	0.00541377	0.0170147	0.0208817	0.0510441	0.109822	0.156226	0.176334	0.191029	0.150039	0.170147	0.025522	0.0100541	0.0533643	0.0479505	0	0.00309358	0.110596	0.0340294	0.240526	0.111369	0.105955	0.180201	0.0456303	0.00464037	0.0634184	0.0123743	0.0247486	0	0.00696056	0.00618716	0.00773395	0.0409899	0.109822	0.0116009	0.000773395	0.025522	0	0.0556845	0	0.0262954	0
Bacteria|Bacteroidetes|Bacteroidia|Bacteroidales|Bacteroidales|Bacteroidales	0.221964	0.146172	0.0781129	0.139211	0.112142	0.118329	0.302398	0.0340294	0.033256	0.0850735	0.354988	0.150812	0.372776	0.481825	0.20495	0.338747	0.283063	0.399845	0.0541377	0.634184	0.136118	0.408353	0	0.114462	0.493426	0.029389	0.195669	0.0928074	0.140758	0.24594	0.624903	0.029389	0.655839	0.0456303	0.643465	0.0425367	0.71307	0.0146945	0.163186	0.135344	0.675947	0.0131477	0.000773395	0.0827533	0.0232019	0.0928074	0.00850735	0.0850735	0.0239753
Bacteria|Bacteroidetes|Bacteroidia|Bacteroidales|Porphyromonadaceae|Barnesiella	0	0	0	0	0	0	0	0	0	0.00541377	0	0	0	0	0	0	0	0	0	0	0	0	0	0	0	0	0	0	0	0.000773395	0	0	0	0	0	0	0	0	0	0	0	0	0	0	0	0	0	0	0
Bacteria|Bacteroidetes|Bacteroidia|Bacteroidales|Porphyromonadaceae|Butyricimonas	0	0	0	0	0	0	0	0	0	0	0	0	0.00154679	0	0	0	0.000773395	0	0	0	0	0	0	0	0	0	0	0	0	0.000773395	0	0	0	0	0	0	0	0	0	0	0	0	0	0	0	0	0	0	0
Bacteria|Bacteroidetes|Bacteroidia|Bacteroidales|Porphyromonadaceae|Parabacteroides	0	0.00386698	0	0.0340294	0	0.00386698	0	0.00618716	0.00232019	0.0108275	0	0.0286156	0.0471771	0	0.156999	0	0.334107	0	0	0	0.00232019	0.0262954	0	0.0464037	0	0.0185615	0	0.107502	0	0.116783	0	0.00154679	0	0.0464037	0	0	0	0.00232019	0	0.00386698	0	0	0	0.00696056	0	0.00232019	0	0.000773395	0
Bacteria|Bacteroidetes|Bacteroidia|Bacteroidales|Porphyromonadaceae|Porphyromonas	0	0	0	0	0	0	0	0	0	0	0	0	0	0	0	0	0	0	0	0	0	0	0	0	0	0	0	0	0	0	0	0	0	0	0	0.000773395	0	0	0	0	0	0	0.000773395	0	0	0	0	0	0.00154679
Bacteria|Bacteroidetes|Bacteroidia|Bacteroidales|Porphyromonadaceae|Proteiniphilum	0	0	0	0	0	0	0	0	0	0	0	0	0	0	0	0	0	0	0	0	0.000773395	0	0	0	0	0	0	0	0	0	0	0	0	0	0	0	0	0	0	0	0	0	0	0	0	0	0	0	0
Bacteria|Bacteroidetes|Bacteroidia|Bacteroidales|Prevotellaceae|Alloprevotella	0	0	0	0	0	0	0	0	0	0	0.00154679	0	0	0	0	0	0	0	0	0	0	0	0	0	0	0	0	0	0	0	0	0	0	0	0	0	0	0	0	0	0	0	0	0	0	0	0	0	0
Bacteria|Bacteroidetes|Bacteroidia|Bacteroidales|Prevotellaceae|Paraprevotella	0	0	0	0.00386698	0	0	0	0	0	0	0	0.0108275	0.00309358	0	0.00386698	0	0.000773395	0	0.00541377	0	0.000773395	0.00309358	0	0	0	0	0	0.00696056	0	0.00309358	0	0	0	0	0	0	0	0	0	0	0	0	0	0	0	0.00309358	0	0.00386698	0
Bacteria|Bacteroidetes|Bacteroidia|Bacteroidales|Prevotellaceae|Prevotella	0	0	0	0	0	0	0	0	0	0	0	0	0	0	0	0	0	0	0	0	0	0	0	0.000773395	0	0	0	0	0	0	0	0	0	0	0	0	0	0	0	0	0	0	0	0	0	0	0	0	0
Bacteria|Bacteroidetes|Bacteroidia|Bacteroidales|Prevotellaceae|Prevotellaceae	0	0.0177881	0	0.00464037	0	0.00541377	0	0.0116009	0	0.037123	0	0.0487239	0.0649652	0	0.0765661	0	0.114462	0	0.00696056	0	0.0317092	0.00773395	0.000773395	0	0	0.00309358	0	0.0471771	0	0.0742459	0	0	0	0.00618716	0	0.00696056	0	0.00232019	0	0.0116009	0	0	0	0.00232019	0	0.00928074	0	0.0409899	0
Bacteria|Bacteroidetes|Bacteroidia|Bacteroidales|Rikenellaceae|Alistipes	0	0.00541377	0	0.0100541	0	0.00464037	0	0	0	0	0	0.000773395	0.0177881	0	0.00773395	0	0.0116009	0	0	0	0.00309358	0.00773395	0	0	0	0.00541377	0	0	0	0.00541377	0	0	0	0	0	0	0	0	0	0.00309358	0	0	0	0.00386698	0	0.00618716	0	0	0.00696056
Bacteria|Bacteroidetes|Bacteroidia|Bacteroidales|Rikenellaceae|Rikenellaceae	0	0	0	0	0	0.000773395	0	0	0	0	0	0	0	0	0	0	0	0	0	0	0	0.000773395	0	0	0	0	0	0	0	0	0	0	0	0	0	0	0	0	0	0	0	0	0	0	0	0	0	0	0
Bacteria|Bacteroidetes|Cytophagia|Cytophagales|Cytophagaceae|Dyadobacter	0	0	0	0	0	0	0	0	0	0	0	0	0	0	0	0	0	0	0	0	0	0	0	0	0	0	0	0	0	0	0	0	0	0	0	0	0	0	0	0	0	0	0	0	0	0	0	0	0
Bacteria|Bacteroidetes|Cytophagia|Cytophagales|Cytophagaceae|Hymenobacter	0	0	0	0.00309358	0	0	0	0	0	0	0	0	0	0	0	0	0	0	0	0	0	0	0	0	0	0	0	0	0	0	0	0	0	0	0	0	0	0	0	0	0	0	0	0	0	0	0	0	0
Bacteria|Bacteroidetes|Cytophagia|Cytophagales|Cytophagaceae|Nibrella	0	0	0	0	0	0	0	0	0	0	0	0	0	0	0	0	0	0	0	0	0	0	0.119103	0	0	0	0	0	0	0	0	0	0	0	0	0	0	0	0	0	0	0	0	0	0	0	0	0	0
Bacteria|Bacteroidetes|Cytophagia|Cytophagales|Cytophagaceae|Spirosoma	0	0	0	0	0	0	0	0	0	0	0.000773395	0	0.00232019	0	0	0	0	0	0	0	0	0	0	0	0	0	0	0	0	0	0	0	0	0	0	0	0	0	0	0	0	0	0	0	0	0	0	0	0
Bacteria|Bacteroidetes|Flavobacteriia|Flavobacteriales|Flavobacteriaceae|Chryseobacterium	0	0	0	0.000773395	0	0	0	0	0	0	0	0	0	0	0	0	0	0	0	0	0	0	0	0	0	0	0	0	0	0	0	0	0	0	0	0	0	0	0	0	0	0	0	0	0	0	0	0	0.00464037
Bacteria|Bacteroidetes|Flavobacteriia|Flavobacteriales|Flavobacteriaceae|Cloacibacterium	0	0	0	0.00232019	0	0	0	0	0.000773395	0	0	0	0.00232019	0	0	0	0	0	0	0	0.0139211	0	0	0	0	0	0	0	0	0	0	0	0	0	0	0	0	0	0	0	0	0	0	0.000773395	0	0	0.0185615	0	0.00309358
Bacteria|Bacteroidetes|Flavobacteriia|Flavobacteriales|Flavobacteriaceae|Flavobacterium	0	0	0	0.00464037	0	0	0	0	0	0	0	0	0	0	0	0	0	0	0	0	0	0	0	0	0	0	0	0	0	0	0	0	0	0	0	0	0	0	0	0	0	0	0	0	0	0	0	0	0
Bacteria|Bacteroidetes|Flavobacteriia|Flavobacteriales|Flavobacteriaceae|Myroides	0	0	0	0	0	0	0	0	0.00232019	0	0	0	0	0	0	0	0	0	0	0	0	0	0	0	0	0	0	0	0	0	0	0	0	0	0	0	0	0.00154679	0	0	0	0	0	0	0	0	0	0	0
Bacteria|Bacteroidetes|Sphingobacteriia|Sphingobacteriales|Chitinophagaceae|Ferruginibacter	0	0	0	0	0	0	0	0	0	0	0	0	0	0	0	0	0	0	0	0	0	0	0.00696056	0	0	0	0	0	0	0	0	0	0	0	0	0	0	0	0	0	0	0	0	0	0	0	0	0	0
Bacteria|Bacteroidetes|Sphingobacteriia|Sphingobacteriales|Chitinophagaceae|Flavisolibacter	0	0	0	0	0	0	0	0	0	0	0	0	0	0	0	0	0	0	0	0	0	0	0.0270688	0	0	0	0	0	0	0	0	0	0	0	0	0	0	0	0	0	0	0	0	0	0	0	0	0	0
Bacteria|Bacteroidetes|Sphingobacteriia|Sphingobacteriales|Chitinophagaceae|Segetibacter	0	0	0	0	0	0	0	0	0	0.00154679	0	0	0	0	0	0	0	0	0	0	0	0	0	0	0	0	0	0	0	0	0	0	0	0	0	0	0	0	0	0	0	0	0	0	0	0	0	0	0
Bacteria|Bacteroidetes|Sphingobacteriia|Sphingobacteriales|Saprospiraceae|Saprospiraceae	0	0	0	0	0	0	0	0	0	0	0	0	0	0	0	0	0	0	0	0	0	0	0.00309358	0	0	0	0	0	0	0	0	0	0	0	0	0	0	0	0	0	0	0	0	0	0	0	0	0	0
Bacteria|Bacteroidetes|Sphingobacteriia|Sphingobacteriales|Sphingobacteriaceae|Mucilaginibacter	0	0	0	0	0	0	0	0	0	0	0	0	0	0	0	0	0	0	0	0	0	0	0	0	0	0	0	0	0	0	0	0	0	0	0	0	0	0	0	0	0	0	0	0	0	0	0	0	0
Bacteria|Bacteroidetes|Sphingobacteriia|Sphingobacteriales|Sphingobacteriaceae|Pedobacter	0	0	0	0	0	0	0.000773395	0	0	0	0	0	0	0	0	0	0	0	0	0.00386698	0	0	0	0	0	0	0	0	0	0	0	0	0	0	0	0	0	0	0	0	0	0	0	0	0	0	0	0	0
Bacteria|Bacteroidetes|Sphingobacteriia|Sphingobacteriales|Sphingobacteriaceae|Sphingobacterium	0	0	0	0	0	0	0	0	0	0	0	0	0	0	0	0	0	0	0	0	0	0	0	0	0	0	0	0	0	0	0	0	0	0	0	0	0	0	0	0	0	0	0	0	0	0	0	0	0
Bacteria|Cyanobacteria|Chloroplast|Chloroplast|Chloroplast|Chloroplast	0.242846	0.0912606	0.474865	0.025522	0.630317	0.0726991	0.406806	0.00309358	0.634184	0.138438	0.215777	0.162413	0.092034	0	0	0	0.000773395	0	0.174014	0.225058	0.151585	0.00154679	0.143852	0.309358	0	0.512761	0.000773395	0.000773395	0	0	0	0.185615	0	0.449343	0	0.637278	0	0.1686	0.484919	0.0170147	0	0.28693	0.468677	0.1686	0.897138	0.146945	0.906419	0.0982212	0.16628
Bacteria|Cyanobacteria|Cyanobacteria|Cyanobacteria|Cyanobacteria|Cyanobacteria	0	0	0	0	0	0	0	0	0	0	0	0	0	0	0	0	0	0	0	0	0	0	0.0417633	0	0	0	0	0	0	0	0	0	0	0	0	0	0	0	0	0	0	0	0	0	0	0	0	0	0
Bacteria|Cyanobacteria|Cyanobacteria|Cyanobacteria|Cyanobacteria|Microcoleus	0	0	0	0	0	0.00154679	0	0	0	0	0	0	0	0	0	0	0	0	0	0	0	0	0	0	0	0	0	0	0	0	0	0	0	0	0	0	0	0	0	0	0	0	0	0	0	0	0	0	0
Bacteria|Cyanobacteria|Melainabacteria|Gastranaerophilales|Gastranaerophilales|Gastranaerophilales	0	0	0	0.00696056	0	0.00309358	0	0	0	0	0	0	0.00773395	0	0.00232019	0	0.00696056	0	0.00309358	0	0.000773395	0.0348028	0	0	0	0.000773395	0	0.00773395	0	0.00154679	0	0	0	0	0	0	0	0	0	0.00386698	0	0	0	0	0	0.00309358	0	0	0
Bacteria|Deferribacteres|Deferribacteres|Deferribacterales|Deferribacteraceae|Mucispirillum	0	0	0	0	0	0	0	0	0	0	0	0	0	0	0	0	0	0	0.0100541	0	0	0	0	0	0	0	0	0	0	0	0	0	0	0	0	0	0	0	0	0	0	0	0	0	0	0	0	0	0
Bacteria|Deinococcus_Thermus|Deinococci|Deinococcales|Deinococcaceae|Deinococcus	0	0	0	0	0	0	0	0	0	0	0	0	0	0	0	0	0	0	0	0	0	0	0.0518175	0	0	0	0	0	0	0	0	0	0	0	0	0	0	0	0	0	0	0	0	0	0	0	0	0	0
Bacteria|Firmicutes|Bacilli|Bacillales|Alicyclobacillaceae|Tumebacillus	0	0	0	0	0	0	0	0	0	0	0	0	0	0	0	0	0	0	0	0	0	0	0	0	0	0	0	0	0	0	0	0	0	0	0	0	0	0	0	0.000773395	0	0	0	0	0	0	0	0	0
Bacteria|Firmicutes|Bacilli|Bacillales|Bacillaceae|Anoxybacillus	0	0	0	0	0	0	0	0	0	0	0	0	0	0	0	0	0	0	0	0	0	0	0	0	0	0	0	0.000773395	0	0	0	0	0	0	0	0	0	0	0	0	0	0	0	0	0	0	0	0	0
Bacteria|Firmicutes|Bacilli|Bacillales|Bacillaceae|Bacillaceae	0	0	0	0	0	0	0.000773395	0	0	0	0	0	0	0	0	0	0	0	0	0	0	0	0	0	0	0	0	0	0	0	0	0	0	0	0	0	0	0	0	0	0	0	0.000773395	0	0	0	0	0	0
Bacteria|Firmicutes|Bacilli|Bacillales|Bacillaceae|Bacillus	0	0	0	0	0	0	0	0	0.00309358	0	0.00386698	0	0	0	0	0	0	0	0	0	0	0	0	0	0	0	0	0	0	0	0	0	0	0	0	0	0	0	0	0	0	0	0	0	0	0	0	0	0
Bacteria|Firmicutes|Bacilli|Bacillales|Bacillaceae|Geobacillus	0.00154679	0	0	0	0.00232019	0	0	0	0.000773395	0	0.000773395	0	0	0	0	0	0	0	0	0	0.000773395	0	0	0	0	0.000773395	0	0	0	0	0	0	0	0	0	0	0	0	0.000773395	0	0	0	0.00773395	0	0	0	0.00232019	0	0
Bacteria|Firmicutes|Bacilli|Bacillales|Bacillaceae|Lentibacillus	0	0	0	0	0	0	0	0	0	0.00232019	0	0	0	0	0	0	0	0	0	0	0	0	0	0	0	0	0	0	0	0	0	0	0	0	0	0	0	0	0	0	0	0	0	0	0	0	0	0	0
Bacteria|Firmicutes|Bacilli|Bacillales|Bacillaceae|Oceanobacillus	0.000773395	0	0	0	0	0	0	0	0	0	0	0	0	0	0	0	0	0	0	0	0	0	0	0	0	0	0	0	0	0	0	0	0	0	0	0	0	0	0	0	0	0	0	0	0	0	0	0	0
Bacteria|Firmicutes|Bacilli|Bacillales|Bacillaceae|Paraliobacillus	0	0	0	0	0	0.000773395	0	0	0	0	0	0	0	0	0	0	0	0	0	0	0	0	0	0	0	0.00850735	0	0	0	0	0	0.0177881	0	0.0471771	0	0.0116009	0	0.0873937	0	0	0	0.0464037	0	0	0	0	0	0	0
Bacteria|Firmicutes|Bacilli|Bacillales|Bacillaceae|Ureibacillus	0	0	0	0	0	0	0	0	0	0	0	0	0	0	0	0	0	0	0	0	0	0	0	0	0	0	0	0	0	0	0	0	0	0	0	0	0	0	0	0	0	0	0	0	0.00154679	0	0	0	0
Bacteria|Firmicutes|Bacilli|Bacillales|Bacillaceae|Virgibacillus	0.00232019	0	0	0	0	0	0	0	0	0	0	0	0	0	0	0	0	0	0	0	0	0	0	0	0	0	0	0	0	0	0	0	0	0	0	0	0	0	0	0	0	0	0	0	0	0	0	0	0
Bacteria|Firmicutes|Bacilli|Bacillales|Bacillales|Exiguobacterium	0	0	0.000773395	0	0	0	0	0	0	0	0	0	0	0	0	0	0	0	0	0	0	0	0	0	0	0	0	0	0	0	0	0	0	0	0	0	0	0	0	0	0	0	0	0	0	0	0	0	0.00154679
Bacteria|Firmicutes|Bacilli|Bacillales|Bacillales|Gemella	0	0	0	0	0.00154679	0	0	0	0	0	0.000773395	0	0	0	0	0	0	0	0	0	0	0	0	0	0	0	0	0	0	0	0	0	0	0	0	0	0	0	0	0	0	0	0	0	0	0	0	0	0
Bacteria|Firmicutes|Bacilli|Bacillales|Paenibacillaceae|Paenibacillus	0.000773395	0	0.00309358	0	0	0	0	0	0.000773395	0	0	0	0	0	0	0	0	0	0.00154679	0	0	0	0	0	0	0	0	0	0	0	0	0	0	0	0	0	0	0	0	0	0	0	0.00309358	0	0	0	0	0	0
Bacteria|Firmicutes|Bacilli|Bacillales|Paenibacillaceae|Saccharibacillus	0	0	0	0	0	0	0	0	0	0	0.000773395	0	0	0	0	0	0	0	0	0	0	0	0	0	0	0	0	0	0	0	0	0	0	0	0	0	0	0	0	0	0	0	0	0	0.000773395	0	0	0	0
Bacteria|Firmicutes|Bacilli|Bacillales|Planococcaceae|Sporosarcina	0	0	0	0	0	0.00541377	0	0	0	0	0	0.000773395	0.00386698	0	0	0	0	0	0	0	0	0	0	0.00928074	0	0.0270688	0	0	0	0	0	0.245166	0	0.122196	0	0.0572312	0	0.234339	0	0	0	0.143078	0	0.00232019	0	0	0	0	0
Bacteria|Firmicutes|Bacilli|Bacillales|Staphylococcaceae|Jeotgalicoccus	0	0	0	0	0	0.00232019	0	0	0	0	0	0	0	0	0	0	0	0	0	0	0.00154679	0	0	0	0	0.00696056	0	0	0	0	0	0.0154679	0	0.00850735	0	0.0355762	0	0.0154679	0	0	0	0.0162413	0	0	0	0	0.000773395	0	0
Bacteria|Firmicutes|Bacilli|Bacillales|Staphylococcaceae|Staphylococcus	0.00309358	0	0	0.00154679	0.000773395	0.00386698	0.00386698	0.00696056	0.0239753	0	0.0100541	0.00541377	0.00386698	0	0	0	0	0	0.00386698	0.00154679	0.000773395	0	0.00232019	0.0595514	0	0.0193349	0	0.105955	0	0	0	0.0286156	0	0.0216551	0	0.00386698	0	0.0270688	0.00386698	0	0	0.0386698	0.00464037	0.00464037	0	0.00309358	0.00464037	0.0170147	0
Bacteria|Firmicutes|Bacilli|Lactobacillales|Aerococcaceae|Aerococcus	0	0	0	0	0	0	0	0	0	0	0	0	0	0	0	0	0	0	0	0	0	0	0	0	0	0.00232019	0	0	0	0	0	0	0	0	0	0	0	0	0	0	0	0	0	0	0	0	0	0	0
Bacteria|Firmicutes|Bacilli|Lactobacillales|Carnobacteriaceae|Atopostipes	0	0	0	0	0	0.00850735	0	0	0	0	0	0	0	0	0	0	0	0	0.00232019	0.00154679	0.000773395	0	0	0	0	0.0232019	0	0	0	0	0	0.0471771	0	0.104408	0	0.0278422	0	0.165507	0	0	0	0.143078	0	0	0	0	0	0	0
Bacteria|Firmicutes|Bacilli|Lactobacillales|Carnobacteriaceae|Carnobacterium	0	0	0.00232019	0	0	0	0	0	0.000773395	0	0	0	0	0	0	0	0	0	0	0	0	0	0	0	0	0.00154679	0	0	0	0	0	0	0	0	0	0	0	0	0	0	0	0.000773395	0	0	0	0	0	0	0
Bacteria|Firmicutes|Bacilli|Lactobacillales|Lactobacillaceae|Lactobacillus	0.0177881	0.0456303	0.00464037	0.0216551	0.00309358	0.037123	0.000773395	0.0247486	0.00773395	0.025522	0.00850735	0.0216551	0.029389	0.0278422	0.0239753	0.0239753	0.000773395	0.0146945	0.029389	0	0.0154679	0.0556845	0	0.0425367	0.00928074	0	0.00232019	0.0154679	0.00618716	0.029389	0.00850735	0.00464037	0.00928074	0.00696056	0.0116009	0.0170147	0.0402166	0.00309358	0.00232019	0.0672854	0.00850735	0.00309358	0.000773395	0.033256	0.00154679	0.0572312	0.00309358	0.0177881	0.000773395
Bacteria|Firmicutes|Bacilli|Lactobacillales|Leuconostocaceae|Leuconostoc	0	0	0	0	0.000773395	0	0	0	0	0	0	0	0	0	0	0	0	0	0	0.000773395	0	0	0	0	0	0	0	0	0	0	0	0	0	0	0	0	0	0	0	0	0	0	0	0	0	0	0	0	0
Bacteria|Firmicutes|Bacilli|Lactobacillales|Leuconostocaceae|Weissella	0.00154679	0	0.00154679	0	0.00154679	0	0	0	0.00773395	0	0.00232019	0.000773395	0	0	0	0	0	0	0	0.00154679	0	0	0	0	0	0	0	0	0	0	0	0	0	0	0	0	0	0	0.00850735	0	0	0	0.00464037	0	0.00154679	0	0.00154679	0	0
Bacteria|Firmicutes|Bacilli|Lactobacillales|Streptococcaceae|Lactococcus	0	0.00232019	0	0.00541377	0	0	0	0	0.00232019	0	0	0	0.00386698	0	0	0	0	0	0.00309358	0	0	0	0	0	0	0	0	0.00464037	0	0	0	0	0	0	0	0	0	0	0	0.00154679	0	0	0	0.000773395	0	0	0	0	0
Bacteria|Firmicutes|Bacilli|Lactobacillales|Streptococcaceae|Streptococcus	0.0417633	0	0.0688322	0	0.0394432	0.000773395	0.058778	0	0.0819799	0.000773395	0.0348028	0.000773395	0.00232019	0	0.000773395	0	0	0	0.000773395	0.0286156	0	0	0	0.0123743	0	0.00386698	0	0	0	0	0	0.00309358	0	0.00696056	0	0.0139211	0	0.00309358	0.0409899	0.00232019	0	0.0123743	0.0657386	0.0116009	0.00773395	0.00541377	0.0116009	0.00541377	0.00618716
Bacteria|Firmicutes|Clostridia|Clostridiales|Caldicoprobacteraceae|Caldicoprobacter	0	0	0	0	0	0	0	0	0	0	0	0	0	0	0	0	0	0	0	0.000773395	0	0	0	0	0	0	0	0	0	0	0	0	0	0	0	0	0	0	0	0	0	0	0	0	0	0	0	0	0
Bacteria|Firmicutes|Clostridia|Clostridiales|Christensenellaceae|Christensenellaceae	0	0.0139211	0	0.0324826	0	0.0340294	0	0.0193349	0	0.00541377	0.00154679	0	0.000773395	0	0.00309358	0	0	0.000773395	0.000773395	0	0.0100541	0	0	0	0	0	0	0	0	0.00696056	0.000773395	0	0	0	0	0	0	0	0	0.0146945	0	0	0	0.0177881	0	0.00773395	0	0.0139211	0
Bacteria|Firmicutes|Clostridia|Clostridiales|Clostridiales|Anaerococcus	0	0	0	0	0	0	0	0	0	0	0.00154679	0	0	0	0	0	0	0	0	0	0	0	0	0	0	0	0	0	0	0	0	0	0	0	0	0	0	0	0	0	0	0	0	0	0	0	0	0	0
Bacteria|Firmicutes|Clostridia|Clostridiales|Clostridiales|Anaerovorax	0	0	0	0	0	0.00232019	0	0	0	0	0	0	0	0	0.00154679	0	0	0	0	0	0.00154679	0	0	0	0	0	0	0	0	0	0	0	0	0	0	0	0	0	0	0	0	0	0	0	0	0	0	0	0
Bacteria|Firmicutes|Clostridia|Clostridiales|Clostridiales|Candidatus_Arthromitus	0	0.00232019	0	0.00154679	0	0	0	0	0	0	0	0	0	0	0	0	0	0	0	0	0	0	0	0	0	0	0	0	0	0	0	0	0	0	0	0	0	0	0	0	0	0	0	0	0	0	0	0	0
Bacteria|Firmicutes|Clostridia|Clostridiales|Clostridiales|Clostridiales	0.0402166	0.0572312	0.112916	0.0494973	0.0564578	0.0363496	0.0634184	0.242846	0.0479505	0.165507	0.029389	0.133797	0.00464037	0.00232019	0.0262954	0.000773395	0.0131477	0.0123743	0.116783	0.00154679	0.00541377	0	0	0	0.00386698	0.0850735	0.00850735	0.092034	0.0355762	0.00618716	0.00696056	0.144625	0.00154679	0	0.00154679	0	0.00386698	0.0750193	0.0649652	0.058778	0.00386698	0.0912606	0.129157	0.0928074	0	0.0456303	0.000773395	0.177108	0.269142
Bacteria|Firmicutes|Clostridia|Clostridiales|Clostridiales|Ezakiella	0	0	0	0	0	0	0	0	0	0	0.00154679	0	0	0	0	0	0	0	0	0	0	0	0	0	0	0	0	0	0	0	0	0	0	0	0	0	0	0	0	0	0	0	0	0	0	0	0	0	0
Bacteria|Firmicutes|Clostridia|Clostridiales|Clostridiales|Finegoldia	0	0	0	0	0	0	0	0	0	0	0	0	0	0	0	0	0	0	0	0	0	0	0	0	0	0	0	0	0	0	0	0	0	0	0	0	0	0	0	0	0	0	0	0	0	0	0	0	0.00386698
Bacteria|Firmicutes|Clostridia|Clostridiales|Clostridiales|Gallicola	0	0	0	0	0	0	0.00154679	0	0	0	0	0	0	0	0	0	0	0	0	0	0	0	0	0	0	0	0	0	0	0	0	0	0	0	0	0	0	0	0	0	0	0	0	0	0	0	0	0	0
Bacteria|Firmicutes|Clostridia|Clostridiales|Clostridiales|Mogibacterium	0	0	0	0	0	0	0	0	0	0	0	0	0	0	0	0	0	0	0	0	0	0	0	0	0	0	0	0	0	0	0	0	0	0	0	0	0	0	0	0	0	0	0	0	0	0	0	0.00464037	0
Bacteria|Firmicutes|Clostridia|Clostridiales|Clostridiales|Parvimonas	0	0	0	0	0	0	0	0	0	0	0.00154679	0	0	0	0	0	0	0	0	0	0	0	0	0	0	0	0	0	0	0	0	0	0	0	0	0	0	0	0	0	0	0	0	0	0	0	0	0	0
Bacteria|Firmicutes|Clostridia|Clostridiales|Clostridiales|Peptoniphilus	0	0	0	0	0	0	0	0	0	0	0	0	0	0	0	0	0	0	0	0	0	0	0.0146945	0	0	0	0	0	0	0	0	0	0	0	0	0	0	0	0	0	0	0	0	0	0	0	0	0	0
Bacteria|Firmicutes|Clostridia|Clostridiales|Clostridiales|Tepidimicrobium	0	0	0	0	0	0	0	0	0.00154679	0	0	0	0	0	0	0	0	0	0	0	0	0	0	0	0	0	0	0	0	0	0	0	0	0	0	0	0	0	0	0	0	0	0	0	0	0	0	0	0
Bacteria|Firmicutes|Clostridia|Clostridiales|Defluviitaleaceae|Defluviitaleaceae	0	0.000773395	0	0	0	0	0	0	0	0	0	0	0	0	0	0	0	0	0	0	0	0	0	0	0.000773395	0	0	0	0.00154679	0.00154679	0	0	0.000773395	0	0	0	0	0	0	0	0	0	0	0	0	0	0	0	0
Bacteria|Firmicutes|Clostridia|Clostridiales|Eubacteriaceae|Eubacterium	0	0	0	0	0.00232019	0	0	0	0	0	0	0	0	0	0	0	0	0	0.000773395	0	0	0	0	0	0	0	0	0	0	0	0	0	0	0	0	0	0	0	0	0	0	0	0	0	0	0	0	0	0
Bacteria|Firmicutes|Clostridia|Clostridiales|Eubacteriaceae|Garciella	0	0	0	0	0.00154679	0	0	0	0	0	0	0	0	0	0	0	0	0	0	0	0	0	0	0	0	0	0	0	0	0	0	0	0	0	0	0	0	0	0	0	0	0	0	0	0	0	0	0	0
Bacteria|Firmicutes|Clostridia|Clostridiales|Lachnospiraceae|Acetitomaculum	0	0.00232019	0	0.000773395	0	0	0	0	0	0	0	0	0	0	0	0	0	0	0	0	0.000773395	0	0	0	0	0	0	0	0	0	0	0	0.000773395	0	0	0	0	0	0	0.00232019	0	0	0	0	0	0	0	0	0
Bacteria|Firmicutes|Clostridia|Clostridiales|Lachnospiraceae|Anaerostipes	0.00541377	0.00464037	0.00386698	0.00464037	0	0.00232019	0	0.00850735	0.00618716	0.00850735	0.00154679	0.00618716	0	0	0	0	0	0	0.00850735	0	0	0	0	0	0	0.00850735	0	0.0108275	0	0.00154679	0	0.00618716	0	0.00309358	0	0	0	0.0170147	0	0.00386698	0	0.00696056	0.00696056	0.00386698	0	0.00232019	0	0.0100541	0.0146945
Bacteria|Firmicutes|Clostridia|Clostridiales|Lachnospiraceae|Blautia	0.0154679	0.0170147	0.0131477	0.0216551	0.000773395	0.0247486	0.00464037	0.037123	0.00618716	0.0116009	0.00696056	0.0177881	0	0	0.0146945	0.000773395	0	0.0146945	0.0309358	0	0.00696056	0.000773395	0	0	0.000773395	0.0162413	0.00309358	0.0510441	0.00696056	0.0247486	0	0.00928074	0	0.000773395	0.000773395	0.00464037	0.000773395	0.000773395	0.00386698	0.0201083	0	0.0100541	0	0.0170147	0.00154679	0.0146945	0	0.0363496	0.0154679
Bacteria|Firmicutes|Clostridia|Clostridiales|Lachnospiraceae|Epulopiscium	0.00232019	0	0	0	0	0	0	0	0	0	0	0	0	0	0	0	0	0	0	0	0	0	0	0	0	0	0	0	0	0	0	0	0	0	0	0	0	0	0	0	0	0	0	0	0	0	0	0	0
Bacteria|Firmicutes|Clostridia|Clostridiales|Lachnospiraceae|Fusicatenibacter	0	0	0	0.000773395	0	0	0	0	0.00232019	0	0	0	0	0	0	0	0	0	0	0	0	0	0	0	0	0	0	0	0	0	0	0	0	0	0	0	0	0	0	0	0	0.000773395	0	0	0	0	0	0	0
Bacteria|Firmicutes|Clostridia|Clostridiales|Lachnospiraceae|Hungatella	0.00154679	0.00696056	0.00154679	0	0	0	0.00232019	0	0	0	0.000773395	0.00541377	0.00232019	0	0.000773395	0	0	0.00464037	0	0.00154679	0	0.00232019	0	0	0	0	0.000773395	0	0.00309358	0	0.00618716	0	0.00541377	0	0	0	0.0154679	0	0	0	0.00154679	0	0	0	0	0.00232019	0	0.000773395	0.000773395
Bacteria|Firmicutes|Clostridia|Clostridiales|Lachnospiraceae|Lachnoclostridium	0	0.00928074	0	0.0162413	0	0.0131477	0	0.0317092	0	0.00850735	0	0	0.0100541	0	0.0154679	0	0	0	0.0719258	0	0.00618716	0	0	0	0	0	0.000773395	0.0201083	0	0.0201083	0.000773395	0	0	0	0	0	0	0	0	0.0556845	0	0	0	0.00928074	0	0.141531	0	0.00154679	0
Bacteria|Firmicutes|Clostridia|Clostridiales|Lachnospiraceae|Lachnospira	0	0.00541377	0	0.000773395	0	0.000773395	0	0	0	0	0	0	0	0	0	0	0	0	0	0	0	0	0	0	0	0.000773395	0	0	0	0	0	0	0	0	0	0	0	0	0	0.00154679	0	0	0	0	0	0	0	0	0
Bacteria|Firmicutes|Clostridia|Clostridiales|Lachnospiraceae|Lachnospiraceae	0.109822	0.108275	0.0417633	0.0765661	0.0193349	0.122196	0.0170147	0.0456303	0.0154679	0.0378964	0.0696056	0.0487239	0.0533643	0.0247486	0.0402166	0.0456303	0.00928074	0.141531	0.0510441	0.00618716	0.100541	0.137664	0	0.0843001	0.153906	0.00928074	0.351121	0.0177881	0.433101	0.0448569	0.0757927	0.00309358	0.0866203	0.00773395	0.169374	0.00850735	0.0355762	0.0146945	0.00309358	0.112916	0.00850735	0.0162413	0.00773395	0.0657386	0.00850735	0.0881671	0.000773395	0.0726991	0.0162413
Bacteria|Firmicutes|Clostridia|Clostridiales|Lachnospiraceae|Marvinbryantia	0	0.00386698	0	0	0	0.00541377	0	0.00154679	0	0	0	0	0	0	0.00154679	0.00154679	0	0.000773395	0.00464037	0	0.000773395	0	0	0.0116009	0	0	0	0.000773395	0	0.00154679	0	0	0	0	0	0	0	0	0	0.00309358	0	0	0	0	0	0.000773395	0	0	0
Bacteria|Firmicutes|Clostridia|Clostridiales|Lachnospiraceae|Roseburia	0.0108275	0.0154679	0.00773395	0.000773395	0.000773395	0.0193349	0.00154679	0.00773395	0.000773395	0.0116009	0.00232019	0	0	0	0.00309358	0	0	0.0162413	0.0232019	0	0.0170147	0	0	0.0286156	0.0108275	0	0.0108275	0.00773395	0.00232019	0.00773395	0	0	0	0	0.000773395	0	0	0	0	0.029389	0	0	0.00696056	0.00773395	0	0.0317092	0	0	0.000773395
Bacteria|Firmicutes|Clostridia|Clostridiales|Lachnospiraceae|Sellimonas	0	0	0	0	0	0.00154679	0	0	0	0	0	0	0	0	0	0	0	0	0	0	0	0	0	0	0	0	0	0	0	0	0	0	0	0	0	0	0	0	0	0	0	0.000773395	0	0	0	0	0	0	0
Bacteria|Firmicutes|Clostridia|Clostridiales|Lachnospiraceae|Tyzzerella	0	0	0	0	0	0	0	0	0	0	0	0	0	0	0	0	0	0	0	0	0	0	0	0	0	0	0.000773395	0	0.000773395	0	0	0	0	0	0	0	0	0	0	0	0	0	0	0	0	0	0	0	0
Bacteria|Firmicutes|Clostridia|Clostridiales|Peptococcaceae|Peptococcaceae	0.00618716	0.00154679	0.000773395	0	0.000773395	0	0	0	0.00154679	0	0.00541377	0.00154679	0	0.00773395	0.000773395	0.00309358	0	0.00773395	0	0	0	0	0	0	0.0123743	0	0.00541377	0	0.00618716	0.000773395	0.00386698	0	0.0116009	0	0.00618716	0	0.000773395	0.00154679	0	0.00464037	0.00618716	0	0	0.00618716	0	0.00154679	0	0	0
Bacteria|Firmicutes|Clostridia|Clostridiales|Peptococcaceae|Peptococcus	0	0	0	0	0	0	0	0	0	0	0	0	0	0	0.000773395	0	0	0	0	0	0	0	0	0	0	0	0	0	0	0	0	0	0	0	0	0	0	0	0	0	0	0	0	0	0	0	0	0	0
Bacteria|Firmicutes|Clostridia|Clostridiales|Peptostreptococcaceae|Intestinibacter	0.00850735	0.0216551	0.0286156	0.00773395	0.00773395	0.0201083	0.00618716	0.0317092	0.00928074	0.0502707	0.00773395	0.0185615	0	0	0.00232019	0	0	0	0.0278422	0	0	0	0	0	0	0.00618716	0	0.0201083	0	0	0	0.0193349	0	0	0	0	0	0.0162413	0.0193349	0.0232019	0	0.0146945	0.0409899	0.0324826	0	0	0	0.0378964	0.0827533
Bacteria|Firmicutes|Clostridia|Clostridiales|Peptostreptococcaceae|Peptoclostridium	0	0	0	0	0	0	0	0	0	0	0	0	0	0	0	0	0	0	0	0	0	0	0	0	0	0	0	0	0	0	0	0	0	0	0	0	0	0	0	0	0	0	0	0	0	0	0	0	0
Bacteria|Firmicutes|Clostridia|Clostridiales|Peptostreptococcaceae|Peptostreptococcus	0	0	0.00154679	0	0.00154679	0	0	0	0.00309358	0	0.00618716	0	0	0	0	0	0	0	0	0.000773395	0	0	0	0	0	0	0	0	0	0	0	0	0	0	0	0	0	0	0.00232019	0	0	0	0.000773395	0	0	0	0	0	0
Bacteria|Firmicutes|Clostridia|Clostridiales|Peptostreptococcaceae|Romboutsia	0.0131477	0.0262954	0.0286156	0.0278422	0.0402166	0.0278422	0.0340294	0.118329	0.0201083	0.116009	0.0146945	0.0804331	0.00309358	0	0.0146945	0	0	0	0.0688322	0.000773395	0	0	0	0	0	0.0494973	0	0.0549111	0	0.00386698	0	0.0788863	0	0	0	0	0	0.033256	0.0386698	0.0324826	0	0.0386698	0.110596	0.0402166	0	0.0301624	0	0.0835267	0.133797
Bacteria|Firmicutes|Clostridia|Clostridiales|Peptostreptococcaceae|Terrisporobacter	0	0	0.00232019	0	0	0	0	0	0.000773395	0	0.00154679	0	0	0	0	0	0	0	0	0	0	0	0	0	0	0	0	0	0	0	0	0	0	0	0	0	0	0	0	0	0	0	0	0	0	0	0	0	0
Bacteria|Firmicutes|Clostridia|Clostridiales|Ruminococcaceae|Anaerotruncus	0.00618716	0	0	0.00154679	0	0.00232019	0	0.00232019	0	0	0	0	0	0.00154679	0.000773395	0.000773395	0	0.00386698	0.00386698	0	0.00232019	0	0	0	0.00309358	0.00386698	0.00618716	0	0.0270688	0	0.00154679	0.000773395	0.000773395	0	0.00464037	0	0	0	0	0	0	0	0	0.00154679	0	0.000773395	0	0	0
Bacteria|Firmicutes|Clostridia|Clostridiales|Ruminococcaceae|Butyricicoccus	0	0	0	0	0	0.00696056	0	0	0	0	0	0	0	0	0.000773395	0	0	0	0	0	0	0	0	0	0	0	0	0	0	0	0.000773395	0	0	0	0	0	0	0	0	0	0	0	0	0	0	0	0	0	0
Bacteria|Firmicutes|Clostridia|Clostridiales|Ruminococcaceae|Candidatus_Soleaferrea	0	0	0	0	0	0	0	0	0	0	0	0	0	0	0	0	0	0	0	0	0	0	0	0	0	0	0	0	0	0	0	0	0	0	0	0	0	0	0	0	0	0	0	0.000773395	0	0	0	0	0
Bacteria|Firmicutes|Clostridia|Clostridiales|Ruminococcaceae|Faecalibacterium	0	0	0	0	0	0	0	0.000773395	0.000773395	0	0.00154679	0	0	0	0	0	0	0	0	0	0	0	0	0.0340294	0	0	0	0.00232019	0	0	0	0	0	0	0	0	0	0	0	0	0	0	0	0.000773395	0	0	0	0	0
Bacteria|Firmicutes|Clostridia|Clostridiales|Ruminococcaceae|Oscillibacter	0.0239753	0.00386698	0.0100541	0.00232019	0.00464037	0.00154679	0.00232019	0.00541377	0.00309358	0	0.0363496	0	0	0.00154679	0	0.00386698	0	0.0348028	0.00464037	0.000773395	0	0	0	0.0301624	0.029389	0	0.0556845	0.000773395	0.111369	0.00154679	0.00618716	0	0.00773395	0	0.0603248	0	0.0100541	0	0	0.00154679	0	0.00541377	0	0.000773395	0.00618716	0.00928074	0	0.000773395	0
Bacteria|Firmicutes|Clostridia|Clostridiales|Ruminococcaceae|Ruminiclostridium	0.00541377	0.00541377	0	0	0	0.00309358	0	0.000773395	0.00386698	0	0.00154679	0	0	0	0	0	0	0.00386698	0.00464037	0.000773395	0.00386698	0.00232019	0	0	0.00154679	0	0.00773395	0	0.0116009	0	0.00309358	0	0.00154679	0	0.0131477	0	0.00232019	0.00154679	0	0	0	0	0	0.00232019	0.000773395	0.00309358	0	0	0.00541377
Bacteria|Firmicutes|Clostridia|Clostridiales|Ruminococcaceae|Ruminococcaceae	0.0402166	0.285383	0.0386698	0.235112	0.0201083	0.326373	0.0146945	0.242846	0.0162413	0.20263	0.0510441	0.12993	0.117556	0.0139211	0.124517	0.0549111	0.0154679	0.0232019	0.134571	0.0177881	0.348801	0.103635	0	0.0100541	0.0409899	0.058778	0.0440835	0.146945	0.029389	0.121423	0.025522	0.0510441	0.0224285	0	0.0108275	0.0154679	0.0139211	0.0301624	0.0409899	0.275329	0.0116009	0.0270688	0.0556845	0.249033	0.00464037	0.151585	0.00154679	0.171694	0.111369
Bacteria|Firmicutes|Clostridia|Clostridiales|Ruminococcaceae|Subdoligranulum	0	0.000773395	0.00386698	0	0	0	0.000773395	0	0.00154679	0	0.000773395	0	0.00232019	0	0	0	0	0	0	0	0	0	0	0	0	0.000773395	0	0	0	0	0	0	0	0	0	0	0	0.00696056	0.000773395	0	0	0	0	0.00232019	0	0	0	0.00541377	0
Bacteria|Firmicutes|Clostridia|Thermoanaerobacterales|Thermoanaerobacterales|Thermoanaerobacterium	0	0	0	0	0	0	0	0	0	0	0	0	0	0	0	0	0	0	0	0	0.000773395	0	0	0	0	0	0	0	0	0	0	0	0	0	0	0	0	0	0	0	0	0	0	0	0	0	0	0	0
Bacteria|Firmicutes|Erysipelotrichia|Erysipelotrichales|Erysipelotrichaceae|Allobaculum	0	0	0	0	0	0	0	0.0185615	0	0	0	0	0.000773395	0	0.000773395	0	0	0	0	0	0	0	0	0	0	0	0	0.000773395	0	0.00232019	0	0	0	0	0	0	0	0	0	0	0	0	0	0	0	0	0	0	0
Bacteria|Firmicutes|Erysipelotrichia|Erysipelotrichales|Erysipelotrichaceae|Candidatus_Stoquefichus	0	0	0	0	0	0	0	0	0	0	0	0	0	0	0	0	0	0	0	0	0.00154679	0	0	0	0	0	0	0	0	0	0	0	0	0	0	0	0	0	0	0	0	0	0	0	0	0	0	0	0
Bacteria|Firmicutes|Erysipelotrichia|Erysipelotrichales|Erysipelotrichaceae|Erysipelotrichaceae	0	0.00850735	0	0.00464037	0	0.00618716	0.00309358	0.00464037	0.000773395	0	0	0	0	0	0.00232019	0.00232019	0	0	0	0	0.00386698	0	0	0	0	0	0	0.000773395	0	0.00618716	0	0	0.00154679	0.000773395	0	0	0	0	0	0.0108275	0	0.00232019	0	0.00541377	0	0.00386698	0.000773395	0.000773395	0
Bacteria|Firmicutes|Erysipelotrichia|Erysipelotrichales|Erysipelotrichaceae|Faecalibaculum	0	0.000773395	0	0	0	0	0	0.00386698	0	0	0	0	0	0	0	0	0	0	0	0	0	0	0	0	0	0	0	0	0	0	0	0	0	0	0	0	0	0	0	0	0	0	0	0	0	0	0	0	0
Bacteria|Firmicutes|Erysipelotrichia|Erysipelotrichales|Erysipelotrichaceae|Holdemanella	0	0	0	0	0	0	0.000773395	0	0	0	0	0	0	0	0	0	0	0	0	0	0	0	0	0	0	0	0	0	0	0	0	0	0	0	0	0	0	0	0	0	0	0	0	0	0	0	0	0	0
Bacteria|Firmicutes|Erysipelotrichia|Erysipelotrichales|Erysipelotrichaceae|Turicibacter	0.0116009	0.00464037	0.0123743	0.0239753	0.0139211	0.0139211	0.0177881	0.0433101	0.00309358	0.00309358	0.0139211	0.0100541	0	0	0.00154679	0	0	0.00154679	0.0139211	0.000773395	0	0.00154679	0	0	0.00773395	0.00696056	0	0.0216551	0.0116009	0.00154679	0.00618716	0.0247486	0.00618716	0.00696056	0.00464037	0	0.0116009	0.0402166	0.00618716	0.0146945	0.00696056	0.0123743	0.0425367	0.0154679	0	0.0247486	0.00154679	0.0201083	0.058778
Bacteria|Firmicutes|Negativicutes|Selenomonadales|Acidaminococcaceae|Phascolarctobacterium	0	0	0	0	0	0	0	0	0	0	0	0	0	0	0	0	0	0	0	0	0	0	0	0	0	0	0	0	0	0	0	0	0	0	0	0	0	0	0	0	0	0	0	0	0	0	0	0	0
Bacteria|Firmicutes|Negativicutes|Selenomonadales|Veillonellaceae|Dialister	0	0	0	0	0	0	0	0	0	0	0	0	0	0	0	0	0	0	0	0	0	0	0	0	0	0	0	0	0	0	0	0	0	0	0	0	0	0	0	0	0	0	0	0	0	0	0	0.00232019	0
Bacteria|Firmicutes|Negativicutes|Selenomonadales|Veillonellaceae|Megasphaera	0	0	0	0	0	0	0	0	0	0	0	0	0	0	0	0	0	0	0	0	0	0	0	0	0	0	0	0	0	0	0	0	0	0	0	0	0	0	0	0	0	0	0	0	0	0	0	0	0
Bacteria|Firmicutes|Negativicutes|Selenomonadales|Veillonellaceae|Veillonella	0	0	0	0	0	0	0	0	0	0	0	0	0	0	0	0	0	0	0	0	0	0	0	0	0	0	0	0	0	0	0	0	0	0	0	0	0	0	0	0	0	0	0	0	0	0	0	0	0.000773395
Bacteria|Fusobacteria|Fusobacteriia|Fusobacteriales|Fusobacteriaceae|Fusobacterium	0	0	0	0	0	0	0	0	0	0	0	0	0	0	0	0	0	0	0	0	0	0	0	0	0	0	0	0	0	0	0	0	0	0	0	0.00154679	0	0	0	0	0	0	0	0	0	0	0	0	0.00154679
Bacteria|Gemmatimonadetes|Gemmatimonadetes|Gemmatimonadales|Gemmatimonadaceae|Gemmatimonadaceae	0	0	0	0	0	0	0	0	0	0	0	0	0	0	0	0	0	0	0	0	0	0	0.000773395	0	0	0	0	0	0	0	0	0	0	0	0	0	0	0	0.00154679	0	0	0	0	0	0	0	0	0	0
Bacteria|Gemmatimonadetes|Gemmatimonadetes|Gemmatimonadales|Gemmatimonadaceae|Gemmatimonas	0	0	0	0	0	0	0	0	0	0	0	0	0	0	0	0	0	0	0	0	0	0	0	0	0	0	0	0	0	0	0	0	0	0	0	0	0	0	0	0	0	0	0	0	0	0	0	0	0
Bacteria|Planctomycetes|Phycisphaerae|Tepidisphaerales|Tepidisphaeraceae|Tepidisphaeraceae	0	0	0	0	0	0	0	0	0	0	0	0	0	0	0	0	0	0	0	0	0	0	0.00232019	0	0	0	0	0	0	0	0	0	0	0	0	0	0	0	0	0	0	0	0	0	0	0	0	0	0
Bacteria|Planctomycetes|Planctomycetacia|Planctomycetales|Planctomycetaceae|Gemmata	0	0	0	0	0	0	0	0	0	0	0	0	0	0	0	0	0	0	0	0	0	0	0.00154679	0	0	0	0	0	0	0	0	0	0	0	0	0	0	0	0	0.00232019	0	0	0	0	0	0	0	0	0
Bacteria|Proteobacteria|Alphaproteobacteria|Alphaproteobacteria|Alphaproteobacteria|Alphaproteobacteria	0	0	0	0.00309358	0	0	0	0	0	0	0	0	0	0	0	0	0	0	0	0	0	0	0	0	0	0	0	0	0	0	0	0	0	0	0	0	0	0	0	0	0	0	0	0	0	0	0	0	0
Bacteria|Proteobacteria|Alphaproteobacteria|Caulobacterales|Caulobacteraceae|Asticcacaulis	0	0	0	0	0	0	0	0	0	0	0	0	0.00309358	0	0	0	0	0	0	0	0	0	0	0	0	0	0	0	0	0	0	0	0	0	0	0	0	0	0	0	0	0	0	0	0	0	0	0	0
Bacteria|Proteobacteria|Alphaproteobacteria|Caulobacterales|Caulobacteraceae|Brevundimonas	0	0	0	0	0	0	0	0	0	0	0	0	0	0	0	0	0	0	0	0	0	0	0	0	0	0	0	0	0	0	0	0	0	0	0	0	0	0	0	0	0	0	0	0	0	0	0	0	0
Bacteria|Proteobacteria|Alphaproteobacteria|Caulobacterales|Caulobacteraceae|Caulobacter	0	0	0	0.000773395	0	0	0	0	0	0	0	0	0	0	0	0	0	0	0	0	0	0	0	0	0	0	0	0	0	0	0	0	0	0	0	0	0	0	0	0	0	0	0	0	0	0	0	0	0
Bacteria|Proteobacteria|Alphaproteobacteria|Caulobacterales|Caulobacteraceae|Phenylobacterium	0	0	0	0	0	0	0	0	0	0	0	0	0	0	0	0	0	0	0	0	0	0	0.00386698	0	0	0	0	0	0	0	0	0	0	0	0	0	0	0	0	0	0	0	0	0	0	0	0	0	0
Bacteria|Proteobacteria|Alphaproteobacteria|Rhizobiales|Aurantimonadaceae|Aureimonas	0.000773395	0	0.00232019	0	0.00232019	0	0	0	0	0	0	0	0	0	0	0	0	0	0	0	0	0	0	0	0	0.00232019	0	0	0	0	0	0	0	0	0	0	0	0	0	0	0	0	0.00464037	0	0	0	0	0.00773395	0
Bacteria|Proteobacteria|Alphaproteobacteria|Rhizobiales|Bradyrhizobiaceae|Bradyrhizobiaceae	0	0	0	0	0	0	0	0	0	0	0	0	0	0	0	0	0	0	0	0	0	0	0.000773395	0	0	0	0	0	0	0	0	0	0	0	0	0	0	0	0	0	0	0	0	0	0	0	0	0	0
Bacteria|Proteobacteria|Alphaproteobacteria|Rhizobiales|Bradyrhizobiaceae|Bradyrhizobium	0	0	0	0	0	0	0	0	0	0	0	0	0	0	0	0	0	0	0	0	0	0	0	0	0	0	0	0	0	0	0	0	0	0.00618716	0	0	0	0	0	0	0	0.00232019	0	0	0	0	0	0	0
Bacteria|Proteobacteria|Alphaproteobacteria|Rhizobiales|Bradyrhizobiaceae|Rhodopseudomonas	0	0	0	0	0	0	0	0	0	0	0	0	0	0	0	0	0	0	0	0	0	0	0	0	0	0	0	0	0	0	0	0	0	0	0	0	0	0	0	0	0	0	0	0	0	0	0	0	0
Bacteria|Proteobacteria|Alphaproteobacteria|Rhizobiales|Brucellaceae|Ochrobactrum	0	0	0	0	0	0	0.000773395	0	0.00386698	0	0	0	0	0	0	0	0	0	0	0	0	0	0	0	0	0	0	0	0	0	0	0	0	0	0	0	0	0	0	0.00309358	0	0	0	0	0	0	0	0	0
Bacteria|Proteobacteria|Alphaproteobacteria|Rhizobiales|Hyphomicrobiaceae|Devosia	0.00154679	0	0.000773395	0	0	0	0.000773395	0	0.000773395	0	0.00154679	0	0	0	0	0	0	0	0	0	0	0	0.0170147	0	0	0	0	0	0	0	0	0	0	0	0	0	0	0	0	0	0	0	0	0	0	0	0	0	0
Bacteria|Proteobacteria|Alphaproteobacteria|Rhizobiales|Methylobacteriaceae|Methylobacterium	0	0	0	0.00464037	0	0	0	0	0	0	0	0	0	0	0	0	0	0	0	0	0	0.000773395	0.00541377	0	0	0	0	0	0	0	0	0	0	0	0	0	0	0	0.00232019	0	0	0	0	0	0	0	0	0	0
Bacteria|Proteobacteria|Alphaproteobacteria|Rhizobiales|Methylobacteriaceae|Microvirga	0	0	0	0	0	0	0	0	0	0	0	0	0	0	0	0	0	0	0	0	0.000773395	0	0.0201083	0	0	0	0	0	0	0	0	0	0	0	0	0	0	0	0	0	0	0	0	0	0	0	0	0	0
Bacteria|Proteobacteria|Alphaproteobacteria|Rhizobiales|Phyllobacteriaceae|Mesorhizobium	0	0	0	0	0	0	0	0	0	0	0	0	0	0	0	0	0	0	0	0	0	0	0	0	0	0	0	0	0	0	0	0	0	0	0	0.0123743	0	0	0	0	0	0	0	0	0	0	0	0	0
Bacteria|Proteobacteria|Alphaproteobacteria|Rhizobiales|Rhizobiaceae|Kaistia	0	0	0	0	0	0	0	0	0.00232019	0	0	0	0	0	0	0	0	0	0	0	0	0	0	0	0	0	0	0	0	0	0	0	0	0	0	0	0	0	0	0	0	0	0	0	0	0	0	0	0
Bacteria|Proteobacteria|Alphaproteobacteria|Rhizobiales|Rhizobiaceae|Rhizobium	0.00618716	0	0	0.0278422	0.00309358	0	0	0	0.00309358	0	0.00618716	0.000773395	0	0	0	0	0	0	0	0	0	0	0	0	0	0	0	0	0	0	0	0	0	0	0	0	0	0	0	0	0	0	0.00386698	0	0.000773395	0	0	0	0
Bacteria|Proteobacteria|Alphaproteobacteria|Rhizobiales|Rhizobiales|Rhizobiales	0	0	0	0	0	0	0	0	0	0	0	0	0	0	0	0	0	0	0	0	0	0	0.0100541	0	0	0	0	0	0	0	0	0	0	0	0	0	0	0	0	0	0	0	0	0	0	0	0	0	0
Bacteria|Proteobacteria|Alphaproteobacteria|Rhodobacterales|Rhodobacteraceae|Falsirhodobacter	0	0	0.00154679	0	0.000773395	0	0	0	0	0	0	0	0	0	0	0	0	0	0	0	0	0	0	0	0	0	0	0	0	0	0	0	0	0	0	0	0	0	0	0	0	0	0	0	0	0	0	0	0
Bacteria|Proteobacteria|Alphaproteobacteria|Rhodobacterales|Rhodobacteraceae|Paracoccus	0	0	0	0	0	0	0	0	0	0	0	0	0	0	0	0	0	0	0	0	0	0	0	0	0	0	0	0.00154679	0	0	0	0	0	0	0	0	0	0	0	0	0	0	0	0	0	0	0	0	0
Bacteria|Proteobacteria|Alphaproteobacteria|Rhodobacterales|Rhodobacteraceae|Rubellimicrobium	0	0	0	0	0	0	0	0	0	0	0	0	0	0	0	0	0	0	0	0	0	0	0.0301624	0	0	0	0	0	0	0	0	0	0	0	0	0	0	0	0	0	0	0	0	0	0	0	0	0	0
Bacteria|Proteobacteria|Alphaproteobacteria|Rhodospirillales|Acetobacteraceae|Roseomonas	0	0	0	0	0	0	0	0	0	0	0	0	0	0	0	0	0	0	0	0	0	0	0.000773395	0	0	0	0	0	0	0	0	0	0	0	0	0	0	0	0	0	0	0	0	0	0	0	0	0	0
Bacteria|Proteobacteria|Alphaproteobacteria|Rhodospirillales|Rhodospirillaceae|Rhodospirillaceae	0	0.00232019	0	0	0	0	0	0	0	0	0	0	0.00386698	0	0.00696056	0	0.0278422	0	0	0	0.00618716	0.00386698	0	0	0	0.00850735	0	0.00154679	0	0.00541377	0	0	0	0	0	0	0	0	0	0.000773395	0	0	0	0	0	0	0	0	0
Bacteria|Proteobacteria|Alphaproteobacteria|Rhodospirillales|Rhodospirillaceae|Skermanella	0	0	0	0	0	0	0.00464037	0	0	0	0	0	0	0	0	0	0	0	0	0	0	0	0	0	0	0	0	0	0	0	0	0	0	0	0	0	0	0	0	0	0	0	0	0	0	0	0	0	0
Bacteria|Proteobacteria|Alphaproteobacteria|Rickettsiales|Mitochondria|Mitochondria	0.000773395	0	0.00618716	0	0.00464037	0.000773395	0.0154679	0	0.00850735	0.00232019	0.0108275	0.0100541	0.000773395	0	0	0	0	0	0.00541377	0.00309358	0.00309358	0	0.00618716	0.00232019	0	0.00618716	0	0	0	0	0	0.000773395	0	0.00154679	0	0.00386698	0	0.00154679	0.00618716	0	0	0.00232019	0.00386698	0.000773395	0.0317092	0.00464037	0.0185615	0.00386698	0
Bacteria|Proteobacteria|Alphaproteobacteria|Sphingomonadales|Erythrobacteraceae|Altererythrobacter	0	0	0	0	0	0	0	0	0	0	0	0	0	0	0	0	0	0	0	0	0	0	0.00154679	0	0	0	0	0	0	0	0	0	0	0	0	0	0	0	0	0	0	0	0	0	0	0	0	0	0
Bacteria|Proteobacteria|Alphaproteobacteria|Sphingomonadales|Erythrobacteraceae|Erythrobacter	0	0	0	0	0	0	0	0	0	0	0.00232019	0	0	0	0	0	0	0	0	0	0	0	0.0201083	0	0	0	0	0	0	0	0	0	0	0	0	0	0	0	0	0	0	0	0	0.00618716	0	0	0	0	0
Bacteria|Proteobacteria|Alphaproteobacteria|Sphingomonadales|Erythrobacteraceae|Porphyrobacter	0	0	0	0	0	0	0	0	0	0	0	0.00309358	0	0	0	0	0	0	0	0	0	0	0	0	0	0	0	0	0	0	0	0	0	0	0	0	0	0	0	0	0	0	0	0	0	0.00309358	0	0	0
Bacteria|Proteobacteria|Alphaproteobacteria|Sphingomonadales|Sphingomonadaceae|Novosphingobium	0	0	0	0.00696056	0	0	0	0	0	0	0	0	0	0	0	0	0	0	0	0	0	0	0.0193349	0	0	0	0	0	0	0	0	0	0	0	0	0	0	0	0	0	0	0	0	0	0	0	0	0	0
Bacteria|Proteobacteria|Alphaproteobacteria|Sphingomonadales|Sphingomonadaceae|Sandarakinorhabdus	0	0	0	0	0	0	0	0	0	0	0	0	0	0	0	0	0	0	0	0	0	0	0	0	0	0	0	0	0	0	0	0	0	0	0	0	0	0	0	0.000773395	0	0	0	0	0	0	0	0	0
Bacteria|Proteobacteria|Alphaproteobacteria|Sphingomonadales|Sphingomonadaceae|Sphingobium	0	0	0	0	0	0	0	0	0	0	0	0	0	0	0	0	0	0	0	0	0	0	0	0	0	0	0	0	0	0	0	0	0	0	0	0	0	0	0	0	0	0	0	0	0	0	0	0	0
Bacteria|Proteobacteria|Alphaproteobacteria|Sphingomonadales|Sphingomonadaceae|Sphingomonas	0	0	0	0.00541377	0	0	0	0	0	0	0	0	0.00232019	0	0	0	0	0	0.00386698	0	0	0	0.0773395	0	0	0.00928074	0	0	0	0	0	0	0	0	0	0	0	0	0.000773395	0	0	0	0	0	0	0	0.00154679	0	0
Bacteria|Proteobacteria|Betaproteobacteria|Burkholderiales|Alcaligenaceae|Bordetella	0	0	0	0.00154679	0	0	0	0	0	0	0.00232019	0	0	0	0	0	0	0	0	0	0	0	0	0	0	0	0	0	0	0	0	0	0	0	0	0	0	0	0	0	0	0	0	0	0	0	0	0	0
Bacteria|Proteobacteria|Betaproteobacteria|Burkholderiales|Alcaligenaceae|Parasutterella	0.0224285	0.0108275	0.00309358	0.0131477	0	0.0146945	0	0.00386698	0	0	0.00696056	0	0	0.0170147	0.0193349	0.0378964	0.0185615	0.0340294	0.00154679	0.00850735	0.00773395	0.00154679	0	0	0.0185615	0.00928074	0	0.0100541	0.00464037	0.0185615	0.0100541	0	0.025522	0	0.00618716	0	0.0162413	0	0	0.00773395	0.0224285	0	0	0.00618716	0.00154679	0.00464037	0	0.00850735	0
Bacteria|Proteobacteria|Betaproteobacteria|Burkholderiales|Alcaligenaceae|Sutterella	0	0.000773395	0	0	0	0.00309358	0	0	0	0	0	0	0	0	0	0	0	0	0	0	0	0	0	0	0	0	0	0.00154679	0	0.000773395	0	0	0	0	0	0	0	0	0	0	0	0	0	0	0	0.00309358	0	0	0
Bacteria|Proteobacteria|Betaproteobacteria|Burkholderiales|Burkholderiaceae|Burkholderia_Paraburkholderia	0	0	0	0	0	0	0	0	0	0	0	0	0	0	0	0	0	0	0	0	0.000773395	0	0	0	0	0	0	0	0	0	0	0	0	0	0	0	0	0	0	0	0	0	0	0	0	0	0	0	0
Bacteria|Proteobacteria|Betaproteobacteria|Burkholderiales|Burkholderiaceae|Cupriavidus	0.000773395	0	0	0.00386698	0	0	0	0	0	0	0	0	0.000773395	0	0	0	0	0	0.000773395	0	0	0	0	0	0	0	0	0	0	0	0	0	0	0	0	0	0	0	0	0	0	0	0.00386698	0	0	0	0	0	0
Bacteria|Proteobacteria|Betaproteobacteria|Burkholderiales|Burkholderiaceae|Ralstonia	0.000773395	0.00154679	0.00232019	0.000773395	0	0.00154679	0.00773395	0	0.00928074	0.00464037	0.00232019	0.0108275	0.00386698	0	0	0	0	0	0.00773395	0.000773395	0.00309358	0	0.00464037	0.0479505	0	0.00232019	0	0	0	0	0	0.00850735	0	0.0146945	0	0.0518175	0	0	0.00464037	0.000773395	0	0.00232019	0.00386698	0.00696056	0.00232019	0.00154679	0.00773395	0.00154679	0.00464037
Bacteria|Proteobacteria|Betaproteobacteria|Burkholderiales|Comamonadaceae|Acidovorax	0	0	0	0.000773395	0	0	0	0	0	0	0	0	0	0	0	0	0	0	0.00232019	0.00386698	0	0.000773395	0.167053	0	0	0	0	0	0	0	0	0.00773395	0	0.0108275	0	0	0	0	0	0	0	0	0	0	0	0	0	0	0
Bacteria|Proteobacteria|Betaproteobacteria|Burkholderiales|Comamonadaceae|Aquabacterium	0	0	0	0	0	0	0	0	0	0	0.000773395	0	0	0	0	0	0	0	0	0	0	0	0.0247486	0	0	0	0	0	0	0	0	0	0	0	0	0	0	0	0	0	0	0	0	0	0	0	0	0	0
Bacteria|Proteobacteria|Betaproteobacteria|Burkholderiales|Comamonadaceae|Tepidimonas	0	0	0	0	0	0	0	0	0	0	0	0	0	0	0	0	0	0	0	0	0.00386698	0	0	0	0	0	0	0	0	0	0	0	0	0	0	0	0	0	0	0	0	0	0	0	0	0	0	0	0
Bacteria|Proteobacteria|Betaproteobacteria|Burkholderiales|Oxalobacteraceae|Massilia	0	0	0	0.00154679	0	0	0	0	0.000773395	0.00154679	0	0	0	0	0	0	0	0	0	0	0	0	0.0286156	0.00850735	0	0	0	0	0	0	0	0.00154679	0	0	0	0	0	0	0	0	0	0	0	0	0	0	0	0	0
Bacteria|Proteobacteria|Deltaproteobacteria|Bdellovibrionales|Bdellovibrionaceae|Bdellovibrio	0	0	0	0	0	0	0	0	0	0	0	0	0	0	0	0	0	0	0	0	0	0	0.00154679	0	0	0	0	0	0	0	0	0	0	0	0	0	0	0	0	0	0	0	0	0	0	0	0	0	0
Bacteria|Proteobacteria|Deltaproteobacteria|Desulfovibrionales|Desulfovibrionaceae|Bilophila	0	0.00386698	0	0	0	0	0	0	0	0	0	0	0	0	0.00232019	0	0	0	0	0	0.00309358	0	0	0	0	0	0	0	0	0.000773395	0	0	0	0	0	0	0	0	0	0	0	0	0	0	0	0	0	0	0
Bacteria|Proteobacteria|Deltaproteobacteria|Desulfovibrionales|Desulfovibrionaceae|Desulfovibrio	0	0.00154679	0	0	0	0	0	0	0	0.000773395	0	0	0	0	0.000773395	0	0	0	0	0	0	0	0	0	0	0	0	0	0	0.000773395	0	0	0	0	0	0	0	0	0	0.00309358	0	0	0	0.000773395	0	0.00154679	0	0	0
Bacteria|Proteobacteria|Deltaproteobacteria|Myxococcales|Archangiaceae|Cystobacter	0	0	0	0.00309358	0	0	0	0	0	0	0	0	0	0	0	0	0	0	0	0	0.00386698	0	0	0	0	0	0	0	0	0	0	0	0	0	0	0	0	0	0	0	0	0	0	0	0	0	0	0	0
Bacteria|Proteobacteria|Deltaproteobacteria|Myxococcales|Phaselicystidaceae|Phaselicystis	0	0	0	0	0	0	0	0	0	0	0	0	0	0	0	0	0	0	0	0	0	0	0.00618716	0	0	0	0	0	0	0	0	0	0	0	0	0	0	0	0	0	0	0	0	0	0	0	0	0	0
Bacteria|Proteobacteria|Deltaproteobacteria|Myxococcales|Polyangiaceae|Sorangium	0	0	0	0	0	0	0	0	0	0	0	0	0	0	0	0	0	0	0	0	0	0	0	0	0	0	0	0	0	0	0	0	0	0	0	0	0	0	0	0	0	0	0	0	0	0	0	0	0
Bacteria|Proteobacteria|Deltaproteobacteria|Oligoflexales|Oligoflexaceae|Oligoflexaceae	0	0	0	0	0	0	0	0	0	0	0	0	0	0	0	0	0	0	0	0	0	0	0	0	0	0	0	0	0	0	0	0	0	0	0	0	0	0	0.00154679	0	0	0	0	0	0	0	0	0	0
Bacteria|Proteobacteria|Gammaproteobacteria|Aeromonadales|Aeromonadaceae|Aeromonas	0	0	0	0.000773395	0	0	0	0	0	0	0	0	0	0	0	0	0	0	0	0	0	0	0	0	0	0	0	0	0	0	0	0	0	0	0	0	0	0	0	0	0	0	0	0	0	0	0	0	0
Bacteria|Proteobacteria|Gammaproteobacteria|Alteromonadales|Shewanellaceae|Shewanella	0	0	0	0	0	0	0	0	0	0	0	0	0	0	0	0	0	0	0	0.000773395	0	0	0	0	0	0	0	0	0	0	0	0	0	0	0	0	0	0	0	0	0	0	0	0	0	0	0	0	0
Bacteria|Proteobacteria|Gammaproteobacteria|Cellvibrionales|Cellvibrionaceae|Cellvibrio	0	0	0	0	0.00232019	0	0	0	0	0	0	0	0	0	0	0	0	0	0	0	0	0	0	0	0	0	0	0	0	0	0	0	0	0	0	0	0	0	0	0	0	0	0	0	0	0	0	0	0
Bacteria|Proteobacteria|Gammaproteobacteria|Chromatiales|Chromatiaceae|Rheinheimera	0	0	0	0.00464037	0	0	0	0	0	0	0	0	0	0	0	0	0	0	0	0	0	0	0	0	0	0	0	0	0	0	0	0	0	0	0	0	0	0	0	0	0	0	0	0	0	0	0	0	0
Bacteria|Proteobacteria|Gammaproteobacteria|Enterobacteriales|Enterobacteriaceae|Enterobacter	0	0.000773395	0	0.000773395	0	0	0	0	0	0	0	0	0	0	0	0	0	0	0.000773395	0	0.00232019	0	0	0	0	0	0	0	0	0.000773395	0	0.00309358	0	0	0	0	0	0.00232019	0	0	0	0.000773395	0.000773395	0	0.000773395	0	0	0.000773395	0.00309358
Bacteria|Proteobacteria|Gammaproteobacteria|Enterobacteriales|Enterobacteriaceae|Escherichia/Shigella	0.00386698	0	0	0	0.00154679	0.00386698	0.00154679	0.00154679	0.000773395	0.00309358	0.00309358	0.00773395	0.00154679	0	0.0123743	0	0.000773395	0	0.00309358	0.000773395	0	0	0	0.0487239	0	0.00386698	0	0.00541377	0	0.0131477	0	0.0123743	0	0.00541377	0	0	0	0	0.00464037	0.00696056	0	0.0116009	0.000773395	0.000773395	0	0.00386698	0.000773395	0.00154679	0.0193349
Bacteria|Proteobacteria|Gammaproteobacteria|Enterobacteriales|Enterobacteriaceae|Morganella	0	0	0	0	0	0	0	0	0	0	0	0	0	0	0.00232019	0	0	0	0	0	0	0	0	0	0	0	0	0	0	0.00154679	0	0	0	0	0	0	0	0	0	0	0	0	0	0	0	0	0	0	0
Bacteria|Proteobacteria|Gammaproteobacteria|Legionellales|Coxiellaceae|Aquicella	0	0	0	0	0	0	0	0	0	0	0	0	0	0	0	0	0	0	0	0	0	0	0.00309358	0	0	0	0	0	0	0	0	0	0	0	0	0	0	0	0	0	0	0	0	0	0	0	0	0	0
Bacteria|Proteobacteria|Gammaproteobacteria|Pasteurellales|Pasteurellaceae|Haemophilus	0	0	0	0	0	0	0	0	0	0	0.00232019	0	0	0	0	0	0	0	0	0	0	0	0	0	0	0	0	0	0	0	0	0	0	0	0	0	0	0	0	0	0	0	0	0	0	0	0	0	0
Bacteria|Proteobacteria|Gammaproteobacteria|Pseudomonadales|Moraxellaceae|Acinetobacter	0	0.00386698	0	0.0394432	0	0.0108275	0	0.00541377	0.00154679	0.0162413	0	0.0139211	0.00386698	0	0	0	0	0	0.00541377	0.000773395	0.00850735	0	0	0.0170147	0	0.00541377	0	0.000773395	0	0	0	0.0108275	0	0.0309358	0	0.029389	0	0.0131477	0	0.00618716	0	0.0309358	0.00309358	0.0154679	0	0.00232019	0	0.00541377	0.0239753
Bacteria|Proteobacteria|Gammaproteobacteria|Pseudomonadales|Moraxellaceae|Enhydrobacter	0	0	0	0	0	0	0	0	0	0	0	0	0	0	0	0	0	0	0	0	0	0	0	0	0	0	0	0	0	0	0	0	0	0	0	0.00618716	0	0	0	0	0	0	0	0	0	0	0	0	0
Bacteria|Proteobacteria|Gammaproteobacteria|Pseudomonadales|Moraxellaceae|Moraxella	0	0	0	0	0	0	0	0	0	0.00464037	0.00154679	0	0	0	0.00154679	0	0	0	0	0	0	0	0	0	0	0	0	0	0	0	0	0	0	0	0	0	0	0	0	0	0	0	0	0	0	0	0	0	0
Bacteria|Proteobacteria|Gammaproteobacteria|Pseudomonadales|Pseudomonadaceae|Pseudomonas	0	0.000773395	0	0.0116009	0.00154679	0.000773395	0	0.00386698	0	0.00154679	0.000773395	0.00309358	0	0	0	0	0	0	0.00154679	0	0.00154679	0	0	0.0232019	0	0.00232019	0	0	0	0	0	0.00154679	0	0	0	0	0	0	0.00386698	0	0	0.00232019	0.000773395	0	0	0.00618716	0.00154679	0.00541377	0
Bacteria|Proteobacteria|Gammaproteobacteria|Xanthomonadales|Xanthomonadaceae|Lysobacter	0	0	0	0.000773395	0	0	0	0	0	0	0	0	0	0	0	0	0	0	0	0	0	0	0	0	0	0	0	0	0	0	0	0	0	0	0	0	0	0	0	0	0	0	0	0.00154679	0	0	0	0	0
Bacteria|Proteobacteria|Gammaproteobacteria|Xanthomonadales|Xanthomonadaceae|Panacagrimonas	0	0	0	0	0	0	0	0	0	0	0	0	0	0	0	0	0	0	0	0	0	0	0	0	0	0	0	0	0	0	0	0	0	0	0	0	0	0	0	0	0	0	0	0.00154679	0	0	0	0	0
Bacteria|Proteobacteria|Gammaproteobacteria|Xanthomonadales|Xanthomonadaceae|Stenotrophomonas	0.000773395	0	0	0.00232019	0.00154679	0	0	0	0.00232019	0	0.00154679	0	0	0	0	0	0	0	0.00618716	0.00154679	0	0	0	0.033256	0	0	0	0	0	0	0	0	0	0	0	0	0	0	0	0	0	0	0	0	0	0	0	0	0
Bacteria|Proteobacteria|Gammaproteobacteria|Xanthomonadales|Xanthomonadaceae|Xanthomonas	0.00309358	0	0	0	0	0	0.00386698	0	0	0	0	0	0	0	0	0	0	0	0.00154679	0	0	0	0	0	0	0	0	0	0	0	0	0	0	0	0	0	0	0	0	0	0	0	0	0	0	0	0	0	0
Bacteria|Proteobacteria|Gammaproteobacteria|Xanthomonadales|Xanthomonadales|Acidibacter	0	0	0	0	0	0	0	0	0	0	0	0	0	0	0	0	0	0	0	0	0	0	0	0	0	0	0	0	0	0	0	0	0	0	0	0	0	0	0	0	0	0	0	0	0	0	0	0	0.00541377
Bacteria|Synergistetes|Synergistia|Synergistales|Synergistaceae|Cloacibacillus	0	0	0	0	0	0	0	0	0	0	0	0	0	0	0	0	0	0	0.000773395	0	0	0	0	0	0	0	0	0	0	0	0	0	0	0	0	0	0	0	0	0	0	0	0	0	0	0.000773395	0	0	0
Bacteria|Tenericutes|Mollicutes|Anaeroplasmatales|Anaeroplasmataceae|Anaeroplasma	0.00618716	0	0	0	0	0	0.000773395	0	0	0	0.000773395	0	0	0.00154679	0	0.00541377	0	0.00541377	0.000773395	0	0	0	0	0	0.0123743	0	0.00773395	0	0.0177881	0	0.00232019	0	0.000773395	0	0	0	0.000773395	0.00309358	0	0	0.000773395	0	0	0	0	0	0	0	0
Bacteria|Tenericutes|Mollicutes|Mollicutes|Mollicutes|Mollicutes	0.00386698	0.0162413	0.00541377	0.00928074	0.000773395	0.0116009	0	0.00154679	0.00232019	0.0108275	0.00309358	0.00386698	0	0.00154679	0.00386698	0.00232019	0	0	0.0201083	0	0.0232019	0	0	0	0.0108275	0	0.00232019	0.00154679	0	0.000773395	0.00541377	0	0.00541377	0	0.00154679	0	0.00232019	0	0	0.00696056	0.000773395	0	0	0.00618716	0	0.0108275	0	0.0131477	0
Bacteria|Verrucomicrobia|Verrucomicrobia|Verrucomicrobia|Verrucomicrobia|Verrucomicrobia	0	0	0	0	0	0	0	0	0	0	0	0	0	0	0	0	0	0	0	0	0	0	0	0	0	0	0	0	0	0	0	0	0	0	0	0	0	0	0	0	0	0	0	0.00541377	0	0	0	0	0
Bacteria|Verrucomicrobia|Verrucomicrobiae|Verrucomicrobiales|Verrucomicrobiaceae|Akkermansia	0.0355762	0.000773395	0.0100541	0.00232019	0.00154679	0.00154679	0.0100541	0.000773395	0.00232019	0.00464037	0.0301624	0	0.0193349	0.2529	0.0378964	0.273009	0.0116009	0.104408	0.0100541	0.0409899	0.00309358	0.150812	0	0.00850735	0.0788863	0	0.0541377	0.00696056	0.0433101	0.0433101	0.165507	0.00154679	0.0866203	0.0208817	0.0402166	0.0108275	0.122196	0.00618716	0.00850735	0	0.142305	0.00232019	0.000773395	0.0116009	0.00154679	0	0.00464037	0.00232019	0.00154679
[truncated: 6 more columns]
