# Supplementary material for: Effect of Antibiotics on Gut and Vaginal Microbiomes Associated with Cervical Cancer Development in Mice
Source: Oxford University Press journal article supplement (doi:10.1158/1940-6207.capr-20-0103), 2020-09-11
Supplement: 19406207capr200103-sup-238593_2_supp_6478137_q4lylh.xlsx [file 19406207capr200103-sup-238593_2_supp_6478137_q4lylh.xlsx]

## Sheet: Sheet1
Table S3. Metadata of mice in the study
Mouse ID	Cohort (Discovery/1, Validation/2)	AB treatment	Paired samples (Yes/1, No/0)	Vagina	Gut	Tumor growth (Yes/1, No/0)
M1	1	N	1			0
M10	1	N	1			1
M11	1	N	1			0
M12	1	N	1			0
M13	1	N	1			0
M14	1	N	1			0
M15	1	N	1			0
M16	1	N	0		NA	0
M17	1	N	1			1
M18	1	N	1			0
M19	1	N	0	NA		1
M2	1	N	1			0
M20	1	N	1			0
M20B	1	N	0		NA	0
M21	1	A	1			1
M22	1	A	1			1
M23	1	A	1			0
M24	1	A	1			1
M25	1	A	1			1
M26	1	A	1			0
M27	1	A	1			0
M28	1	A	1			0
M29	1	A	1			1
M3	1	N	1			0
M30	1	A	1			1
M31	1	A	1			1
M32	1	A	1			1
M33	1	A	1			1
M34	1	A	1			0
M35	1	A	0	NA		0
M36	1	A	1			1
M37	1	A	1			0
M38	1	A	1			0
M39	1	A	1			0
M4	1	N	1			0
M40	1	A	1			1
M41	1	N	1			1
M42	1	N	1			1
M43	1	N	1			1
M44	1	N	1			0
M45	1	N	1			0
M46	1	N	1			0
M47	1	N	0		NA	0
M48	1	N	1			0
M49	1	N	1			0
M5	1	N	1			0
M50	1	N	0		NA	1
M51	1	N	1			0
M6	1	N	1			1
M7	1	N	1			0
M8	1	N	1			1
M9	1	N	1			0
M1	2	A	1			1
M10	2	A	1			1
M11	2	A	1			1
M12	2	A	1			1
M13	2	A	1			1
M14	2	A	1			1
M15	2	A	1			1
M16	2	N	0		NA	1
M17	2	N	1			1
M18	2	N	1			1
M19	2	N	1			1
M2	2	A	1			1
M20	2	N	0		NA	1
M21	2	N	0		NA	1
M22	2	N	0		NA	1
M23	2	N	1			1
M24	2	N	1			0
M25	2	N	1			1
M26	2	N	1			1
M27	2	N	1			1
M28	2	N	1			1
M29	2	N	1			1
M3	2	A	1			1
M30	2	N	1			1
M4	2	A	1			0
M5	2	A	1			0
M6	2	A	0		NA	1
M7	2	A	1			0
M8	2	A	1			1
M9	2	A	1			1
