# Supplementary material for: Effect of Antibiotics on Gut and Vaginal Microbiomes Associated with Cervical Cancer Development in Mice
Source: Oxford University Press journal article supplement (doi:10.1158/1940-6207.capr-20-0103), 2020-09-11
Supplement: 19406207capr200103-sup-238593_2_supp_6505406_qf87c5.docx [file 19406207capr200103-sup-238593_2_supp_6505406_qf87c5.docx]

**Supplementary tables**

Table S1. OTUs and their normalized abundances in the discovery cohort

Table S2. OTUs and their normalized abundances in the validation cohort

Table S3. Metadata of mice in the study

Table S4. Known and novel effects of the AB exposure and their association with cervical cancer development
